# Supplementary material
Source: PubMed Central journal article supplement (PMC6595478)
Supplement: NIHMS1030605-supplement-Supporting_Information.pdf [file NIHMS1030605-supplement-Supporting_Information.pdf]

# Enantioselective Conia-Ene-Type Cyclizations of Alkynyl Ketones through Cooperative Action of $B(C_6F_5)_3$ , *N*-Alkylamine and a Zn-Based Catalyst

*Min Cao, Ahmet Yesilcimen, and Masayuki Wasa\**

*Department of Chemistry, Merkert Chemistry Center, Boston College, Chestnut Hill,  
Massachusetts 02467, United States*

|                                                                         |       |
|-------------------------------------------------------------------------|-------|
| 1. Procedures, Materials and Instrumentation                            | S-2   |
| 2. Experimental Section                                                 | S-4   |
| 2.1 Substrate Preparation                                               | S-4   |
| 2.2 Preparation of Chiral $ZnI_2$ /BOX Complexes                        | S-17  |
| 2.3 Optimizations Studies                                               | S-18  |
| 2.4 General Procedures for the Enantioselective Conia-Ene-Type Reaction | S-23  |
| 2.5 Procedure for Large Scale Reaction                                  | S-24  |
| 3. Analytical Data                                                      | S-25  |
| 4. Determination of Absolute Configuration                              | S-85  |
| 5. References                                                           | S-89  |
| 6. NMR Spectra for New Compounds                                        | S-91  |
| 7. X-Ray Crystallography Data                                           | S-131 |

## 1. Procedures, Materials and Instrumentation

### 1.1 General Experimental Procedures

All reactions were performed in standard, oven-dried glassware fitted with rubber septa under an inert atmosphere of nitrogen unless otherwise described. Stainless steel syringes or cannulas were used to transfer air- and moisture-sensitive liquids. Reported concentrations refer to solution volumes at room temperature. Evaporation and concentration *in vacuo* were performed using house vacuum (ca. 40 mm Hg). Column chromatography was performed with SiliaFlash® 60 (40–63 micron) silica gel from Silicycle. Thin layer chromatography (TLC) was used for reaction monitoring and product detection using pre-coated glass plates covered with 0.25 mm silica gel with fluorescent indicator; visualization by UV light ( $\lambda_{\text{ex}} = 254 \text{ nm}$ ) or  $\text{KMnO}_4$  stain.

### 1.2 Materials

Reagents were purchased in reagent grade from commercial suppliers and used without further purification, unless otherwise described.  $\text{H}_2\text{O}$ , in synthetic procedures, refers to distilled water. Chiral ligands **L1-L12** were prepared according to the procedures previously reported in the literature.<sup>1-4</sup> Substrates **1a-1s** and **3a** were also synthesized according to the literature procedures.<sup>5-14</sup>

### 1.3 Instrumentation

Proton nuclear magnetic resonance ( $^1\text{H}$  NMR) spectra and proton-decoupled carbon nuclear magnetic resonance ( $^{13}\text{C}$  { $^1\text{H}}$ } NMR) spectra were recorded at 25°C (unless stated otherwise) on Inova 600 (600 MHz) or Varian Unity/Inova 500 (500 MHz) or Oxford AS400 (400 MHz) spectrometers at the Boston College nuclear magnetic resonance facility. Chemical shifts for protons are reported in parts per million downfield from tetramethylsilane and are referenced to residual protium in the NMR solvent. Chemical shifts for carbon are reported in parts per million downfield from tetramethylsilane and are referenced to the carbon resonances of the solvent. The solvent peak was referenced to 0 ppm for  $^1\text{H}$  for tetramethylsilane and 77.0 ppm for  $^{13}\text{C}$  for  $\text{CDCl}_3$ . Data are represented as follows: chemical

shift, integration, multiplicity (br = broad, s = singlet, d = doublet, t = triplet, q = quartet, qn = quintet, sp = septet, m = multiplet), coupling constants in Hertz (Hz).

Optical rotations were measured using a 1 mL cell with a 5 cm path length on a Rudolph Research Analytical Autopol IV Polarimeter. Infrared spectra were recorded on a Bruker FT-IR Alpha (ATR mode) spectrophotometer. Data are represented as follows: frequency of absorption ( $\text{cm}^{-1}$ ). High-resolution mass spectrometry was performed on a JEOL AccuTOF-DART (positive mode) or Agilent 6220 TOF-ESI (positive mode) at the Mass Spectrometry Facility, Boston College. Chiral HPLC analyses were carried using Agilent 1200 series instruments with Daicel CHIRALPAK® columns or Daicel CHIRALCEL® columns (internal diameter 4.6 mm, column length 250 mm, particle size 5  $\mu\text{m}$ ).

#### **1.4 Abbreviations Used**

Bn = benzyl, DART = direct analysis in real time, DCE = 1,2-dichloroethane, DCM = dichloromethane, er = enantiomeric ratio,  $\text{Et}_2\text{O}$  = diethyl ether, EtOAc = ethyl acetate,  $\text{H}_2\text{O}$  = water, HPLC = high pressure liquid chromatography, HR = high-resolution, LC = liquid chromatography, MS = mass spectrometry, NA = not applicable, PMP = 1,2,2,6,6-pentamethylpiperidine, PTFE = Polytetrafluoroethylene, PTLC = preparative thin layer chromatography, Tf = trifluoromethanesulfonate, THF = tetrahydrofuran, TOF = time-of-flight, Ts = 4-toluenesulfonyl.

## 2. Experimental Section

### 2.1 Substrate Preparation

#### General Procedure A:

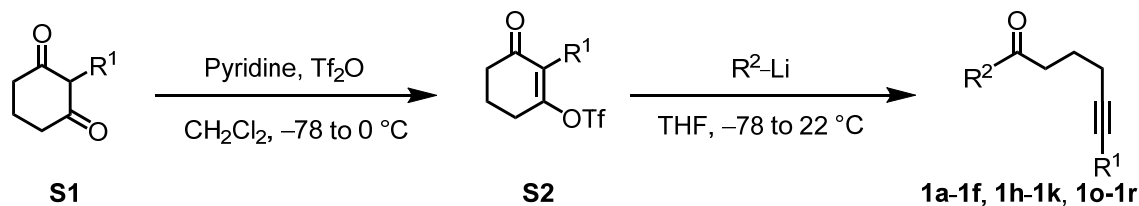

#### Preparation of S2:

To a solution of cyclohexanedione **S1** (1.0 equiv.) in dichloromethane (0.2 M), pyridine (2.0 equiv.) was added. The mixture was then cooled to  $-78 \text{ }^\circ\text{C}$  and trifluoromethane sulfonic anhydride ( $\text{Tf}_2\text{O}$ , 1.2 equiv.) was added slowly at  $-78 \text{ }^\circ\text{C}$ . The reaction mixture was allowed to stir for 10 min at  $-78 \text{ }^\circ\text{C}$  and warmed to  $0 \text{ }^\circ\text{C}$ . After the starting material (**S1**) was consumed (as determined by TLC), the mixture was acidified with 1N HCl (aq.) and extracted with dichloromethane (3 x 50 mL). The combined organic layers were dried over  $\text{Na}_2\text{SO}_4$ , and concentrated *in vacuo*. The resulting residue was purified by silica gel column chromatography (pentane:ether = 5:1) to yield **S2**.<sup>5</sup>

#### Preparation of 1a-1f, 1h-1k, 1o-1r:

To a solution of **S2** (1.0 equiv.) in THF (0.25 M) at  $-78 \text{ }^\circ\text{C}$  under  $\text{N}_2$  atmosphere was added  $\text{R}^2\text{-Li}$  (0.9 equiv.),<sup>6-7</sup> dropwise. The reaction mixture was allowed to stir at  $-78 \text{ }^\circ\text{C}$  for 10 minutes, then for 10 minutes at  $0 \text{ }^\circ\text{C}$ , followed by 30 minutes at room temperature. Upon completion of the reaction, saturated  $\text{NH}_4\text{Cl}$  (aq.) was added to quench the reaction and the mixture was extracted with  $\text{Et}_2\text{O}$  (3 x 50 mL). The combined organic layers were washed with brine, dried over  $\text{MgSO}_4$ , filtered, and concentrated *in vacuo*. The resulting mixture was purified by silica gel column chromatography using (hexanes:ethyl acetate = 100:1) to afford **1**.<sup>5</sup>

### General Procedure B:

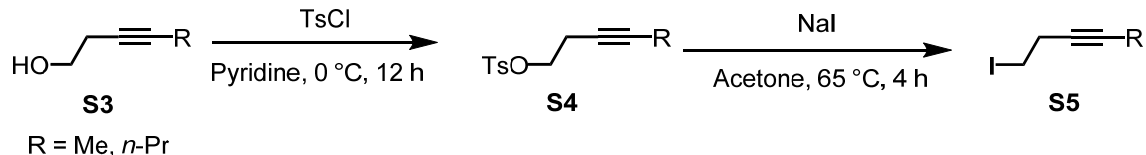

### Synthesis of **S5**:

**S5** was prepared from **S3** according to the known procedures.<sup>12</sup> To a solution of the alkynol **S3** (1.0 equiv.) in dry pyridine (1.25 M) was added *p*-toluene sulfonyl chloride (1.1 equiv.) and the reaction mixture was allowed to stir at 0 °C for 12 h. Upon completion, the reaction mixture was poured into water and was subsequently extracted with Et<sub>2</sub>O (3 x 50 mL). The combined ether layers were washed with saturated CuSO<sub>4</sub> (aq.) and brine, and then dried over anhydrous MgSO<sub>4</sub>. The solvent was removed *in vacuo*, and the crude product **S4** was used without further purification. To a solution of **S4** (1.0 equiv.) in acetone (0.4 M) was added sodium iodide (3.0 equiv.). The reaction mixture was allowed to heat at reflux for 4 h. Subsequently, the reaction mixture was concentrated *in vacuo*, and the resulting mixture was poured into water and extracted with pentane (3 x 50 mL). The combined organic layers were washed with water then brine, and dried over anhydrous Na<sub>2</sub>SO<sub>4</sub>. The solvent was evaporated under reduced pressure and the resulting mixture was purified by silica gel column chromatography (hexanes:ethyl acetate = 50:1) to afford **S5** as a colorless liquid.

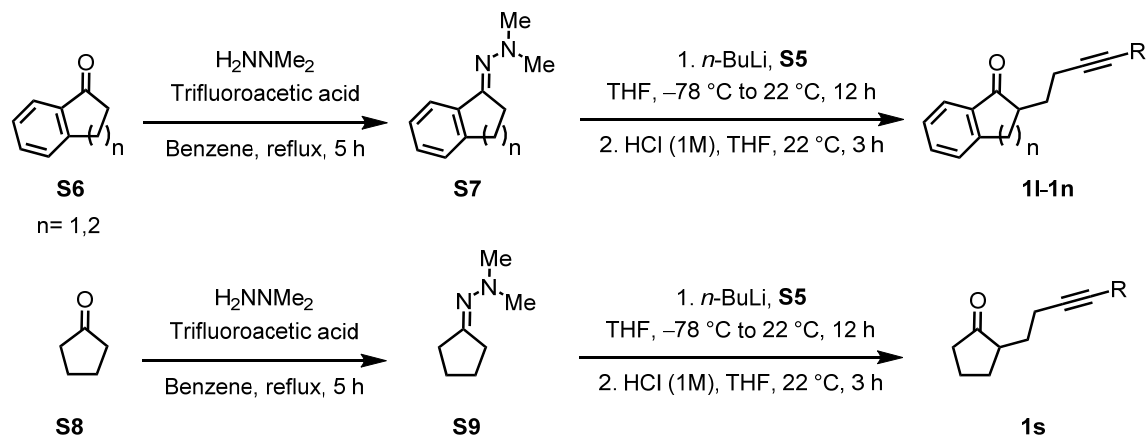

**Synthesis of S7 and S9:**

To a stirred solution of cycloketone **S6** or **S8** (1.0 equiv.) in benzene (0.6 M) was added *N,N*-dimethylhydrazine (1.2 equiv.) and trifluoroacetic acid (10 drops). The mixture was allowed to stir at reflux for 15 h with a Dean-Stark apparatus. Benzene was removed by distillation at atmospheric pressure. The residue was dissolved in Et<sub>2</sub>O (30 mL), and ice water (25 mL) was added. After extraction with Et<sub>2</sub>O (3 x 20 mL), the combined organic layers was washed with brine and dried over Na<sub>2</sub>SO<sub>4</sub>. After filtration and removal of the solvent, the residue was purified by distillation to give the desired compound **S7** or **S9**.<sup>13</sup>

**Synthesis of 1l-1n, 1s:**

To a solution of *N,N*-dimethylhydrazone **S7** or **S9** (1.0 equiv.) in THF (0.25 M) was added *n*-BuLi (1.2 equiv.), dropwise at -5 °C. The reaction mixture was allowed to stir for 1 h at -5 °C, whereupon a solution of **S5** (1.1 equiv.) in THF (1 M) was added dropwise. The reaction mixture was allowed to stir at room temperature for 12 h, then 2N HCl (aq., 20 mL) was added to the solution. The reaction mixture was allowed to stir at room temperature for 3 h and extracted with ethyl acetate (5 x 10 mL). The combined organic layers was successively washed with aqueous Na<sub>2</sub>S<sub>2</sub>O<sub>4</sub> solution (2 x 50 mL), brine (2 x 50 mL) and dried over Na<sub>2</sub>SO<sub>4</sub>. After filtration and removal of the solvent, the residue was purified by silica gel column chromatography to give compound **1**.<sup>13</sup>

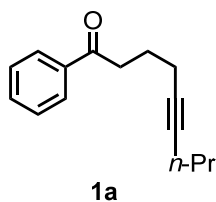

### 1-Phenylnon-5-yn-1-one (1a)

1-Phenylnon-5-yn-1-one was prepared following the **General Procedure A** starting with 30 mmol of 2-propylcyclohexane-1,3-dione.<sup>8</sup> The product was obtained as a pale-yellow oil (5.9 g, 92% yield). **<sup>1</sup>H NMR** (500 MHz, CDCl<sub>3</sub>) δ 7.99 (d, *J* = 9.5 Hz, 2H), 7.56 (t, *J* = 7.4 Hz, 1H), 7.46 (t, *J* = 7.6 Hz, 2H), 3.11 (t, *J* = 7.3 Hz, 2H), 2.33 – 2.26 (m, 2H), 2.17 – 2.09 (m, 2H), 1.93 (p, *J* = 7.0 Hz, 2H), 1.50 (h, *J* = 7.3 Hz, 2H), 0.97 (t, *J* = 7.4 Hz, 3H); **<sup>13</sup>C NMR** (151 MHz, CDCl<sub>3</sub>) δ 202.55, 139.68, 135.59, 131.19, 130.69, 83.78, 81.99, 39.97, 26.20, 25.12, 23.40, 20.97, 16.13; **IR** (neat) 2958, 2930, 2869, 1682, 1596, 1579, 1447, 1366, 1228, 1000, 745, 689 cm<sup>-1</sup>; **HRMS** (DART) *m/z* Calcd for C<sub>15</sub>H<sub>19</sub>O (MH<sup>+</sup>): 215.1430; found: 215.14261.

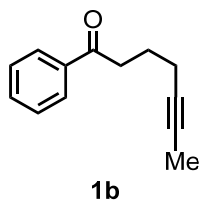

### 1-Phenylhept-5-yn-1-one (1b)

1-Phenylhept-5-yn-1-one was prepared following the **General Procedure A** starting with 10 mmol of 2-methylcyclohexane-1,3-dione. The product was obtained as a colorless oil (1.7 g, 90% yield). **<sup>1</sup>H NMR** (500 MHz, CDCl<sub>3</sub>) δ 7.99 (d, *J* = 9.7 Hz, 2H), 7.56 (t, *J* = 8.0 Hz, 1H), 7.49 – 7.44 (m, 2H), 3.10 (t, *J* = 7.3 Hz, 2H), 2.31 – 2.23 (m, 2H), 1.92 (p, *J* = 7.0 Hz, 2H), 1.78 (t, *J* = 2.6 Hz, 3H); **<sup>13</sup>C NMR** (151 MHz, CDCl<sub>3</sub>) δ 202.50, 139.67, 135.59, 131.19, 130.68, 81.04, 79.06, 39.98, 26.06, 20.93, 6.11; **IR** (neat) 2934, 2915, 1681, 1595, 1579, 1446, 1365, 1319, 1228, 1198, 1000, 745, 689 cm<sup>-1</sup>; **HRMS** (DART) *m/z* Calcd for C<sub>13</sub>H<sub>15</sub>O (MH<sup>+</sup>): 187.11174; found: 187.11099.

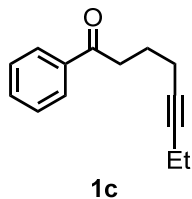

### 1-Phenyloct-5-yn-1-one (1c)

1-Phenyloct-5-yn-1-one was prepared following the **General Procedure A** starting with 10 mmol of 2-ethylcyclohexane-1,3-dione.<sup>8</sup> The product was obtained as a yellow oil (1.7 g, 88% yield). **<sup>1</sup>H NMR** (500 MHz, CDCl<sub>3</sub>) δ 7.99 (d, *J* = 8.1 Hz, 2H), 7.56 (t, *J* = 7.3 Hz, 1H), 7.47 (t, *J* = 7.6 Hz, 2H), 3.11 (t, *J* = 7.3 Hz, 2H), 2.29 (t, *J* = 6.7 Hz, 2H), 2.16 (q, *J* = 7.1 Hz, 2H), 1.93 (p, *J* = 7.1 Hz, 2H), 1.11 (t, *J* = 7.9 Hz, 3H); **<sup>13</sup>C NMR** (151 MHz, CDCl<sub>3</sub>) δ 202.54, 139.68, 135.59, 131.19, 130.69, 85.31, 81.20, 39.95, 26.16, 20.94, 16.96, 15.05; **IR** (neat) 2970, 2934, 1681, 1596, 1579, 1447, 1366, 1318, 1228, 1000, 745, 689 cm<sup>-1</sup>; **HRMS** (DART) *m/z* Calcd for C<sub>14</sub>H<sub>17</sub>O (MH<sup>+</sup>): 201.12739; found: 201.12675.

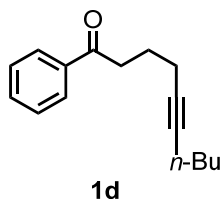

### 1-Phenyldec-5-yn-1-one (1d)

1-Phenyldec-5-yn-1-one was prepared following the **General Procedure A** starting with 10 mmol of 2-butylcyclohexane-1,3-dione.<sup>8</sup> The product was obtained as a colorless oil (1.9 g, 85% yield). **<sup>1</sup>H NMR** (500 MHz, CDCl<sub>3</sub>) δ 7.99 (d, *J* = 7.1 Hz, 2H), 7.56 (t, 1H), 7.47 (t, *J* = 7.9 Hz, 2H), 3.11 (t, *J* = 7.3 Hz, 2H), 2.33 – 2.26 (m, 2H), 2.19 – 2.11 (m, 2H), 1.97 – 1.87 (m, 2H), 1.50 – 1.33 (m, 4H), 0.90 (t, *J* = 7.2 Hz, 3H); **<sup>13</sup>C NMR** (151 MHz, CDCl<sub>3</sub>) δ 202.55, 139.68, 135.58, 131.19, 130.69, 83.92, 81.81, 39.96, 33.82, 26.18, 24.59, 21.07, 20.97, 16.26; **IR** (neat) 2953, 2929, 1683, 1596, 1447, 1366, 1228, 1000, 743, 689 cm<sup>-1</sup>; **HRMS** (DART) *m/z* Calcd for C<sub>16</sub>H<sub>21</sub>O (MH<sup>+</sup>): 229.15869; found: 229.15855.



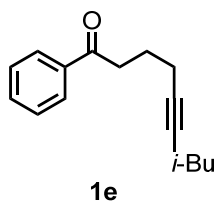

### 8-Methyl-1-phenylnon-5-yn-1-one (1e)

8-Methyl-1-phenylnon-5-yn-1-one was prepared following the **General Procedure A** starting with 10 mmol of 2-isobutylcyclohexane-1,3-dione.<sup>9</sup> The product was obtained as a colorless oil (1.8 g, 78% yield). **<sup>1</sup>H NMR** (500 MHz, CDCl<sub>3</sub>) δ 7.98 (d, *J* = 8.5 Hz, 2H), 7.56 (t, *J* = 7.4 Hz, 1H), 7.46 (t, *J* = 7.7 Hz, 2H), 3.12 (t, *J* = 7.3 Hz, 2H), 2.33 – 2.28 (m, 2H), 2.07 – 2.02 (m, 2H), 1.94 (p, *J* = 7.0 Hz, 2H), 1.81 – 1.71 (m, 1H), 0.96 (d, *J* = 6.6 Hz, 6H); **<sup>13</sup>C NMR** (151 MHz, CDCl<sub>3</sub>) δ 202.54, 139.67, 135.59, 131.19, 130.68, 82.79, 82.71, 39.99, 30.87, 30.63, 26.24, 24.60, 20.99; **IR** (neat) 2953, 2903, 1683, 1595, 1579, 1447, 1366, 1228, 1000, 748, 689 cm<sup>-1</sup>; **HRMS** (DART) *m/z* Calcd for C<sub>16</sub>H<sub>21</sub>O (MH<sup>+</sup>): 229.15869; found: 229.15854.

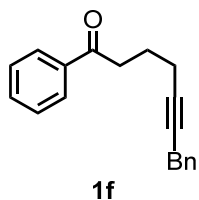

### 1,7-Diphenylhept-5-yn-1-one (1f)

1,7-Diphenylhept-5-yn-1-one was prepared following the **General Procedure A** starting with 10 mmol of 2-benzylcyclohexane-1,3-dione.<sup>8</sup> The product was obtained as a yellow oil (2.4 g, 90% yield). **<sup>1</sup>H NMR** (500 MHz, CDCl<sub>3</sub>) δ 7.96 (d, *J* = 9.6 Hz, 2H), 7.56 (t, *J* = 7.4 Hz, 1H), 7.45 (t, *J* = 7.7 Hz, 2H), 7.36 – 7.27 (m, 4H), 7.22 (t, *J* = 7.2 Hz, 1H), 3.58 (s, 2H), 3.13 (t, *J* = 7.3 Hz, 2H), 2.40 – 2.33 (m, 2H), 1.98 (p, *J* = 7.0 Hz, 2H); **<sup>13</sup>C NMR** (151 MHz, CDCl<sub>3</sub>) δ 202.45, 140.14, 139.68, 135.65, 131.25, 131.14, 130.73, 130.53, 129.14, 84.38, 81.43, 39.96, 27.85, 26.07, 21.08; **IR** (neat) 3057, 3019, 1679, 1595, 1156, 1000, 728, 688 cm<sup>-1</sup>; **HRMS** (DART) *m/z* Calcd for C<sub>19</sub>H<sub>19</sub>O (MH<sup>+</sup>): 263.14304; found: 263.14192.

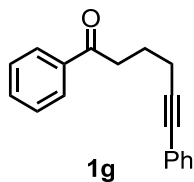

### 1,6-Diphenylhex-5-yn-1-one (1g)

1,6-Diphenylhex-5-yn-1-one was prepared based on a known procedure with the following modifications.<sup>14</sup> To a solution of iodobenzene (4.3 g, 21 mmol, 2.1 equiv.), 1-phenylhex-5-yn-1-one<sup>5</sup> (1.7 g, 10 mmol, 1.0 equiv.), triethylamine (20.2 g, 200 mmol, 20 equiv.) in THF (2 M) under N<sub>2</sub> was added Pd(PPh<sub>3</sub>)<sub>4</sub> (115 mg, 0.1 mmol, 1 mol%) and CuI (38 mg, 0.2 mmol, 2 mol%). The reaction mixture was allowed to stir at 22 °C for 12 h. The mixture was filtered through a plug of Celite and the filtrate was washed with Et<sub>2</sub>O, then concentrated under reduced pressure. The product was purified by column chromatography (hexanes:ethyl acetate = 20:1) to give the desired product as pale-yellow oil (2.4 g, 95% yield). **<sup>1</sup>H NMR** (500 MHz, CDCl<sub>3</sub>) δ 8.00 (d, *J* = 7.1 Hz, 2H), 7.56 (t, *J* = 7.4 Hz, 1H), 7.46 (t, *J* = 7.7 Hz, 2H), 7.38 (dd, *J* = 6.5, 3.2 Hz, 2H), 7.31 – 7.26 (m, 3H), 3.19 (t, *J* = 7.2 Hz, 2H), 2.56 (t, *J* = 6.8 Hz, 2H), 2.06 (p, *J* = 7.0 Hz, 2H); **<sup>13</sup>C NMR** (151 MHz, CDCl<sub>3</sub>) δ 202.37, 139.63, 135.68, 134.21, 131.25, 130.87, 130.71, 130.31, 126.43, 91.96, 84.13, 39.92, 25.81, 21.61; **IR** (neat) 3055, 2934, 1681, 1595, 1488, 1446, 1228, 755, 689 cm<sup>-1</sup>; **HRMS** (DART) *m/z* Calcd for C<sub>18</sub>H<sub>17</sub>O (MH<sup>+</sup>): 249.12739; found: 249.12754.

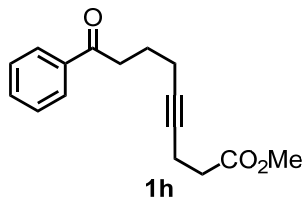

**Methyl 9-oxo-9-phenylnon-4-ynoate (1h)**

Methyl 9-oxo-9-phenylnon-4-ynoate was prepared following the **General Procedure A** starting with 10 mmol of methyl 3-(2,6-dioxocyclohexyl) propanoate.<sup>10</sup> The product was obtained as a colorless oil (1.7 g, 65% yield). **<sup>1</sup>H NMR** (500 MHz, CDCl<sub>3</sub>) δ 7.98 (d, *J* = 9.6 Hz, 2H), 7.56 (t, *J* = 7.4 Hz, 1H), 7.47 (t, *J* = 7.6 Hz, 2H), 3.66 (s, 3H), 3.09 (t, *J* = 7.3 Hz, 2H), 2.52 – 2.44 (m, 4H), 2.30 – 2.25 (m, 2H), 1.91 (p, *J* = 7.0 Hz, 2H); **<sup>13</sup>C NMR** (126 MHz, CDCl<sub>3</sub>) δ 199.80, 172.51, 136.99, 132.96, 128.55, 128.03, 80.17, 79.09, 51.65, 37.19, 33.79, 23.27, 18.22, 14.74; **IR** (neat) 2948, 1735, 1682, 1446, 1365, 1229, 1165, 749, 650 cm<sup>-1</sup>; **HRMS** (DART) *m/z* Calcd for C<sub>16</sub>H<sub>19</sub>O<sub>3</sub> (MH<sup>+</sup>): 259.1329; found: 259.13287.

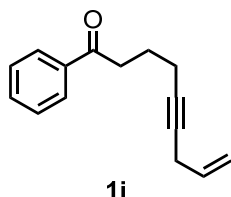

**1-Phenylnon-8-en-5-yn-1-one (1i)**

1-Phenylnon-8-en-5-yn-1-one was prepared following the **General Procedure A** starting with 10 mmol of 2-allylcyclohexane-1,3-dione.<sup>11</sup> The product was obtained as a colorless oil (1.8 g, 87% yield). **<sup>1</sup>H NMR** (500 MHz, CDCl<sub>3</sub>) δ 7.98 (d, *J* = 8.3 Hz, 2H), 7.56 (t, *J* = 7.4 Hz, 1H), 7.46 (t, *J* = 7.6 Hz, 2H), 5.87 – 5.77 (m, 1H), 5.30 (dd, *J* = 16.9, 1.8 Hz, 1H), 5.09 (dd, *J* = 9.9, 1.7 Hz, 1H), 3.12 (t, *J* = 7.3 Hz, 2H), 2.97 – 2.91 (m, 2H), 2.38 – 2.30 (m, 2H), 1.96 (p, *J* = 7.0 Hz, 2H); **<sup>13</sup>C NMR** (126 MHz, CDCl<sub>3</sub>) δ 200.12, 137.34, 133.57, 133.29, 128.89, 128.37, 116.00, 82.17, 77.94, 37.63, 23.76, 23.45, 18.68; **IR** (neat) 2935, 2896, 1682, 1596, 1447, 1367, 1199, 990, 914, 750, 689 cm<sup>-1</sup>; **HRMS** (DART) *m/z* Calcd for C<sub>15</sub>H<sub>17</sub>O (MH<sup>+</sup>): 213.12739; found: 213.12681.

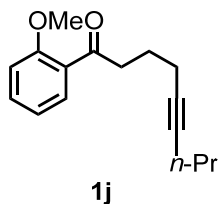

### 1-(2-Methoxyphenyl)non-5-yn-1-one (1j)

1-(2-Methoxyphenyl)non-5-yn-1-one was prepared following the **General Procedure A** starting with 10 mmol of 2-propylcyclohexane-1,3-dione.<sup>8</sup> The product was obtained as a colorless oil (1.7 g, 72% yield). **<sup>1</sup>H NMR** (500 MHz, CDCl<sub>3</sub>) δ 7.67 (dd, *J* = 7.7, 1.8 Hz, 1H), 7.48 – 7.42 (m, 1H), 7.03 – 6.94 (m, 2H), 3.90 (s, 3H), 3.09 (t, *J* = 7.3 Hz, 2H), 2.28 – 2.22 (m, 2H), 2.16 – 2.08 (m, 2H), 1.91 – 1.84 (m, 2H), 1.49 (h, *J* = 7.2 Hz, 2H), 0.96 (t, *J* = 7.4 Hz, 3H); **<sup>13</sup>C NMR** (126 MHz, CDCl<sub>3</sub>) δ 202.37, 158.44, 133.19, 130.17, 128.58, 120.59, 111.50, 80.66, 79.67, 55.44, 42.69, 23.81, 22.48, 20.76, 18.43, 13.45; **IR** (neat) 2958, 2931, 1671, 1595, 1483, 1462, 1435, 1282, 1243, 1023, 756 cm<sup>-1</sup>; **HRMS** (DART) *m/z* Calcd for C<sub>16</sub>H<sub>21</sub>O<sub>2</sub> (MH<sup>+</sup>): 245.15361; found: 245.15500.

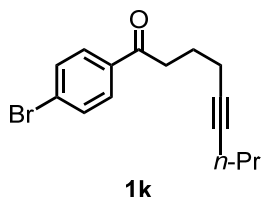

### 1-(4-Bromophenyl)non-5-yn-1-one (1k)

1-(4-Bromophenyl)non-5-yn-1-one was prepared following the **General Procedure A** starting with 10 mmol of 2-propylcyclohexane-1,3-dione.<sup>8</sup> The product was obtained as a colorless oil (2.2 g, 76% yield). **<sup>1</sup>H NMR** (500 MHz, CDCl<sub>3</sub>) δ 7.85 (d, *J* = 8.5 Hz, 2H), 7.61 (d, *J* = 8.5 Hz, 2H), 3.07 (t, *J* = 7.3 Hz, 2H), 2.32 – 2.26 (m, 2H), 2.15 – 2.09 (m, 2H), 1.92 (p, *J* = 7.0 Hz, 2H), 1.50 (q, *J* = 7.2 Hz, 2H), 0.96 (t, *J* = 7.3 Hz, 3H); **<sup>13</sup>C NMR** (126 MHz, CDCl<sub>3</sub>) δ 198.80, 135.72, 131.84, 129.57, 128.07, 81.25, 79.18, 37.23, 23.41, 22.46, 20.73, 18.25, 13.48; **IR** (neat) 2957, 2930, 1683, 1583, 1394, 1227, 1068, 1009, 991, 809 cm<sup>-1</sup>; **HRMS** (DART) *m/z* Calcd for C<sub>15</sub>H<sub>18</sub>OBr (MH<sup>+</sup>): 293.05355; found: 293.05285.

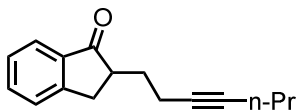

1l

**2-(Hept-3-yn-1-yl)-2,3-dihydro-1H-inden-1-one (1l)**

2-(Hept-3-yn-1-yl)-2,3-dihydro-1H-inden-1-one was prepared following the **General Procedure B** starting with 20 mmol of 2,3-dihydro-1H-inden-1-one. The product was obtained as a dark brown oil (2.2 g, 50% yield). <sup>1</sup>H NMR (500 MHz, CDCl<sub>3</sub>) δ 7.76 (d, *J* = 7.6 Hz, 1H), 7.59 (t, *J* = 7.4 Hz, 1H), 7.46 (d, *J* = 7.6 Hz, 1H), 7.37 (t, *J* = 7.4 Hz, 1H), 3.43 – 3.33 (m, 1H), 2.91 – 2.81 (m, 2H), 2.48 – 2.31 (m, 2H), 2.25 – 2.14 (m, 1H), 2.14 – 2.06 (m, 2H), 1.69 – 1.60 (m, 1H), 1.49 (dt, *J* = 14.5, 7.2 Hz, 2H), 0.95 (t, *J* = 7.4 Hz, 3H); <sup>13</sup>C NMR (151 MHz, CDCl<sub>3</sub>) δ 211.14, 156.17, 139.42, 137.31, 130.01, 129.16, 126.52, 83.94, 81.71, 49.24, 35.35, 33.36, 25.06, 23.39, 19.79, 16.14; IR (neat) 2957, 2927, 1708, 1607, 1462, 1275, 747 cm<sup>-1</sup>; HRMS (DART) *m/z* Calcd for C<sub>16</sub>H<sub>19</sub>O (MH<sup>+</sup>): 227.14304; found: 227.14176.

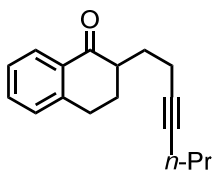

1m

**2-(Hept-3-yn-1-yl)-3,4-dihydronaphthalen-1(2H)-one (1m)**

2-(Hept-3-yn-1-yl)-3,4-dihydronaphthalen-1(2H)-one was prepared following the **General Procedure B** starting with 20 mmol of 3,4-dihydronaphthalen-1(2H)-one. The product was obtained as a brown oil (3.0 g, 62% yield). <sup>1</sup>H NMR (500 MHz, CDCl<sub>3</sub>) δ 8.03 (d, *J* = 8.9 Hz, 1H), 7.50 – 7.42 (m, 1H), 7.30 (t, *J* = 7.8 Hz, 1H), 7.24 (d, *J* = 7.7 Hz, 1H), 3.07 – 2.99 (m, 2H), 2.73 – 2.63 (m, 1H), 2.44 – 2.36 (m, 1H), 2.36 – 2.20 (m, 3H), 2.15 – 2.08 (m, 2H), 1.93 – 1.83 (m, 1H), 1.68 – 1.57 (m, 1H), 1.49 (h, *J* = 7.3 Hz, 2H), 0.95 (t, *J* = 7.4 Hz, 3H); <sup>13</sup>C NMR (151 MHz, CDCl<sub>3</sub>) δ 202.65, 146.53, 135.76, 135.21, 131.30, 130.05, 129.20, 83.54, 82.07, 49.05, 31.64, 31.30, 30.90, 25.12, 23.41, 19.20, 16.13; IR (neat) 2956, 2927, 2863, 2837, 1679, 1598, 1453, 1432, 1226, 909, 773 cm<sup>-1</sup>; HRMS (DART) *m/z* Calcd for C<sub>17</sub>H<sub>21</sub>O (MH<sup>+</sup>): 241.15869; found: 241.15897.

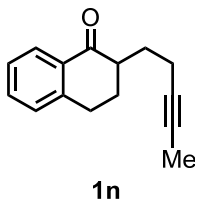

### 2-(Pent-3-yn-1-yl)-3,4-dihydronaphthalen-1(2H)-one (1n)

2-(Pent-3-yn-1-yl)-3,4-dihydronaphthalen-1(2H)-one was prepared following the **General Procedure B** starting with 20 mmol of 3,4-dihydronaphthalen-1(2H)-one. The product was obtained as a brown oil (2.8 g, 67% yield). **<sup>1</sup>H NMR** (500 MHz, CDCl<sub>3</sub>) δ 8.02 (d, *J* = 8.0 Hz, 1H), 7.45 (t, *J* = 7.7 Hz, 1H), 7.30 (t, *J* = 7.5 Hz, 1H), 7.23 (d, *J* = 7.6 Hz, 1H), 3.10 – 2.96 (m, 2H), 2.70 – 2.62 (m, 1H), 2.44 – 2.32 (m, 1H), 2.32 – 2.16 (m, 3H), 1.93 – 1.82 (m, 1H), 1.76 (s, 3H), 1.67 – 1.54 (m, 1H); **<sup>13</sup>C NMR** (151 MHz, CDCl<sub>3</sub>) δ 202.65, 146.51, 135.77, 135.21, 131.30, 130.04, 129.19, 81.13, 78.85, 48.97, 31.61, 31.26, 30.93, 19.15, 6.13; **IR** (neat) 2915, 2856, 1678, 1598, 1452, 1226, 891, 739 cm<sup>-1</sup>; **HRMS** (DART) Calcd for C<sub>15</sub>H<sub>15</sub>O (MH<sup>+</sup>): 213.12739; found: 213.12708.

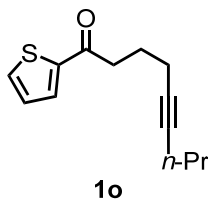

### 1-(Thiophen-2-yl)non-5-yn-1-one (1o)

1-(Thiophen-2-yl)non-5-yn-1-one was prepared following the **General Procedure A** starting with 10 mmol of 2-propylcyclohexane-1,3-dione.<sup>8</sup> The product was obtained as a pale-yellow oil (1.8 g, 82% yield). **<sup>1</sup>H NMR** (500 MHz, CDCl<sub>3</sub>) δ 7.75 (d, *J* = 4.8 Hz, 1H), 7.63 (d, *J* = 6.0 Hz, 1H), 7.15 – 7.12 (m, 1H), 3.04 (t, *J* = 7.3 Hz, 2H), 2.29 (tt, *J* = 6.8, 2.4 Hz, 2H), 2.13 (tt, *J* = 7.1, 2.4 Hz, 2H), 1.93 (p, *J* = 7.0 Hz, 2H), 1.50 (h, *J* = 7.3 Hz, 2H), 0.97 (t, *J* = 7.4 Hz, 3H); **<sup>13</sup>C NMR** (151 MHz, CDCl<sub>3</sub>) δ 195.44, 147.04, 136.04, 134.41, 130.69, 83.83, 81.84, 40.63, 26.50, 25.09, 23.36, 20.93, 16.11; **IR** (neat) 2957, 2930, 1657, 1516, 1412, 1336, 1234, 1067, 718 cm<sup>-1</sup>; **HRMS** (DART) *m/z* Calcd for C<sub>13</sub>H<sub>17</sub>OS (MH<sup>+</sup>): 221.09946; found: 221.10027.

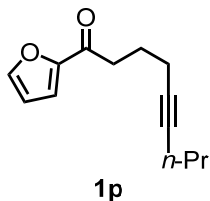

### 1-(Furan-2-yl)non-5-yn-1-one (1p)

1-(Furan-2-yl)non-5-yn-1-one was prepared following the **General Procedure A** starting with 10 mmol of 2-propylcyclohexane-1,3-dione.<sup>8</sup> The product was obtained as a pale-yellow oil (1.6 g, 79% yield). **<sup>1</sup>H NMR** (500 MHz, CDCl<sub>3</sub>) δ 7.58 (d, *J* = 0.9 Hz, 1H), 7.20 (d, *J* = 4.2 Hz, 1H), 6.53 (dd, *J* = 3.5, 1.7 Hz, 1H), 2.95 (t, *J* = 7.4 Hz, 2H), 2.30 – 2.24 (m, 2H), 2.16 – 2.08 (m, 2H), 1.95 – 1.87 (m, 2H), 1.50 (q, *J* = 7.2 Hz, 2H), 0.97 (t, *J* = 7.4 Hz, 3H); **<sup>13</sup>C NMR** (151 MHz, CDCl<sub>3</sub>) δ 191.72, 155.41, 148.87, 119.53, 114.74, 83.79, 81.82, 39.86, 26.11, 25.08, 23.36, 20.97, 16.09; **IR** (neat) 2959, 2931, 1675, 1567, 1467, 1393, 1224, 1013, 812, 761 cm<sup>-1</sup>; **HRMS** (DART) *m/z* Calcd for C<sub>13</sub>H<sub>17</sub>O<sub>2</sub> (MH<sup>+</sup>): 205.1223; found: 205.12050.

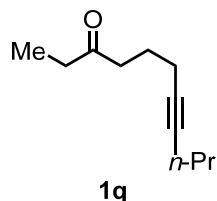

### Undec-7-yn-3-one (1q)

Undec-7-yn-3-one was prepared following the **General Procedure A** starting with 10 mmol of 2-propylcyclohexane-1,3-dione.<sup>8</sup> The product was obtained as a colorless oil (1.0 g, 60% yield). **<sup>1</sup>H NMR** (500 MHz, CDCl<sub>3</sub>) δ 2.53 (t, *J* = 6.7 Hz, 2H), 2.44 (qd, *J* = 7.3, 1.3 Hz, 2H), 2.19 (t, *J* = 6.8 Hz, 2H), 2.12 (t, *J* = 7.6 Hz, 2H), 1.76 (p, *J* = 7.1 Hz, 2H), 1.50 (h, *J* = 7.3 Hz, 2H), 1.06 (t, *J* = 7.6 Hz, 3H), 0.97 (t, *J* = 7.4 Hz, 3H); **<sup>13</sup>C NMR** (151 MHz, CDCl<sub>3</sub>) δ 214.03, 83.79, 82.07, 43.81, 38.86, 25.94, 25.33, 23.57, 21.04, 16.30, 10.66; **IR** (neat) 2958, 2932, 1711, 1456, 1373, 1112 cm<sup>-1</sup>; **HRMS** (DART) *m/z* Calcd for C<sub>11</sub>H<sub>19</sub>O (MH<sup>+</sup>): 167.14304; found: 167.14235.

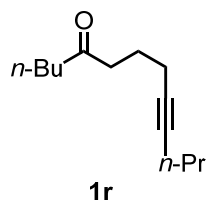

### Tridec-9-yn-5-one (1r)

Tridec-9-yn-5-one was prepared following the **General Procedure A** starting with 10 mmol of 2-propylcyclohexane-1,3-dione.<sup>8</sup> The product was obtained as a colorless oil (1.40g, 72% yield). **<sup>1</sup>H NMR** (500 MHz, CDCl<sub>3</sub>) δ 2.53 (t, *J* = 7.3 Hz, 2H), 2.41 (t, *J* = 7.5 Hz, 2H), 2.23 – 2.16 (m, 2H), 2.16 – 2.10 (m, 2H), 1.75 (p, *J* = 7.1 Hz, 2H), 1.62 – 1.45 (m, 4H), 1.36 – 1.27 (m, 2H), 0.97 (t, *J* = 7.3 Hz, 3H), 0.91 (t, *J* = 7.3 Hz, 3H); **<sup>13</sup>C NMR** (151 MHz, CDCl<sub>3</sub>) δ 213.59, 83.58, 81.87, 45.31, 43.96, 28.63, 25.65, 25.11, 24.98, 23.35, 20.80, 16.47, 16.09; **IR** (neat) 2956, 2930, 2869, 1711, 1454, 1370, 1125, 1083 cm<sup>-1</sup>; **HRMS** (DART) *m/z* Calcd for C<sub>13</sub>H<sub>23</sub>O (MH<sup>+</sup>): 195.17434; found: 195.17324.

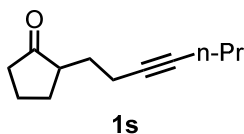

### 2-(Hept-3-yn-1-yl)cyclopentan-1-one (1s)

2-(Hept-3-yn-1-yl)cyclopentan-1-one was prepared following the **General Procedure B** starting with 20 mmol of cyclopentanone. The product was obtained as a brown oil (2.8 g, 78% yield). **<sup>1</sup>H NMR** (500 MHz, CDCl<sub>3</sub>) δ 2.37–2.17 (m, 5H), 2.17 – 2.07 (m, 3H), 2.07 – 1.91 (m, 2H), 1.79 (d, *J* = 9.0 Hz, 1H), 1.58 – 1.38 (m, 4H), 0.96 (t, *J* = 7.8 Hz, 3H); **<sup>13</sup>C NMR** (151 MHz, CDCl<sub>3</sub>) δ 223.66, 83.51, 81.83, 50.87, 40.73, 32.06, 31.77, 25.08, 23.37, 23.35, 19.67, 16.10; **IR** (neat) 2958, 2930, 2868, 1734, 1452, 1153 cm<sup>-1</sup>; **HRMS** (DART) *m/z* Calcd for C<sub>12</sub>H<sub>19</sub>O (MH<sup>+</sup>): 179.14304; found: 179.14191.



## 2.2 Preparation Chiral ZnI<sub>2</sub>/BOX Complexes

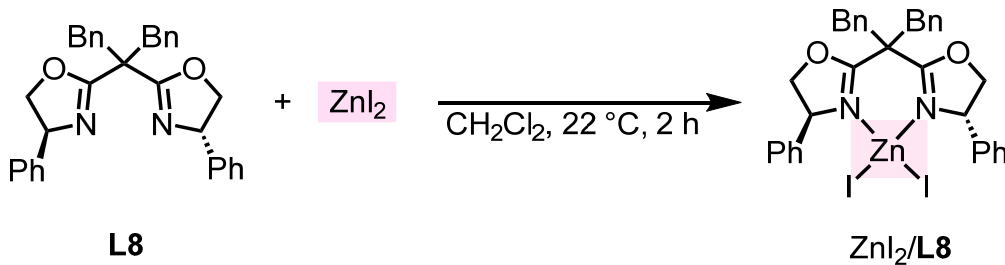

Chiral ZnI<sub>2</sub>/BOX complex (ZnI<sub>2</sub>/**L8**) was prepared according to a literature procedure.<sup>2,15</sup> To a 25 mL oven-dried sealed tube was added (4*S*,4'*S*)-2,2'-(1,3-diphenylpropane-2,2-diyl)bis(4-phenyl-4,5-dihydrooxazole) (**L8**, 973 mg, 2.0 mmol), ZnI<sub>2</sub> (766 mg, 2.4 mmol), and CH<sub>2</sub>Cl<sub>2</sub> (10 mL) under nitrogen atmosphere. The resulting mixture was allowed to stir at 22 °C for 2 h. Upon completion, the solution was transferred to a syringe fitted with a 0.22 μm PTFE filter and filtered under nitrogen into a Schlenk tube. The solvent was removed *in vacuo* to deliver **ZnI<sub>2</sub>/L8** complex as a pale yellow solid (1.5 g, 95% yield).

<sup>1</sup>H NMR (500 MHz, CDCl<sub>3</sub>) δ 7.51 – 7.42 (m, 6H), 7.28 – 7.21 (m, 2H), 7.21 – 7.11 (m, 8H), 6.62 (d, *J* = 7.5 Hz, 4H), 5.69 (t, *J* = 10.5 Hz, 2H), 4.96 (t, *J* = 9.8 Hz, 2H), 4.22 (t, *J* = 9.7 Hz, 2H), 3.91 (d, *J* = 14.2 Hz, 2H), 3.44 (d, *J* = 14.2 Hz, 2H). <sup>13</sup>C NMR (126 MHz, CDCl<sub>3</sub>) δ 168.43, 135.45, 133.74, 130.04, 129.21, 128.95, 128.88, 128.39, 128.24, 75.40, 68.43, 51.85, 44.63.

## 2.3 Optimization Studies

### Experimental Procedure for Optimization of Racemic Conia-Ene-Type Reaction

(see Tables SI-1 and SI-2)

To a 7.0 mL oven-dried vial was added Lewis acid Co-catalyst, 1-phenylhept-5-yn-1-one **1a** (37.2 mg, 0.2 mmol), B(C<sub>6</sub>F<sub>5</sub>)<sub>3</sub>, PMP, and solvent (1.0 mL) under nitrogen atmosphere. The resulting mixture was allowed to stir at 22 °C or 80 °C for 12 h. Upon completion, the reaction mixture was diluted with CH<sub>2</sub>Cl<sub>2</sub>, and concentrated *in vacuo*. The product yield was determined by the <sup>1</sup>H NMR analysis of the unpurified product mixture using mesitylene as the internal standard.

**Table SI-1.** Evaluation of Lewis Acid Co-Catalyst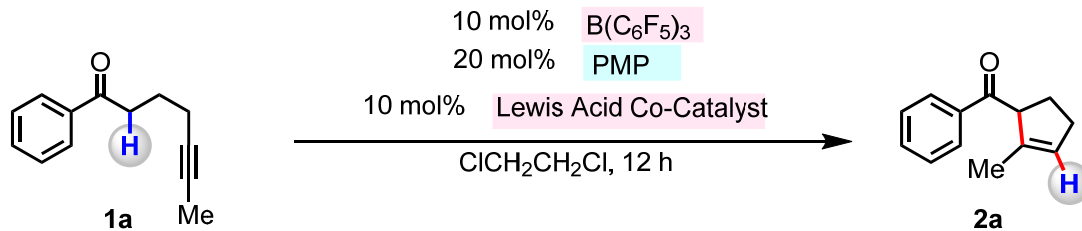

| entry | Lewis Acid Co-Catalyst                                              | Reaction temperature (°C) | yield of <b>2a</b> (%) |
|-------|---------------------------------------------------------------------|---------------------------|------------------------|
| 1     | AgOTf                                                               | 80                        | 16                     |
| 2     | Mg(OTf) <sub>2</sub>                                                | 80                        | 0                      |
| 3     | In(OTf) <sub>3</sub>                                                | 80                        | 13                     |
| 4     | Yb(OTf) <sub>3</sub>                                                | 80                        | 0                      |
| 5     | CuOTf                                                               | 80                        | 15                     |
| 6     | [Cu(OTf) <sub>2</sub> ] <sub>2</sub> •C <sub>6</sub> H <sub>6</sub> | 80                        | 18                     |
| 7     | AuPPh <sub>3</sub> Cl/AgOTf                                         | 80                        | 40                     |
| 8     | AuPPh <sub>3</sub> Cl                                               | 80                        | >95                    |
| 9     | Zn(OTf) <sub>2</sub>                                                | 80                        | 64                     |
| 10    | ZnCl <sub>2</sub>                                                   | 80                        | >95                    |
| 11    | ZnI <sub>2</sub>                                                    | 80                        | >95                    |
| 12    | Zn(OAc) <sub>2</sub>                                                | 80                        | >95                    |
| 13    | Zn(NTf <sub>2</sub> ) <sub>2</sub>                                  | 80                        | 0                      |
| 14    | AuPPh <sub>3</sub> Cl                                               | 22                        | 0                      |
| 15    | ZnCl <sub>2</sub>                                                   | 22                        | 78                     |
| 16    | ZnI <sub>2</sub>                                                    | 22                        | >95                    |
| 17    | Zn(OAc) <sub>2</sub>                                                | 22                        | 15                     |

**Table SI-2.** Evaluation of Reaction Conditions and Control Experiments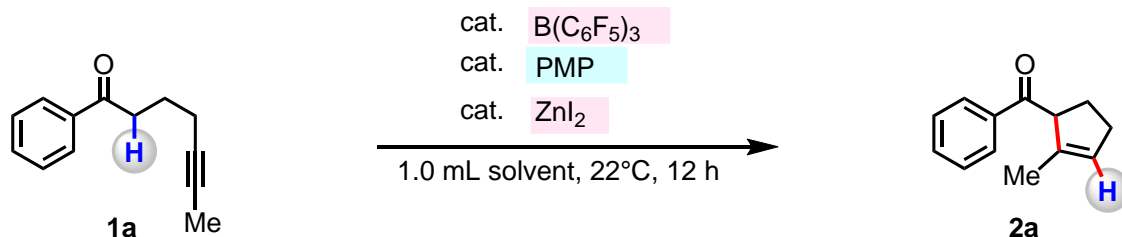

| entry | $\text{B}(\text{C}_6\text{F}_5)_3$<br>(mol%) | PMP<br>(mol%) | $\text{ZnI}_2$<br>(mol%) | solvent                             | yield of <b>2a</b><br>(%) |
|-------|----------------------------------------------|---------------|--------------------------|-------------------------------------|---------------------------|
| 1     | 10                                           | 20            | 10                       | $\text{CH}_2\text{Cl}_2$            | >95                       |
| 2     | 10                                           | none          | 10                       | $\text{CH}_2\text{Cl}_2$            | <5                        |
| 3     | none                                         | 20            | 10                       | $\text{CH}_2\text{Cl}_2$            | 0                         |
| 4     | 10                                           | 20            | none                     | $\text{CH}_2\text{Cl}_2$            | 0                         |
| 5     | 5                                            | 10            | 5                        | $\text{CH}_2\text{Cl}_2$            | >95                       |
| 6     | 10                                           | 20            | 10                       | $\text{ClCH}_2\text{CH}_2\text{Cl}$ | >95                       |
| 7     | 10                                           | 20            | 10                       | THF                                 | 5                         |
| 8     | 10                                           | 20            | 10                       | Toluene                             | 80                        |

**Experimental Procedure for Optimization of BOX Ligands (See Table SI-3 and Table 2 in the manuscript)**

To a 7.0 mL oven-dried vial was added  $\text{ZnI}_2$  (0.02 mmol, 10 mol%), ligand (0.022 mmol, 11 mol%),  $\text{CH}_2\text{Cl}_2$  (0.5 mL) under nitrogen atmosphere. The mixture was allowed to stir for 30 minutes at 22 °C. Subsequently, 1-phenylpent-4-yn-1-one **1a** (0.20 mmol),  $\text{B}(\text{C}_6\text{F}_5)_3$  (0.02 mmol), PMP (0.04 mmol), and  $\text{CH}_2\text{Cl}_2$  (0.5 mL) were added to the vial under nitrogen atmosphere, and the resulting mixture was allowed to stir at 22 °C for 12 h. Upon completion, the reaction mixture was diluted with  $\text{CH}_2\text{Cl}_2$ , concentrated *in vacuo*. The product yield was determined by the  $^1\text{H}$  NMR analysis of the unpurified product mixture using mesitylene as the internal standard. The product was purified by preparative TLC (hexanes:EtOAc = 10:1).

The er values of product **2a** was determined by HPLC analysis of the isolated and purified product.

**Table SI-3.** Evaluation of Chiral Ligands

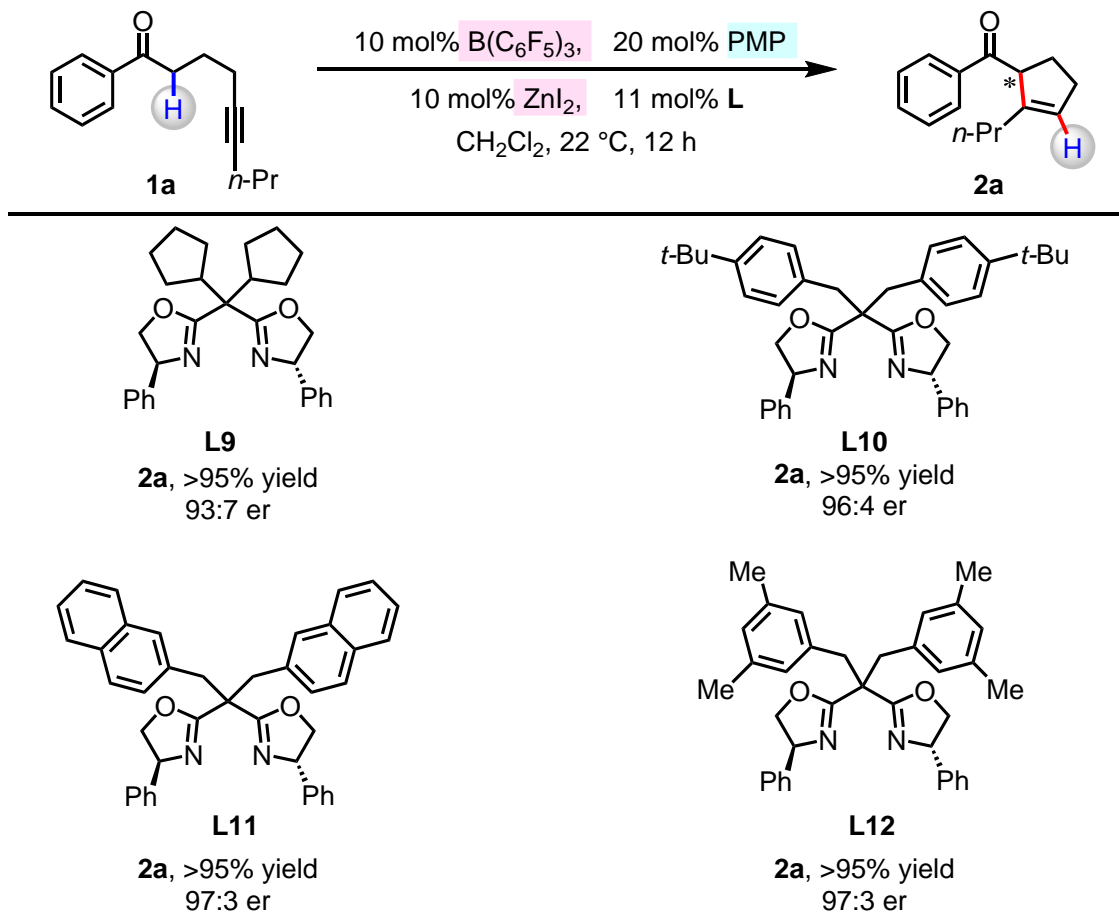

### Experiments for Evaluation of Substrate Structure

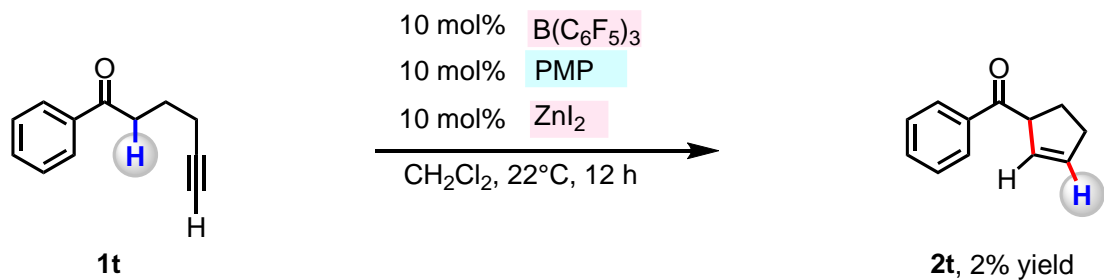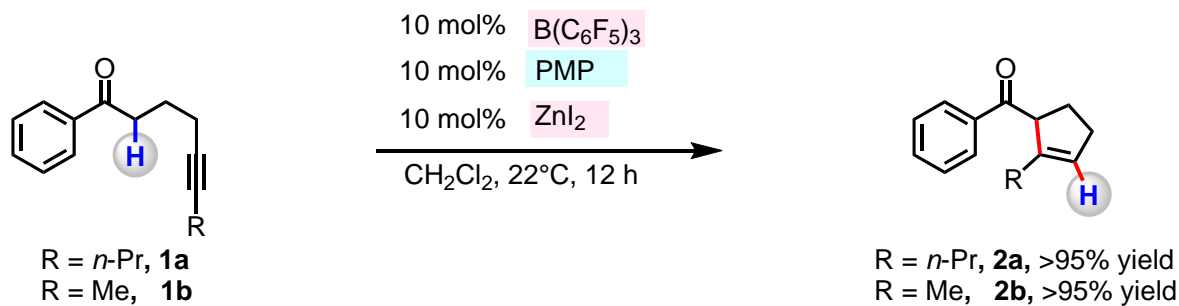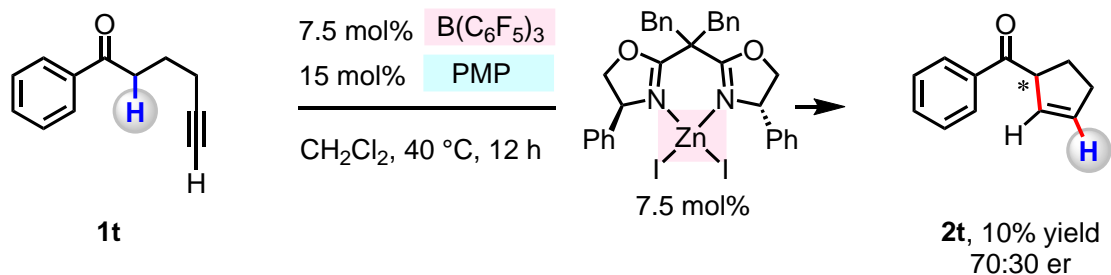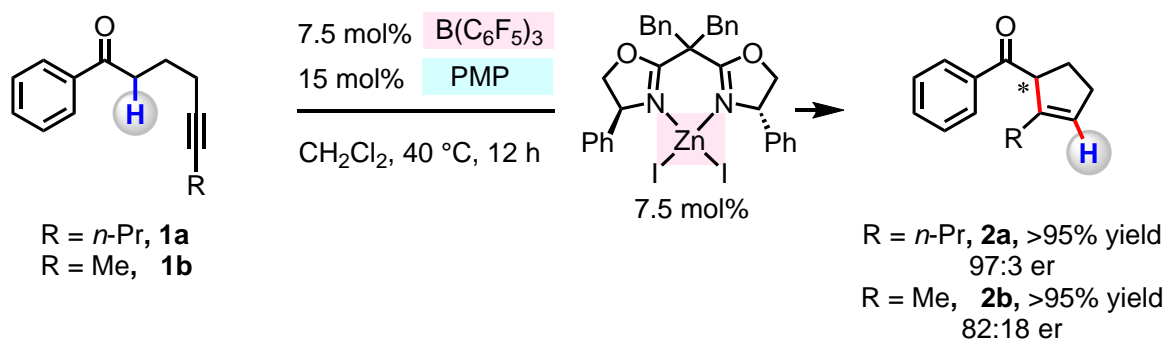

## 2.4 General Procedures for the Enantioselective Conia-Ene-Type Reaction (See Table 1, Table 3 and Table 4 in the manuscript)

### General Procedure C

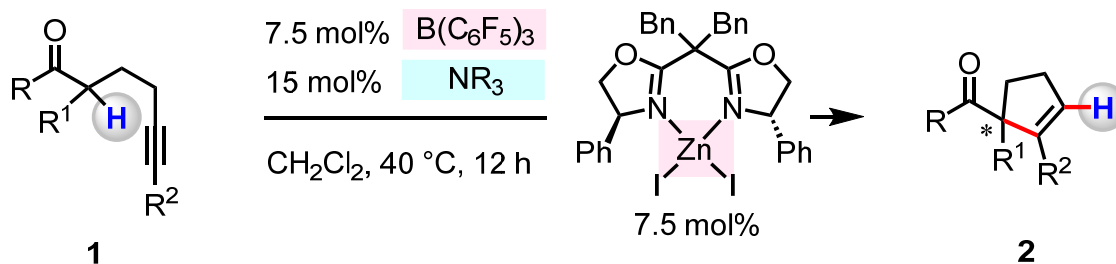

To a 7.0 mL oven-dried vial was added substrate **1** (0.2 mmol),  $ZnI_2/L8$  (7.5 mol%),  $B(C_6F_5)_3$  (7.5 mol%), PMP or *N*-methylpiperidine (15 mol%), and  $CH_2Cl_2$  (1.0 mL) under nitrogen atmosphere. The resulting mixture was allowed to stir at 40 °C for 12 h. Upon completion, the reaction mixture was diluted with  $CH_2Cl_2$ , concentrated *in vacuo* and purified by silica gel column chromatography.

### General Procedure D

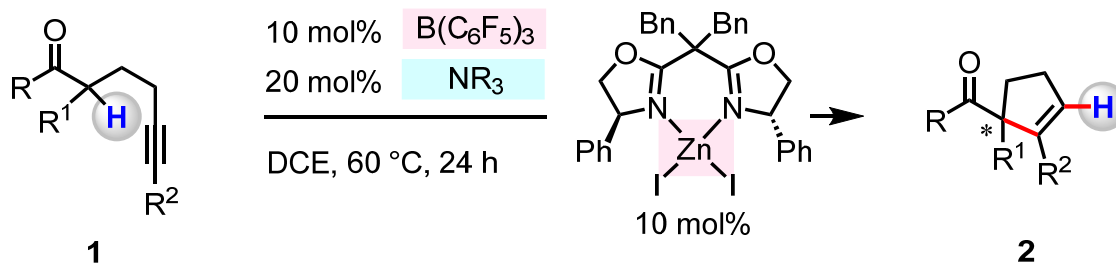

To a 7.0 mL oven-dried vial was added substrate **1** (0.2 mmol),  $ZnI_2/L8$  (10 mol%),  $B(C_6F_5)_3$  (10 mol%), PMP or *N*-methylpiperidine (20 mol%), and DCE (1.0 mL) under nitrogen atmosphere. The resulting mixture was allowed to stir at 60 °C for 24 h. Upon completion, the reaction mixture was diluted with  $CH_2Cl_2$ , concentrated *in vacuo* and purified by silica gel column chromatography.

## 2.5 Procedure for Large Scale Reaction

To a 25 mL oven-dried sealed tube was added substrate 1-phenylnon-5-yn-1-one **1a** (1.5 g, 7 mmol), ZnI<sub>2</sub>/**L8** (141 mg, 0.175 mmol, 2.5 mol%), B(C<sub>6</sub>F<sub>5</sub>)<sub>3</sub> (179 mg, 0.350 mmol, 5.0 mol%), PMP (109 mg, 0.700 mmol, 10 mol%), and CH<sub>2</sub>Cl<sub>2</sub> (10 mL) under nitrogen atmosphere. The resulting mixture was allowed to stir at 40 °C for 24 h. Upon completion, the solvent was removed *in vacuo* and purification by silica gel column chromatography gave the product as a pale yellow oil (1.4 g, 94% yield, 97:3 er). The er value was determined by HPLC analysis of the isolated and purified product.



### 3. Analytical Data

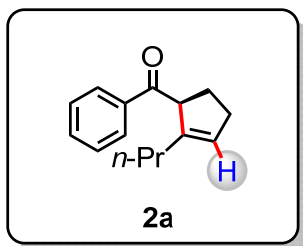

#### (*S*)-Phenyl(2-propylcyclopent-2-en-1-yl)methanone (**2a**)

According to the General Procedure **C**, 1-phenylnon-5-yn-1-one **1a** (42.9 mg, 0.2 mmol) was subjected to the Conia-ene-type reaction using PMP as the Brønsted base catalyst. The product was purified by silica gel column chromatography (1.0 % EtOAc in hexanes) to give **2a** (42.0 mg, 98%) as a colorless oil.  $^1\text{H NMR}$  (500 MHz,  $\text{CDCl}_3$ )  $\delta$  8.00 (d,  $J = 7.1$  Hz, 2H), 7.56 (t,  $J = 7.4$  Hz, 1H), 7.47 (t,  $J = 7.6$  Hz, 2H), 5.71 – 5.58 (m, 1H), 4.42 (t,  $J = 7.6$  Hz, 1H), 2.55 – 2.44 (m, 1H), 2.44 – 2.37 (m, 1H), 2.37 – 2.26 (m, 1H), 2.12 – 2.00 (m, 2H), 2.00 – 1.89 (m, 1H), 1.52 – 1.35 (m, 2H), 0.86 (t,  $J = 7.3$  Hz, 3H);  $^{13}\text{C NMR}$  (126 MHz,  $\text{CDCl}_3$ )  $\delta$  202.56, 143.21, 137.18, 132.88, 128.57, 128.48, 127.29, 54.88, 32.12, 31.65, 29.68, 20.89, 13.98; **IR** (neat) 2956, 2929, 2869, 1707, 1676, 1447, 1314, 1258, 1069, 710, 699  $\text{cm}^{-1}$ ; **HRMS** (DART)  $m/z$  Calcd for  $\text{C}_{15}\text{H}_{19}\text{O}$  ( $\text{MH}^+$ ): 215.1430; found: 215.1427; **HPLC** (Chiralcel OD-H; 1%/99% isopropanol/ hexanes, 0.5 mL/min;  $t_r = 9.8$  min (major), 10.9 min (minor); 97:3 er).  $[\alpha]_D^{25} = -19.6^\circ$  ( $c = 1.0$ ,  $\text{CH}_2\text{Cl}_2$ ). For the determination of absolute configuration, see section **SI-4**.

```

Acq. Operator   : SYSTEM                      Seq. Line :    1
Acq. Instrument : Wasa_LC1                    Location  :   93
Injection Date  : 9/19/2018 2:20:51 PM       Inj       :    1
                                                    Inj Volume: 4.000 µl
Method          : C:\Chem32\1\Data\JOE 2018-09-19 14-19-45\column3 1%IPA 99% hexane 20min-0.5mL.M (Sequence Method)
Last changed    : 9/19/2018 2:19:47 PM by SYSTEM
Method Info     : Column3 20min-1% iPrOH 99% hexane-0.5mL

```

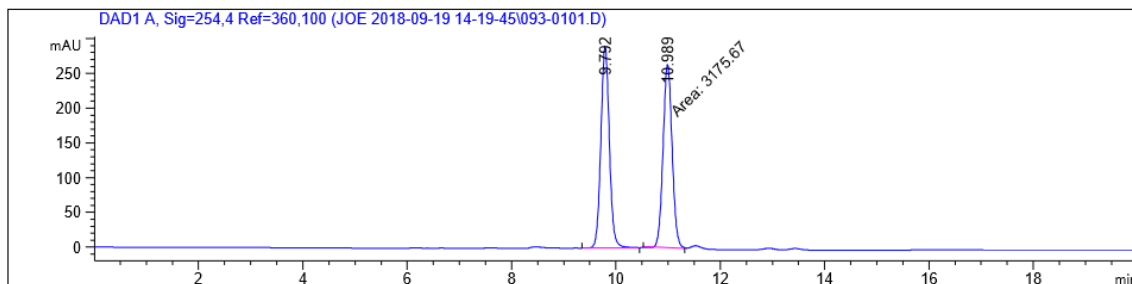

Signal 1: DAD1 A, Sig=254,4 Ref=360,100

| Peak # | RetTime [min] | Type | Width [min] | Area [mAU*s] | Height [mAU] | Area %  |
|--------|---------------|------|-------------|--------------|--------------|---------|
| 1      | 9.792         | BB   | 0.1738      | 3275.03320   | 289.89484    | 50.7702 |
| 2      | 10.989        | MM   | 0.2007      | 3175.66724   | 263.68991    | 49.2298 |

Totals : 6450.70044 553.58475

```

Acq. Operator   : SYSTEM                      Seq. Line :    2
Acq. Instrument : Wasa_LC1                   Location  :   32
Injection Date  : 10/3/2018 6:37:25 PM      Inj       :    1
                                                Inj Volume: 4.000 µl
Method          : C:\Chem32\1\Data\JOE 2018-10-03 18-14-37\column3 1%IPA 99% hexane 20min-0.5mL.M (Sequence Method)
Last changed    : 10/3/2018 6:14:40 PM by SYSTEM
Method Info     : Column3 20min-1% iProH 99% hexane-0.5mL
  
```

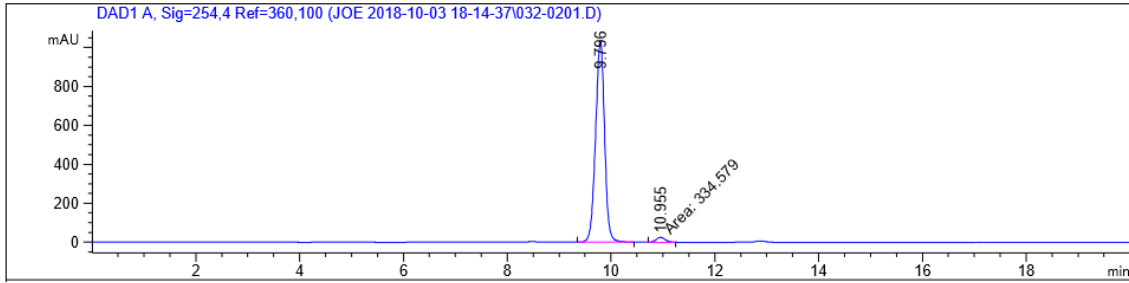

Signal 1: DAD1 A, Sig=254,4 Ref=360,100

| Peak # | RetTime [min] | Type | Width [min] | Area [mAU*s] | Height [mAU] | Area %  |
|--------|---------------|------|-------------|--------------|--------------|---------|
| 1      | 9.796         | BB   | 0.1868      | 1.24999e4    | 1035.63757   | 97.3931 |
| 2      | 10.955        | MM   | 0.2156      | 334.57858    | 25.86999     | 2.6069  |

Totals :                                1.28345e4    1061.50756

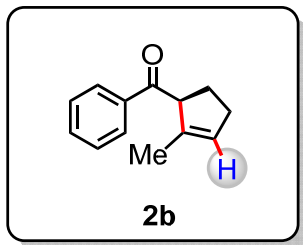

**(S)-(2-Methylcyclopent-2-en-1-yl)(phenyl)methanone (2b)**

According to the General Procedure C, 1-phenylhept-5-yn-1-one **1b** (37.2 mg, 0.2 mmol) was subjected to the Conia-ene-type reaction using PMP as the Brønsted base catalyst. The product was purified by silica gel column chromatography (1.0 % EtOAc in hexanes) to give **2b** (35.7 mg, 96%) as a colorless oil. **<sup>1</sup>H NMR** (500 MHz, CDCl<sub>3</sub>) δ 8.01 (d, *J* = 8.1 Hz, 2H), 7.56 (t, *J* = 7.9 Hz, 1H), 7.47 (t, *J* = 7.6 Hz, 2H), 5.67 – 5.56 (m, 1H), 4.37 (t, *J* = 7.3 Hz, 1H), 2.53 – 2.43 (m, 1H), 2.43 – 2.30 (m, 2H), 2.14 – 2.05 (m, 1H), 1.70 (s, 3H); **<sup>13</sup>C NMR** (126 MHz, CDCl<sub>3</sub>) δ 205.48, 141.63, 140.32, 136.09, 131.93, 131.75, 131.70, 59.32, 34.93, 32.87, 18.98; **IR** (neat) 3057, 2928, 1704, 1674, 1578, 1345, 1175, 1111, 1000, 775, 697 cm<sup>-1</sup>; **HRMS** (DART) *m/z* Calcd for C<sub>13</sub>H<sub>15</sub>O (MH<sup>+</sup>): 187.1117; found: 187.1114; **HPLC** (Chiralcel OD-H; 1%/ 99% isopropanol/ hexanes, 0.5 mL/min; *t<sub>r</sub>* = 11.5 min (major), 13.6 min (minor); 82:18 er); [*α*]<sub>D</sub><sup>25</sup> = -36.7° (*c* = 1.0, CH<sub>2</sub>Cl<sub>2</sub>). The absolute configuration for this product was assigned in analogy to that determined for product **2a**.

```

Acq. Operator   : SYSTEM                      Seq. Line :    2
Acq. Instrument : Wasa_LC1                    Location  :   81
Injection Date  : 4/25/2018 10:15:40 PM      Inj       :    1
                                           Inj Volume: 4.000 µl
Method          : C:\Chem32\1\Data\JOE 2018-04-25 21-13-41\column2 1%IPA 99% hexane 60min-0.5mL.M (Sequence Method)
Last changed    : 4/25/2018 9:13:43 PM by SYSTEM
Method Info     : Column2 60min-1% iPrOH 99% hexane-0.5mL

```

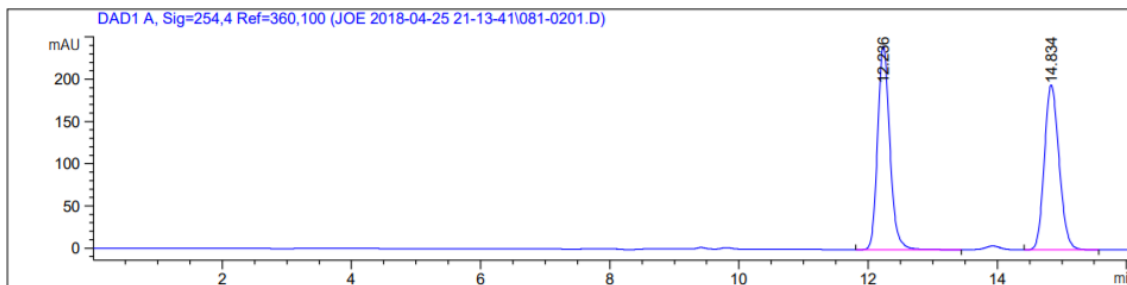

Signal 1: DAD1 A, Sig=254,4 Ref=360,100

| Peak # | RetTime [min] | Type | Width [min] | Area [mAU*s] | Height [mAU] | Area %  |
|--------|---------------|------|-------------|--------------|--------------|---------|
| 1      | 12.236        | BB   | 0.2038      | 3175.99268   | 240.84023    | 50.6041 |
| 2      | 14.834        | BB   | 0.2474      | 3100.15894   | 195.06850    | 49.3959 |

Totals :                                  6276.15161    435.90872

Acq. Operator : SYSTEM  
 Acq. Instrument : Wasa\_LC1  
 Injection Date : 10/3/2018 8:42:17 PM  
 Seq. Line : 7  
 Location : 38  
 Inj : 1  
 Inj Volume : 4.000 µl  
 Method : C:\Chem32\1\Data\JOE 2018-10-03 18-14-37\column3 1%IPA 99% hexane 20min-0.5mL.M (Sequence Method)  
 Last changed : 10/3/2018 6:14:40 PM by SYSTEM  
 Method Info : Column3 20min-1% iPrOH 99% hexane-0.5mL  
 Additional Info : Peak(s) manually integrated

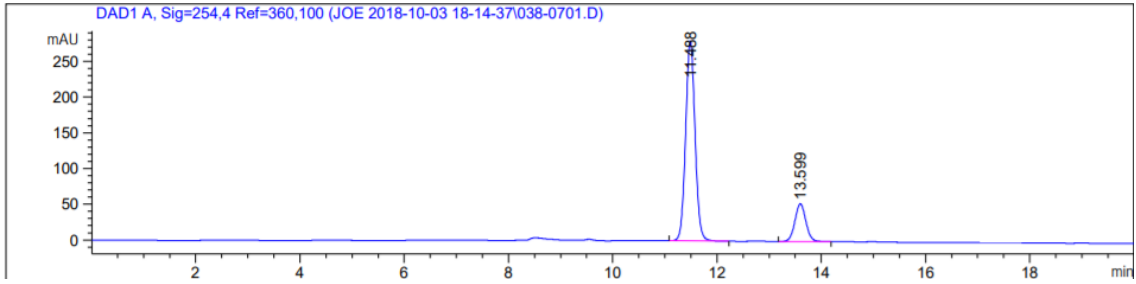

Signal 1: DAD1 A, Sig=254,4 Ref=360,100

| Peak # | RetTime [min] | Type | Width [min] | Area [mAU*s] | Height [mAU] | Area %  |
|--------|---------------|------|-------------|--------------|--------------|---------|
| 1      | 11.488        | BB   | 0.1941      | 3508.73730   | 280.17123    | 81.9336 |
| 2      | 13.599        | BB   | 0.2247      | 773.67737    | 52.87839     | 18.0664 |

Totals : 4282.41467 333.04962

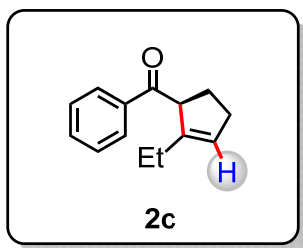

**(S)-(2-Ethylcyclopent-2-en-1-yl)(phenyl)methanone (2c)**

According to the General Procedure C, 1-phenyloct-5-yn-1-one **1c** (40.0 mg, 0.2 mmol) was subjected to the Conia-ene-type reaction using PMP as the Brønsted base catalyst. The product was purified by silica gel column chromatography (1.0 % EtOAc in hexanes) to give **2c** (38.0 mg, 95%) as a colorless oil. **<sup>1</sup>H NMR** (500 MHz, CDCl<sub>3</sub>) δ 8.00 (d, *J* = 7.2 Hz, 2H), 7.56 (t, *J* = 7.4 Hz, 1H), 7.47 (t, *J* = 7.6 Hz, 2H), 5.64 (q, *J* = 1.8 Hz, 1H), 4.43 (t, *J* = 7.8 Hz, 1H), 2.57 – 2.45 (m, 1H), 2.44 – 2.26 (m, 2H), 2.16 – 2.03 (m, 2H), 2.01 – 1.88 (m, 1H), 1.03 (t, *J* = 7.4 Hz, 3H); **<sup>13</sup>C NMR** (126 MHz, CDCl<sub>3</sub>) δ 202.57, 144.90, 137.21, 132.88, 128.57, 128.49, 126.31, 55.04, 31.62, 29.66, 23.10, 12.20; **IR** (neat) 2933, 2876, 2850, 1706, 1675, 1446, 1272, 1023, 1001, 700, 647 cm<sup>-1</sup>; **HRMS** (DART) *m/z* Calcd for C<sub>14</sub>H<sub>17</sub>O (MH<sup>+</sup>): 201.1274; found: 201.1264; **HPLC** (Chiralcel OD-H; 1%/ 99% isopropanol/ hexanes, 0.5 mL/min; tr = 10.3 min (major), 12.4 min (minor); 96:4 er); [α]<sub>D</sub><sup>25</sup> = -23.1° (c = 1.0, CH<sub>2</sub>Cl<sub>2</sub>). The absolute configuration for this product was assigned in analogy to that determined for product **2a**.







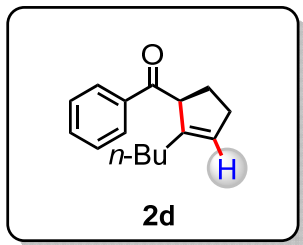

**(S)-(2-Butylcyclopent-2-en-1-yl)(phenyl)methanone (2d)**

According to the General Procedure C, 1-phenyldec-5-yn-1-one **1d** (45.7 mg, 0.2 mmol) was subjected to the Conia-ene-type reaction using PMP as the Brønsted base catalyst. The product was purified by silica gel column chromatography (1.0 % EtOAc in hexanes) to give **2d** (45.2 mg, 99%) as a colorless oil. **<sup>1</sup>H NMR** (500 MHz, CDCl<sub>3</sub>) δ 8.00 (d, *J* = 7.1 Hz, 2H), 7.56 (t, *J* = 7.4 Hz, 1H), 7.47 (t, *J* = 7.6 Hz, 2H), 5.64 (d, *J* = 1.6 Hz, 1H), 4.42 (t, *J* = 7.9 Hz, 1H), 2.54 – 2.44 (m, 1H), 2.44 – 2.28 (m, 2H), 2.15 – 2.01 (m, 2H), 1.99 – 1.89 (m, 1H), 1.45 – 1.35 (m, 2H), 1.33 – 1.18 (m, 2H), 0.84 (t, *J* = 7.3 Hz, 3H); **<sup>13</sup>C NMR** (126 MHz, CDCl<sub>3</sub>) δ 202.57, 143.40, 137.20, 132.87, 128.56, 128.49, 127.14, 54.94, 31.64, 29.88, 29.66, 22.52, 13.89; **IR** (neat) 2953, 2927, 2857, 1707, 1676, 1342, 1109, 931, 859, 699, 669 cm<sup>-1</sup>; **HRMS** (DART) *m/z* Calcd for C<sub>16</sub>H<sub>21</sub>O (MH<sup>+</sup>): 229.1587; found: 229.1582; **HPLC** (Chiralcel OD-H; 1%/ 99% isopropanol/ hexanes, 0.5 mL/min; tr = 9.7 min (major), 10.3 min (minor); 97:3 er); [α]<sub>D</sub><sup>25</sup> = -31.4° (c = 1.0, CH<sub>2</sub>Cl<sub>2</sub>). The absolute configuration for this product was assigned in analogy to that determined for product **2a**.

Acq. Operator : SYSTEM  
Acq. Instrument : Wasa\_LC1  
Injection Date : 11/19/2018 2:32:22 PM  
Method : C:\Chem32\1\Data\JOE 2018-11-19 14-30-30\column3 1%IPA 99% hexane 20min-0.5mL.M (Sequence Method)  
Last changed : 11/19/2018 2:30:33 PM by SYSTEM  
Method Info : Column3 20min-1% iPrOH 99% hexane-0.5mL

Seq. Line : 1  
Location : 81  
Inj : 1  
Inj Volume : 4.000 µl

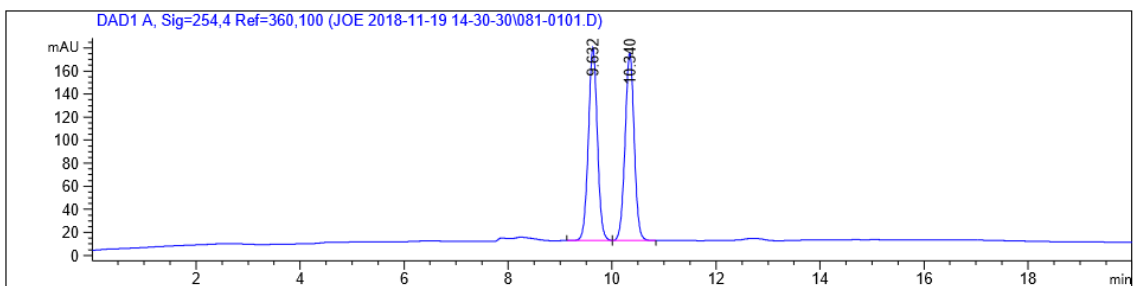

Signal 1: DAD1 A, Sig=254,4 Ref=360,100

| Peak #   | RetTime [min] | Type | Width [min] | Area [mAU*s] | Height [mAU] | Area %  |
|----------|---------------|------|-------------|--------------|--------------|---------|
| 1        | 9.632         | BB   | 0.1864      | 2012.38794   | 167.17357    | 50.2800 |
| 2        | 10.340        | BB   | 0.1886      | 1989.97559   | 162.84615    | 49.7200 |
| Totals : |               |      |             | 4002.36353   | 330.01971    |         |



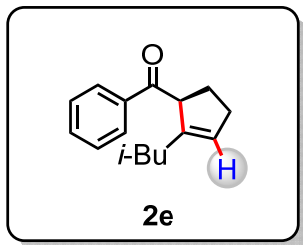

**(S)-(2-Isobutylcyclopent-2-en-1-yl)(phenyl)methanone (2e)**

According to the General Procedure **D**, 8-methyl-1-phenylnon-5-yn-1-one **1e** (45.7 mg, 0.2 mmol) was subjected to the Conia-ene-type reaction using PMP as the Brønsted base catalyst. The product was purified by silica gel column chromatography (1.0 % EtOAc in hexanes) to give **2e** (44.4 mg, 97%) as a colorless oil. <sup>1</sup>H NMR (500 MHz, CDCl<sub>3</sub>) δ 7.99 (d, *J* = 7.1 Hz, 2H), 7.56 (t, *J* = 7.4 Hz, 1H), 7.47 (t, *J* = 7.8 Hz, 2H), 5.86 – 5.45 (m, 1H), 4.40 (t, *J* = 7.5 Hz, 1H), 2.56 – 2.44 (m, 1H), 2.44 – 2.27 (m, 2H), 2.10 – 1.99 (m, 1H), 1.96 – 1.89 (m, 2H), 1.74 – 1.62 (m, 1H), 0.97 – 0.70 (m, 6H); <sup>13</sup>C NMR (126 MHz, CDCl<sub>3</sub>) δ 202.55, 142.17, 137.20, 132.87, 128.67, 128.57, 128.48, 54.68, 39.35, 31.61, 29.75, 26.42, 23.14, 22.06; IR (neat) 2949, 2924, 2864, 1676, 1461, 1445, 1364, 1205, 958, 849, 779 cm<sup>-1</sup>; HRMS (DART) *m/z* Calcd for C<sub>16</sub>H<sub>21</sub>O (MH<sup>+</sup>): 229.1587; found: 229.1576; HPLC (Chiralcel OD-H; 1%/ 99% isopropanol/ hexanes, 0.5 mL/min; tr = 9.2 min (major), 9.9 min (minor); 96:4 er); [α]<sub>D</sub><sup>25</sup> = -24.9° (c = 1.0, CH<sub>2</sub>Cl<sub>2</sub>). The absolute configuration for this product was assigned in analogy to that determined for product **2a**.

```

Acq. Operator   : SYSTEM                      Seq. Line :    4
Acq. Instrument : Wasa_LC1                    Location  :   12
Injection Date  : 11/20/2018 9:34:41 PM      Inj       :    1
                                           Inj Volume: 4.000 µl
Method          : C:\Chem32\1\Data\JOE 2018-11-20 18-49-49\column3 1%IPA 99% hexane 20min-0.5mL.M (Sequence Method)
Last changed    : 11/20/2018 6:49:53 PM by SYSTEM
Method Info     : Column3 20min-1% iPrOH 99% hexane-0.5mL

```

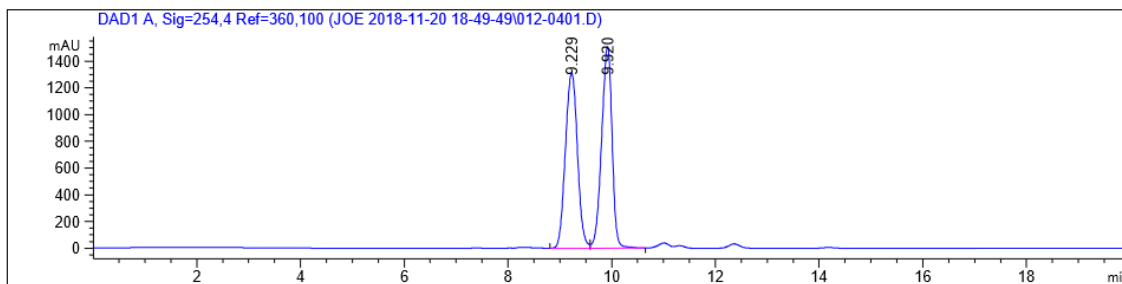

Signal 1: DAD1 A, Sig=254,4 Ref=360,100

| Peak # | RetTime [min] | Type | Width [min] | Area [mAU*s] | Height [mAU] | Area %  |
|--------|---------------|------|-------------|--------------|--------------|---------|
| 1      | 9.229         | BV   | 0.2560      | 2.11567e4    | 1313.11548   | 50.0211 |
| 2      | 9.920         | VB   | 0.2194      | 2.11388e4    | 1508.86450   | 49.9789 |

Totals :                                    4.22955e4   2821.97998

Acq. Operator : SYSTEM                                               Seq. Line : 5  
 Acq. Instrument : Wasa\_LC1                                            Location : 13  
 Injection Date : 11/20/2018 9:55:37 PM                            Inj : 1  
                                                                                               Inj Volume : 4.000 µl  
 Method : C:\Chem32\1\Data\JOE 2018-11-20 18-49-49\column3 1%IPA 99% hexane 20min-0.5mL.M (Sequence Method)  
 Last changed : 11/20/2018 6:49:53 PM by SYSTEM  
 Method Info : Column3 20min-1% iPrOH 99% hexane-0.5mL

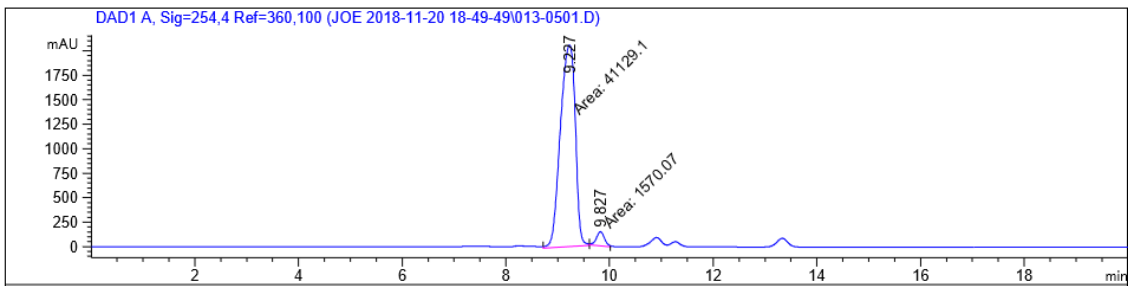

Signal 1: DAD1 A, Sig=254,4 Ref=360,100

| Peak #   | RetTime [min] | Type | Width [min] | Area [mAU*s] | Height [mAU] | Area %  |
|----------|---------------|------|-------------|--------------|--------------|---------|
| 1        | 9.227         | MM   | 0.3331      | 4.11291e4    | 2058.13403   | 96.3230 |
| 2        | 9.827         | MM   | 0.1823      | 1570.07068   | 143.57298    | 3.6770  |
| Totals : |               |      |             | 4.26992e4    | 2201.70702   |         |

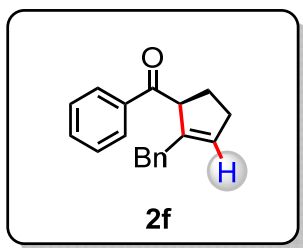

**(S)-(2-Benzylcyclopent-2-en-1-yl)(phenyl)methanone (2f)**

According to the General Procedure **D**, 1,7-diphenylhept-5-yn-1-one **1f** (52.5 mg, 0.2 mmol) was subjected to the Conia-ene-type reaction using PMP as the Brønsted base catalyst. The product was purified by silica gel column chromatography (1.0 % EtOAc in hexanes) to give **2f** (43.2 mg, 80%) as a colorless oil. **<sup>1</sup>H NMR** (500 MHz, CDCl<sub>3</sub>) δ 7.88 (d, *J* = 7.4 Hz, 2H), 7.54 (t, *J* = 7.4 Hz, 1H), 7.42 (t, *J* = 7.7 Hz, 2H), 7.23 (dd, *J* = 13.4, 6.3 Hz, 2H), 7.16 (t, *J* = 7.3 Hz, 1H), 7.09 (d, *J* = 7.2 Hz, 2H), 5.62 (s, 1H), 4.38 – 4.25 (m, 1H), 3.56 (d, *J* = 15.5 Hz, 1H), 3.23 (d, *J* = 15.4 Hz, 1H), 2.56 – 2.44 (m, 1H), 2.44 – 2.27 (m, 2H), 2.10 – 2.01 (m, 1H); **<sup>13</sup>C NMR** (126 MHz, CDCl<sub>3</sub>) δ 202.41, 142.36, 139.41, 137.03, 132.92, 129.75, 128.98, 128.53, 128.51, 128.29, 126.03, 53.91, 36.64, 31.59, 29.79; **IR** (neat) 3058, 3024, 2931, 1674, 1594, 1447, 1211, 1072, 1025, 758, 700 cm<sup>-1</sup>; **HRMS** (DART) *m/z* Calcd for C<sub>19</sub>H<sub>19</sub>O (MH<sup>+</sup>): 263.1430; found: 263.1431; **HPLC** (Chiralcel OD-H; 1%/ 99% isopropanol/ hexanes, 0.5 mL/min; tr = 12.1 min (minor) , 13.2 min (major); 98:2 er); [α]<sub>D</sub><sup>25</sup> = -14.1° (c = 1.0, CH<sub>2</sub>Cl<sub>2</sub>). The absolute configuration for this product was assigned in analogy to that determined for product **2a**.







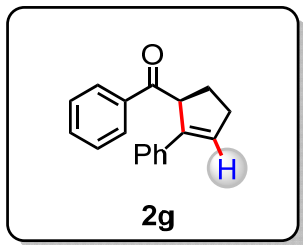

**(S)-Phenyl(2-phenylcyclopent-2-en-1-yl)methanone (2g)**

According to the General Procedure **D**, 1,6-diphenylhex-5-yn-1-one **1g** (49.6 mg, 0.2 mmol) was subjected to the Conia-ene-type reaction using PMP as the Brønsted base catalyst. The product was purified by silica gel column chromatography (1.0 % Et<sub>2</sub>O in hexanes) to give **2g** (24.8 mg, 50%) as a colorless solid. <sup>1</sup>H NMR (600 MHz, CDCl<sub>3</sub>) δ 8.06 (d, *J* = 7.6 Hz, 2H), 7.59 (t, *J* = 7.4 Hz, 1H), 7.50 (t, *J* = 7.7 Hz, 2H), 7.29 (d, *J* = 7.5 Hz, 2H), 7.22 (t, *J* = 7.7 Hz, 2H), 7.16 (t, *J* = 7.3 Hz, 1H), 6.49 – 6.44 (m, 1H), 4.95 (d, *J* = 11.7 Hz, 1H), 2.73 – 2.50 (m, 3H), 2.17 – 2.10 (m, 1H); <sup>13</sup>C NMR (126 MHz, CDCl<sub>3</sub>) δ 201.11, 141.64, 136.52, 135.57, 133.05, 130.12, 128.69, 128.65, 128.37, 127.07, 125.78, 53.48, 32.39, 30.06; IR (neat) 3052, 3025, 2937, 2843, 1678, 1577, 1445, 1207, 980, 752, 690 cm<sup>-1</sup>; HRMS (DART) *m/z* Calcd for C<sub>18</sub>H<sub>17</sub>O (MH<sup>+</sup>): 249.12739; found: 249.12799; HPLC (Chiralcel OD-H; 1%/ 99% isopropanol/ hexanes, 0.5 mL/min; tr = 20.6 min (minor), 26.6 min (major); 91:9 er); [α]<sup>25</sup><sub>D</sub> = -34.6° (c = 1.0, CH<sub>2</sub>Cl<sub>2</sub>). The absolute configuration for this product was assigned in analogy to that determined for product **2a**.





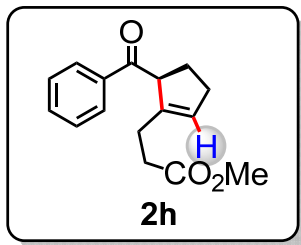

**Methyl (*S*)-3-(5-benzoylcyclopent-1-en-1-yl)propanoate (2h)**

According to the General Procedure C, methyl 9-oxo-9-phenylnon-4-ynoate **1h** (51.7 mg, 0.2 mmol) was subjected to the Conia-ene-type reaction using PMP as the Brønsted base catalyst. The product was purified by silica gel column chromatography (1.0 % EtOAc in hexanes) to give **2h** (50.1 mg, 97%) as a colorless oil. **<sup>1</sup>H NMR** (600 MHz, CDCl<sub>3</sub>) δ 8.00 (d, *J* = 8.0 Hz, 2H), 7.57 (t, *J* = 7.4 Hz, 1H), 7.48 (t, *J* = 7.7 Hz, 2H), 5.66 (s, 1H), 4.45 (d, *J* = 7.1 Hz, 1H), 3.63 (s, 3H), 2.54 – 2.44 (m, 3H), 2.44 – 2.35 (m, 3H), 2.34 – 2.27 (m, 1H), 2.13 – 1.96 (m, 1H); **<sup>13</sup>C NMR** (151 MHz, CDCl<sub>3</sub>) δ 204.66, 176.22, 144.01, 139.51, 135.69, 131.29, 131.18, 130.66, 57.68, 54.19, 35.13, 34.31, 32.34, 27.85; **IR** (neat) 2920, 2849, 1734, 1676, 1445, 1342, 1208, 1162, 1000, 701, 670 cm<sup>-1</sup>; **HRMS** (DART) *m/z* Calcd for C<sub>16</sub>H<sub>19</sub>O<sub>3</sub> (MH<sup>+</sup>): 259.1329; found: 259.1335; **HPLC** (Chiralcel OD-H; 5%/ 95% isopropanol/ hexanes, 1.0 mL/min; tr = 10.3 min (minor), 24.6 min (major); 94:6 er); [α]<sub>D</sub><sup>25</sup> = +1.7° (c = 1.0, CH<sub>2</sub>Cl<sub>2</sub>). The absolute configuration for this product was assigned in analogy to that determined for product **2a**.

```

Acq. Operator   : SYSTEM                      Seq. Line :    9
Acq. Instrument : Wasa_LC1                    Location  :    1
Injection Date  : 11/16/2018 6:02:44 AM      Inj       :    1
                                                    Inj Volume: 4.000 µl
Acq. Method     : C:\Chem32\1\Data\JOE 2018-11-15 21-53-08\column3 5% IPA 95% hex 60min-1.0ml
                                                    .M
Last changed    : 11/15/2018 9:53:12 PM by SYSTEM
Analysis Method : C:\Chem32\1\Data\JOE 2018-11-15 21-53-08\column3 5% IPA 95% hex 60min-1.0ml
                                                    .M (Sequence Method)

```

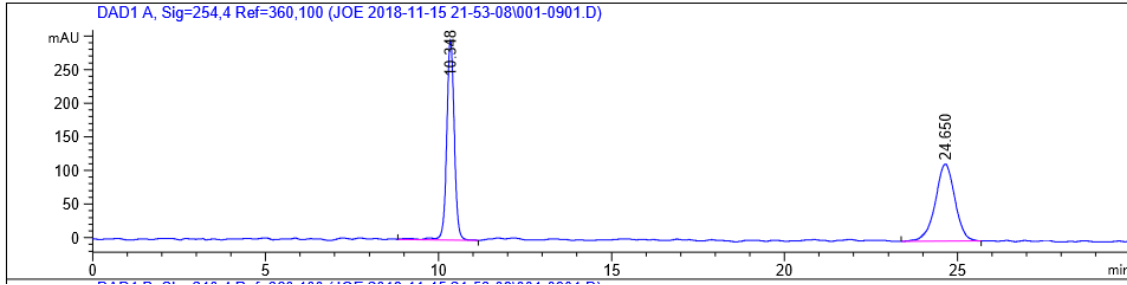

Signal 1: DAD1 A, Sig=254,4 Ref=360,100

| Peak # | RetTime [min] | Type | Width [min] | Area [mAU*s] | Height [mAU] | Area %  |
|--------|---------------|------|-------------|--------------|--------------|---------|
| 1      | 10.348        | VB R | 0.2295      | 4508.04883   | 297.70328    | 49.9701 |
| 2      | 24.650        | BB   | 0.5998      | 4513.44385   | 114.50896    | 50.0299 |

Totals :                                      9021.49268    412.21224





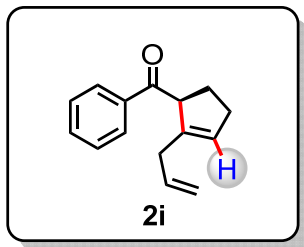

**(S)-(2-Allylcyclopent-2-en-1-yl)(phenyl)methanone (2i)**

According to the General Procedure C, 1-phenylnon-8-en-5-yn-1-one **1i** (42.5 mg, 0.2 mmol) was subjected to the Conia-ene-type reaction using PMP as the Brønsted base catalyst. The product was purified by silica gel column chromatography (1.0 % Et<sub>2</sub>O in hexanes) to give **2i** (40.0 mg, 94%) as a colorless oil. <sup>1</sup>H NMR (500 MHz, CDCl<sub>3</sub>) δ 7.99 (d, *J* = 8.7 Hz, 2H), 7.56 (t, *J* = 7.4 Hz, 1H), 7.47 (t, *J* = 7.7 Hz, 2H), 5.87 – 5.74 (m, 1H), 5.72 – 5.64 (m, 1H), 5.02 – 4.89 (m, 2H), 4.44 (t, *J* = 7.5 Hz, 1H), 2.91 (dd, *J* = 16.3, 6.0 Hz, 1H), 2.70 (dd, *J* = 16.2, 7.5 Hz, 1H), 2.55 – 2.45 (m, 1H), 2.44 – 2.30 (m, 2H), 2.11 – 2.00 (m, 1H); <sup>13</sup>C NMR (126 MHz, CDCl<sub>3</sub>) δ 202.29, 141.28, 137.10, 135.78, 132.95, 128.80, 128.57, 128.52, 116.14, 54.42, 34.61, 31.68, 29.68; IR (neat) 3059, 2936, 1711, 1674, 1578, 1407, 1211, 1177, 1000, 861, 700 cm<sup>-1</sup>; HRMS (DART) *m/z* Calcd for C<sub>15</sub>H<sub>17</sub>O (MH<sup>+</sup>): 213.12739; found: 213.12726; HPLC (Chiralcel OD-H; 0.3%/ 99.7% isopropanol/ hexanes, 0.5 mL/min; tr = 30.4 min (major), 32.2 min (minor); 97:3 er); [α]<sub>D</sub><sup>25</sup> = -1.5° (c = 1.0, CH<sub>2</sub>Cl<sub>2</sub>). The absolute configuration for this product was assigned in analogy to that determined for product **2a**.

Acq. Operator : SYSTEM                                               Seq. Line : 2  
Acq. Instrument : Wasa\_LC1                                            Location : 53  
Injection Date : 10/15/2018 6:05:25 PM                             Inj : 1  
                                                                          Inj Volume : 4.000 µl  
Acq. Method : C:\Chem32\1\Data\JOE 2018-10-15 17-02-32\column3 0.3% IPA 99.7% hex 60min-0  
                                                                          .Sml.M  
Last changed : 10/15/2018 5:02:35 PM by SYSTEM  
Analysis Method : C:\Chem32\1\Data\JOE 2018-10-15 17-02-32\column3 0.3% IPA 99.7% hex 60min-0  
                                                                          .Sml.M (Sequence Method)

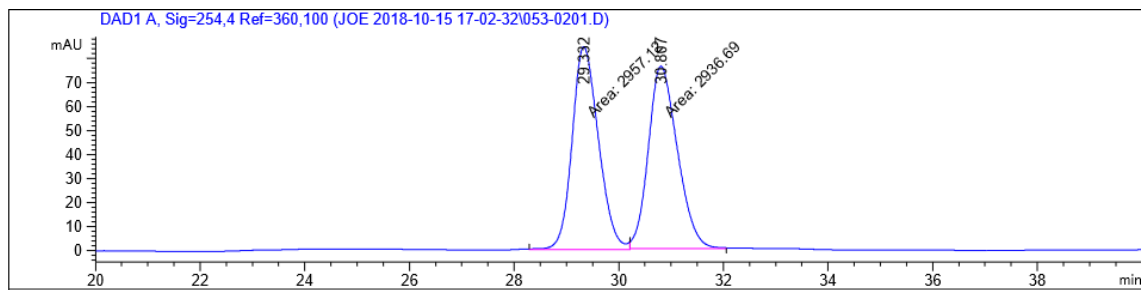

Signal 1: DAD1 A, Sig=254,4 Ref=360,100

| Peak # | RetTime [min] | Type | Width [min] | Area [mAU*s] | Height [mAU] | Area %  |
|--------|---------------|------|-------------|--------------|--------------|---------|
| 1      | 29.332        | MM   | 0.5842      | 2957.11914   | 84.36610     | 50.1733 |
| 2      | 30.807        | MM   | 0.6442      | 2936.69336   | 75.97674     | 49.8267 |

Totals :                                               5893.81250   160.34284

```

Acq. Operator   : SYSTEM                      Seq. Line :    2
Acq. Instrument : Wasa_LC1                   Location  :   62
Injection Date  : 10/15/2018 7:43:43 PM      Inj       :    1
                                          Inj Volume: 4.000 µl
Acq. Method     : C:\Chem32\1\Data\JOE 2018-10-15 19-01-41\column3 0.3% IPA 99.7% hex 40min-0
                                          .5ml.M
Last changed    : 10/15/2018 7:01:44 PM by SYSTEM
Analysis Method : C:\Chem32\1\Data\JOE 2018-10-15 19-01-41\column3 0.3% IPA 99.7% hex 40min-0
                                          .5ml.M (Sequence Method)
  
```

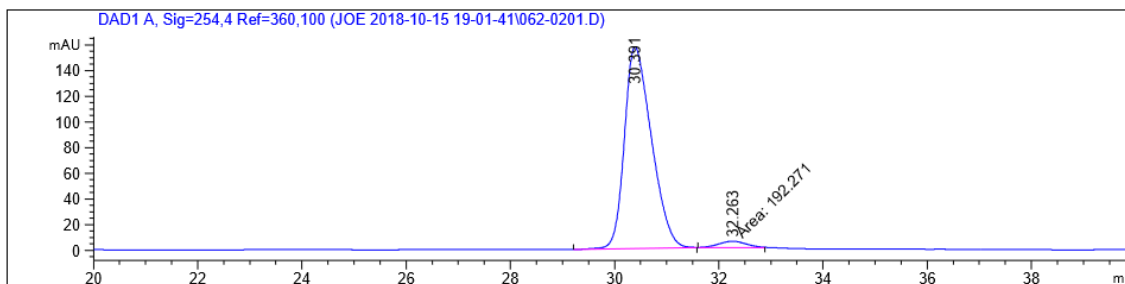

Signal 1: DAD1 A, Sig=254,4 Ref=360,100

| Peak # | RetTime [min] | Type | Width [min] | Area [mAU*s] | Height [mAU] | Area %  |
|--------|---------------|------|-------------|--------------|--------------|---------|
| 1      | 30.391        | BB   | 0.5504      | 5657.95703   | 157.00883    | 96.7134 |
| 2      | 32.263        | MM   | 0.6373      | 192.27145    | 5.02845      | 3.2866  |

Totals : 5850.22849 162.03728

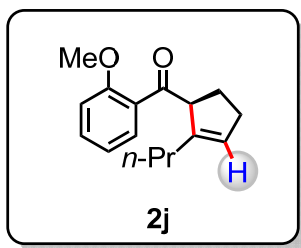

**(S)-(2-Methoxyphenyl)(2-propylcyclopent-2-en-1-yl)methanone (2j)**

According to the General Procedure C, 1-(2-methoxyphenyl)non-5-yn-1-one **1j** (48.9 mg, 0.2 mmol) was subjected to the Conia-ene-type reaction using PMP as the Brønsted base catalyst. The product was purified by silica gel column chromatography (1.0 % EtOAc in hexanes) to give **2j** (46.4 mg, 95%) as a colorless oil.  $^1\text{H NMR}$  (600 MHz,  $\text{CDCl}_3$ )  $\delta$  7.55 (d,  $J = 9.1$  Hz, 1H), 7.44 (t,  $J = 7.0$  Hz, 1H), 7.00 (t,  $J = 7.5$  Hz, 1H), 6.96 (d,  $J = 8.3$  Hz, 1H), 5.62 – 5.55 (m, 1H), 4.48 – 4.36 (m, 1H), 3.89 (s, 3H), 2.48 – 2.38 (m, 1H), 2.35 – 2.27 (m, 1H), 2.26 – 2.19 (m, 1H), 2.09 – 2.00 (m, 2H), 1.97 – 1.89 (m, 1H), 1.48 – 1.35 (m, 2H), 0.85 (t,  $J = 7.4$  Hz, 3H);  $^{13}\text{C NMR}$  (126 MHz,  $\text{CDCl}_3$ )  $\delta$  206.35, 158.03, 143.88, 132.81, 129.91, 129.87, 127.03, 120.67, 111.44, 59.09, 55.48, 32.16, 31.37, 29.38, 20.84, 14.02; **IR** (neat) 2954, 2928, 2867, 2847, 1671, 1595, 1483, 1462, 1435, 1281, 1243, 1021, 999, 754  $\text{cm}^{-1}$ ; **HRMS** (DART)  $m/z$  Calcd for  $\text{C}_{16}\text{H}_{21}\text{O}_2$  ( $\text{MH}^+$ ): 245.15361; found: 245.15409; **HPLC** (Chiralcel OD-H; 1%/99% isopropanol/ hexanes, 0.5 mL/min;  $t_r = 14.6$  min (major), 16.4 min (minor); 93:7 er);  $[\alpha]_D^{25} = -45.0^\circ$  ( $c = 1.0$ ,  $\text{CH}_2\text{Cl}_2$ ). The absolute configuration for this product was assigned in analogy to that determined for product **2a**.





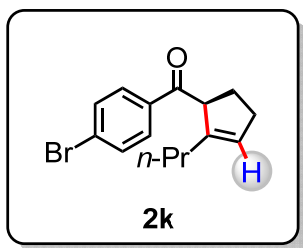

**(S)-(4-Bromophenyl)(2-propylcyclopent-2-en-1-yl)methanone (2k)**

According to the General Procedure C, 1-(2-methoxyphenyl)non-5-yn-1-one **1k** (58.6 mg, 0.2 mmol) was subjected to the Conia-ene-type reaction using PMP as the Brønsted base catalyst. The product was purified by silica gel column chromatography (1.0 % EtOAc in hexanes) to give **2j** (56.8 mg, 97%) as a colorless oil. **<sup>1</sup>H NMR** (500 MHz, CDCl<sub>3</sub>) δ 7.86 (d, *J* = 8.6 Hz, 2H), 7.61 (d, *J* = 8.7 Hz, 2H), 5.67 – 5.59 (m, 1H), 4.41 – 4.25 (m, 1H), 2.53 – 2.45 (m, 1H), 2.43 – 2.26 (m, 2H), 2.09 – 1.98 (m, 2H), 1.97 – 1.87 (m, 1H), 1.51 – 1.35 (m, 2H), 0.86 (t, *J* = 7.3 Hz, 3H); **<sup>13</sup>C NMR** (126 MHz, CDCl<sub>3</sub>) δ 201.52, 142.93, 135.83, 131.89, 130.03, 128.08, 127.52, 55.00, 32.10, 31.64, 29.55, 20.87, 13.96; **IR** (neat) 2956, 2928, 2869, 1706, 1675, 1581, 1208, 1102, 1068, 839, 756 cm<sup>-1</sup>; **HRMS** (DART) *m/z* Calcd for C<sub>15</sub>H<sub>18</sub>OBr (MH<sup>+</sup>): 293.05355; found: 293.05226; **HPLC** (Chiralcel OD-H; 1%/ 99% isopropanol/ hexanes, 0.5 mL/min; tr = 8.7 min (major), 9.4 min (minor); 97:3 er); [α]<sub>D</sub><sup>25</sup> = -27.2° (c = 1.0, CH<sub>2</sub>Cl<sub>2</sub>). The absolute configuration for this product was assigned in analogy to that determined for product **2a**.

Acq. Operator : SYSTEM  
 Acq. Instrument : Wasa\_LC1  
 Injection Date : 10/26/2018 6:39:50 PM  
 Method : C:\Chem32\1\Data\JOE 2018-10-26 18-07-00\column3 1% IPA 99% hex 30min-0.5ml.M (Sequence Method)  
 Last changed : 10/26/2018 6:07:03 PM by SYSTEM

Seq. Line : 2  
 Location : 36  
 Inj : 1  
 Inj Volume : 4.000 µl

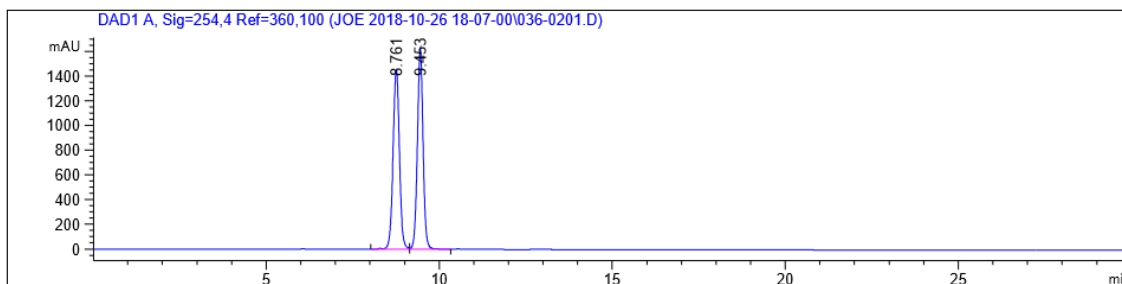

Signal 1: DAD1 A, Sig=254,4 Ref=360,100

| Peak # | RetTime [min] | Type | Width [min] | Area [mAU*s] | Height [mAU] | Area %  |
|--------|---------------|------|-------------|--------------|--------------|---------|
| 1      | 8.761         | VV R | 0.1948      | 1.86652e4    | 1457.95239   | 49.8964 |
| 2      | 9.453         | VB   | 0.1758      | 1.87427e4    | 1634.13538   | 50.1036 |

Totals : 3.74079e4 3092.08777



Acq. Operator : SYSTEM  
Acq. Instrument : Wasa LC1  
Injection Date : 10/26/2018 9:09:24 PM  
Method : C:\Chem32\1\Data\JOE 2018-10-26 20-05-39\column3 1% IPA 99% hex 30min-0.5ml.M (Sequence Method)  
Last changed : 10/26/2018 8:05:41 PM by SYSTEM

Seq. Line : 3  
Location : 37  
Inj : 1  
Inj Volume : 4.000 µl

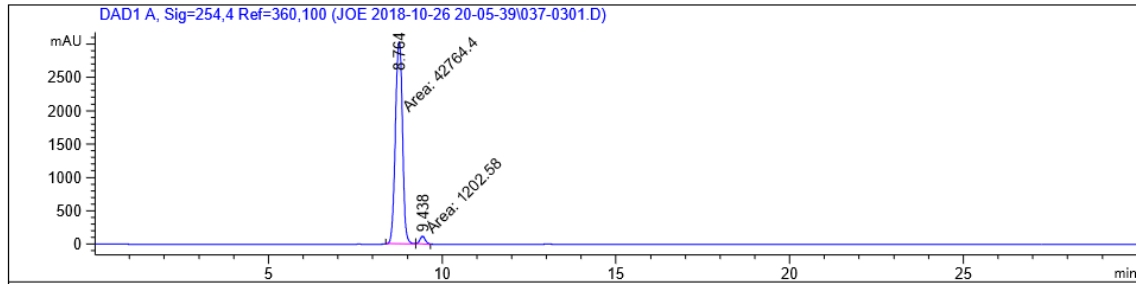

Signal 1: DAD1 A, Sig=254,4 Ref=360,100

| Peak # | RetTime [min] | Type | Width [min] | Area [mAU*s] | Height [mAU] | Area %  |
|--------|---------------|------|-------------|--------------|--------------|---------|
| 1      | 8.764         | MM   | 0.2357      | 4.27644e4    | 3023.44922   | 97.2648 |
| 2      | 9.438         | MM   | 0.1751      | 1202.58374   | 114.45716    | 2.7352  |

Totals : 4.39669e4 3137.90638

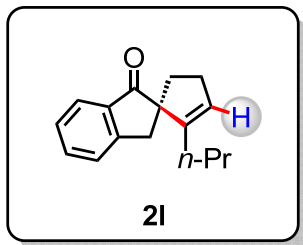

**(R)-2-Propylspiro[cyclopentane-1,2'-inden]-2-en-1'(3'H)-one (2I)**

According to the General Procedure C, 2-(hept-3-yn-1-yl)-2,3-dihydro-1*H*-inden-1-one **1I** (45.3 mg, 0.2 mmol) was subjected to the Conia-ene-type reaction using *N*-methylpiperidine as the Brønsted base catalyst. The product was purified by silica gel column chromatography (1.0 % EtOAc in hexanes) to give **2I** (44.4 mg, 98%) as a pale yellow oil. **<sup>1</sup>H NMR** (600 MHz, CDCl<sub>3</sub>) δ 7.77 (d, *J* = 7.7 Hz, 1H), 7.60 (t, *J* = 7.4 Hz, 1H), 7.45 (d, *J* = 7.6 Hz, 1H), 7.38 (t, *J* = 7.4 Hz, 1H), 5.70 – 5.63 (m, 1H), 3.24 (d, *J* = 17.4 Hz, 1H), 3.08 (d, *J* = 17.4 Hz, 1H), 2.58 – 2.50 (m, 1H), 2.50 – 2.35 (m, 2H), 1.95 – 1.85 (m, 1H), 1.73 – 1.64 (m, 2H), 1.51 – 1.32 (m, 2H), 0.82 (t, *J* = 7.3 Hz, 3H); **<sup>13</sup>C NMR** (151 MHz, CDCl<sub>3</sub>) δ 213.24, 155.99, 148.63, 139.37, 137.47, 130.05, 129.49, 129.00, 126.73, 67.30, 42.38, 40.60, 33.51, 32.29, 23.50, 16.72; **IR** (neat) 2953, 2926, 2868, 2847, 1704, 1604, 1462, 1275, 909, 780, 729 cm<sup>-1</sup>; **HRMS** (DART) *m/z* Calcd for C<sub>16</sub>H<sub>19</sub>O (MH<sup>+</sup>): 227.1430; found: 227.1429; **HPLC** (Chiralcel OD-H; 1%/ 99% isopropanol/ hexanes, 0.5 mL/min; tr = 10.7 min (minor), 11.5 min (major); 99:1 er); [α]<sub>D</sub><sup>25</sup> = -131.7° (c = 1.0, CH<sub>2</sub>Cl<sub>2</sub>). The absolute configuration for this product was assigned in analogy to that determined for product **2a**.

Acq. Operator : SYSTEM Seq. Line : 1  
 Acq. Instrument : Wasa\_LC1 Location : 4  
 Injection Date : 10/30/2018 9:18:10 PM Inj : 1  
Inj Volume : 4.000 µl  
 Method : C:\Chem32\1\Data\JOE 2018-10-30 21-16-16\column4 1%IPA 99% hexane 30min-0.5mL.M (Sequence Method)  
 Last changed : 10/30/2018 9:16:19 PM by SYSTEM  
 Method Info : Column4 30min-1% iPrOH 99% hexane-0.5mL

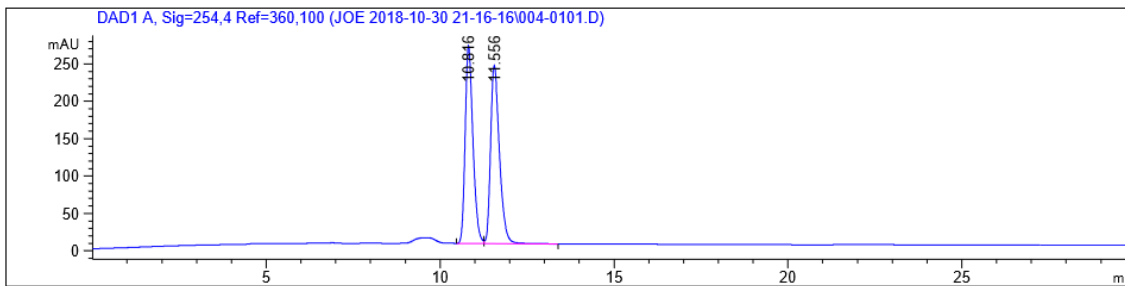

Signal 1: DAD1 A, Sig=254,4 Ref=360,100

| Peak # | RetTime [min] | Type | Width [min] | Area [mAU*s] | Height [mAU] | Area %  |
|--------|---------------|------|-------------|--------------|--------------|---------|
| 1      | 10.816        | BV   | 0.2395      | 4120.73535   | 264.92889    | 49.4271 |
| 2      | 11.556        | VB   | 0.2704      | 4216.26660   | 238.31940    | 50.5729 |

Totals : 8337.00195 503.24829



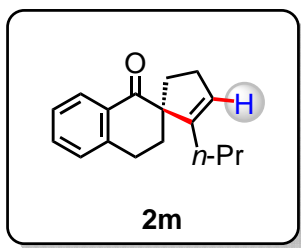

**(R)-2-Propyl-3',4'-dihydro-1'H-spiro[cyclopentane-1,2'-naphthalen]-2-en-1'-one (2m)**

According to the General Procedure **D**, 2-(hept-3-yn-1-yl)-3,4-dihydronaphthalen-1(2*H*)-one **1m** (48.1 mg, 0.2 mmol) was subjected to the Conia-ene-type reaction using *N*-methylpiperidine as the Brønsted base catalyst. The product was purified by silica gel column chromatography (1.0 % EtOAc in hexanes) to give **2m** (9.6 mg, 20%) as a pale yellow oil. **<sup>1</sup>H NMR** (600 MHz, CDCl<sub>3</sub>) δ 8.06 (d, *J* = 7.8 Hz, 1H), 7.46 (t, *J* = 7.4 Hz, 1H), 7.30 (t, *J* = 7.5 Hz, 1H), 7.23 (d, *J* = 7.6 Hz, 1H), 5.65 (s, 1H), 3.24 – 3.08 (m, 1H), 2.98 – 2.86 (m, 1H), 2.45 – 2.36 (m, 1H), 2.35 (dd, *J* = 4.4, 2.4 Hz, 2H), 2.05 (t, *J* = 6.9 Hz, 2H), 1.96 – 1.81 (m, 3H), 1.61 – 1.45 (m, 2H), 0.92 (t, *J* = 7.3 Hz, 3H); **<sup>13</sup>C NMR** (151 MHz, CDCl<sub>3</sub>) δ 203.22, 149.39, 146.32, 135.73, 134.68, 131.15, 130.64, 129.28, 128.58, 64.11, 36.59, 35.00, 32.80, 32.37, 29.02, 23.72, 16.92; **IR** (neat) 2952, 2924, 2867, 2848, 1674, 1597, 1431, 1215, 904, 831, 789 cm<sup>-1</sup>; HRMS (DART) *m/z* Calcd for C<sub>17</sub>H<sub>21</sub>O (MH<sup>+</sup>): 241.15869; found: 241.15884; **HPLC** (Chiralcel OD-H; 1%/ 99% isopropanol/ hexanes, 0.5 mL/min; tr = 10.0 min (major), 15.7 min (minor); 98:2 er); [α]<sub>D</sub><sup>25</sup> = -12.3° (c = 1.0, CH<sub>2</sub>Cl<sub>2</sub>). The absolute configuration for this product was assigned in analogy to that determined for product **2a**.

```

Acq. Operator   : SYSTEM                               Seq. Line :    8
Acq. Instrument : Wasa_LC1                             Location  :   83
Injection Date  : 11/24/2018 5:04:10 AM                Inj       :    1
                                                    Inj Volume: 4.000 µl
Method          : C:\Chem32\1\Data\JOE 2018-11-23 22-36-22\column3 1% IPA 99% hex 30min-0.5ml
                                                    .M (Sequence Method)
Last changed    : 11/23/2018 10:36:26 PM by SYSTEM

```

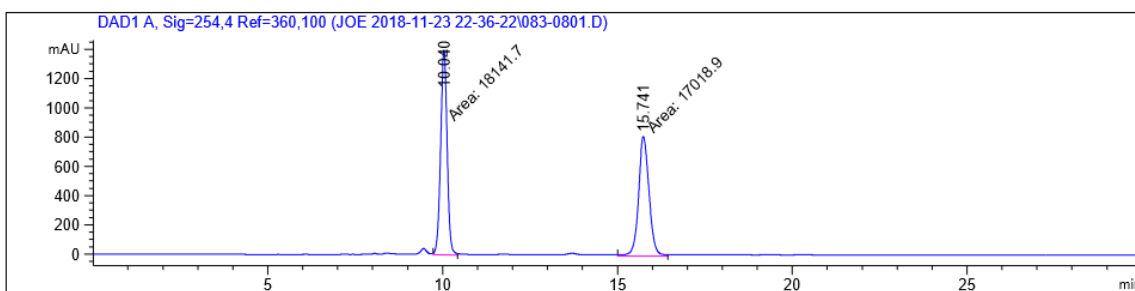

Signal 1: DAD1 A, Sig=254,4 Ref=360,100

| Peak # | RetTime [min] | Type | Width [min] | Area [mAU*s] | Height [mAU] | Area %  |
|--------|---------------|------|-------------|--------------|--------------|---------|
| 1      | 10.040        | MM   | 0.2158      | 1.81417e4    | 1400.84106   | 51.5967 |
| 2      | 15.741        | MM   | 0.3471      | 1.70189e4    | 817.21051    | 48.4033 |

Totals : 3.51607e4 2218.05157

Acq. Operator : SYSTEM  
 Acq. Instrument : Wasa\_LC1  
 Injection Date : 11/24/2018 5:35:06 AM  
 Method : C:\Chem32\1\Data\JOE 2018-11-23 22-36-22\column3 1% IPA 99% hex 30min-0.5ml.M (Sequence Method)  
 Last changed : 11/23/2018 10:36:26 PM by SYSTEM  
 Additional Info : Peak(s) manually integrated

Seq. Line : 9  
 Location : 84  
 Inj : 1  
 Inj Volume : 4.000 µl

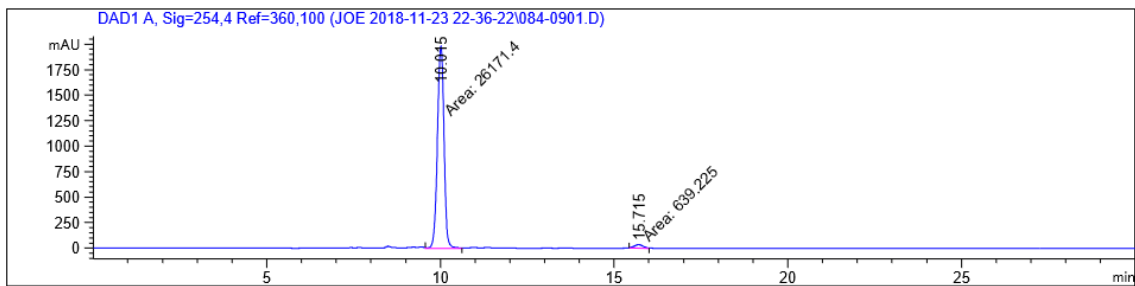

Signal 1: DAD1 A, Sig=254,4 Ref=360,100

| Peak # | RetTime [min] | Type | Width [min] | Area [mAU*s] | Height [mAU] | Area %  |
|--------|---------------|------|-------------|--------------|--------------|---------|
| 1      | 10.015        | MM   | 0.2197      | 2.61714e4    | 1985.49268   | 97.6158 |
| 2      | 15.715        | MM   | 0.3074      | 639.22522    | 34.66180     | 2.3842  |

Totals : 2.68107e4 2020.15448

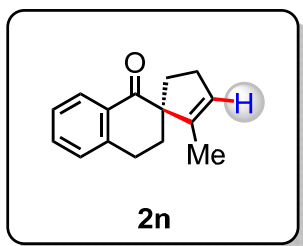

**(R)-2-Methyl-3',4'-dihydro-1'H-spiro[cyclopentane-1,2'-naphthalen]-2-en-1'-one**

According to the General Procedure **D**, 2-(pent-3-yn-1-yl)-3,4-dihydronaphthalen-1(2*H*)-one **1n** (42.5 mg, 0.2 mmol) was subjected to the Conia-ene-type reaction using *N*-methylpiperidine as the Brønsted base catalyst. The product was purified by silica gel column chromatography (1.0 % EtOAc in hexanes) to give **2n** (31.0 mg, 73%) as a pale yellow oil.  $^1\text{H NMR}$  (600 MHz,  $\text{CDCl}_3$ )  $\delta$  8.05 (d,  $J = 7.8$  Hz, 1H), 7.45 (t,  $J = 7.4$  Hz, 1H), 7.29 (t,  $J = 7.5$  Hz, 1H), 7.23 (d,  $J = 7.6$  Hz, 1H), 5.65 – 5.60 (m, 1H), 3.19 – 3.09 (m, 1H), 2.96 – 2.87 (m, 1H), 2.40 – 2.34 (m, 1H), 2.34 – 2.29 (m, 1H), 2.11 – 1.99 (m, 2H), 1.91 – 1.80 (m, 1H), 1.65 (s, 3H);  $^{13}\text{C NMR}$  (151 MHz,  $\text{CDCl}_3$ )  $\delta$  203.14, 146.36, 144.77, 135.78, 134.64, 131.19, 130.64, 130.56, 129.27, 63.82, 36.31, 34.72, 32.34, 28.96, 16.11; **IR** (neat) 2848, 2765, 1674, 1597, 1375, 1216, 1021, 900, 830, 738, 486  $\text{cm}^{-1}$ ; HRMS (DART) Calcd for  $\text{C}_{15}\text{H}_{15}\text{O}$  ( $\text{MH}^+$ ): 213.12739; found: 213.12669; **HPLC** (Chiralcel OD-H; 1%/ 99% isopropanol/ hexanes, 0.5 mL/min; tr = 14.0 min (major), 18.7 min (minor); 91:9 er);  $[\alpha]_{\text{D}}^{25} = -21.1^\circ$  (c = 1.0,  $\text{CH}_2\text{Cl}_2$ ). The absolute configuration for this product was assigned in analogy to that determined for product **2a**.



```

Acq. Operator   : SYSTEM                               Seq. Line :    8
Acq. Instrument : Wasa_LC1                             Location  :   16
Injection Date  : 11/20/2018 11:18:28 PM              Inj       :    1
                                                    Inj Volume: 4.000 µl
Method          : C:\Chem32\1\Data\JOE 2018-11-20 18-49-49\column3 1% IPA 99% hex 30min-0.5ml
                .M (Sequence Method)
Last changed    : 11/20/2018 6:49:53 PM by SYSTEM
  
```

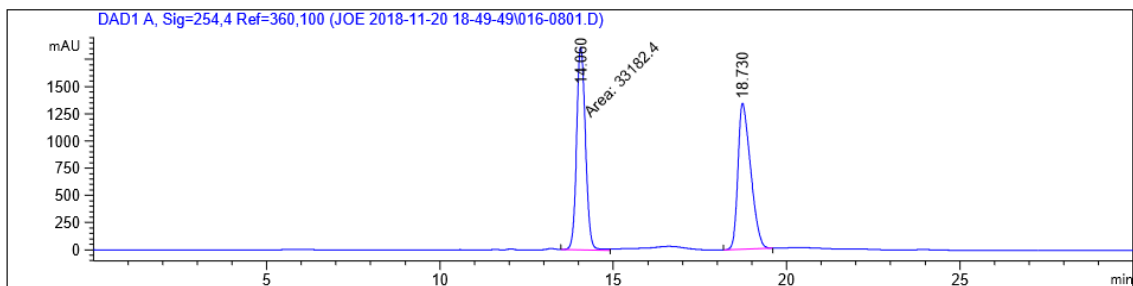

Signal 1: DAD1 A, Sig=254,4 Ref=360,100

| Peak # | RetTime [min] | Type | Width [min] | Area [mAU*s] | Height [mAU] | Area %  |
|--------|---------------|------|-------------|--------------|--------------|---------|
| 1      | 14.060        | MM   | 0.2969      | 3.31824e4    | 1862.94519   | 49.2553 |
| 2      | 18.730        | BB   | 0.3908      | 3.41858e4    | 1343.65039   | 50.7447 |

Totals : 6.73682e4 3206.59558

```

Acq. Operator   : SYSTEM                      Seq. Line :    9
Acq. Instrument : Wasa_LC1                    Location  :   17
Injection Date  : 11/20/2018 11:49:25 PM     Inj       :    1
                                          Inj Volume: 4.000 µl
Method          : C:\Chem32\1\Data\JOE 2018-11-20 18-49-49\column3 1% IPA 99% hex 30min-0.5ml
                  .M (Sequence Method)
Last changed    : 11/20/2018 6:49:53 PM by SYSTEM

```

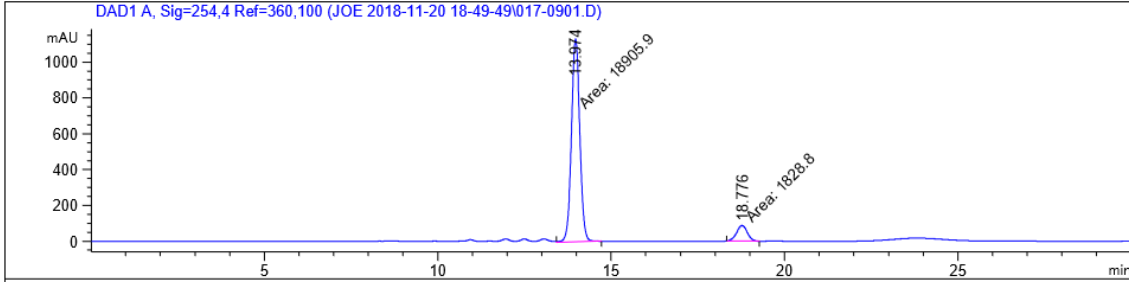

Signal 1: DAD1 A, Sig=254,4 Ref=360,100

| Peak # | RetTime [min] | Type | Width [min] | Area [mAU*s] | Height [mAU] | Area %  |
|--------|---------------|------|-------------|--------------|--------------|---------|
| 1      | 13.974        | MM   | 0.2783      | 1.89059e4    | 1132.41357   | 91.1800 |
| 2      | 18.776        | MM   | 0.3532      | 1828.79651   | 86.29856     | 8.8200  |

Totals :                    2.07347e4  1218.71214

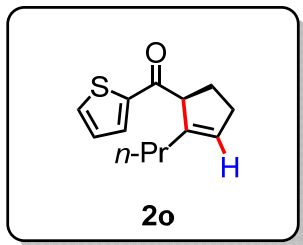

**(S)-(2-Propylcyclopent-2-en-1-yl)(thiophen-2-yl)methanone (2o)**

According to the General Procedure C, 1-(thiophen-2-yl)non-5-yn-1-one **1o** (44.1 mg, 0.2 mmol) was subjected to the Conia-ene-type reaction using PMP as the Brønsted base catalyst. The product was purified by silica gel column chromatography (1.0 % EtOAc in hexanes) to give **2o** (43.7 mg, 99%) as a colorless oil. **<sup>1</sup>H NMR** (500 MHz, CDCl<sub>3</sub>) δ 7.78 (dd, *J* = 3.8, 1.1 Hz, 1H), 7.64 (dd, *J* = 4.9, 1.1 Hz, 1H), 7.14 (dd, *J* = 4.9, 3.8 Hz, 1H), 5.64 (d, *J* = 1.6 Hz, 1H), 4.24 (t, *J* = 6.8 Hz, 1H), 2.58 – 2.47 (m, 1H), 2.45 – 2.36 (m, 1H), 2.36 – 2.27 (m, 1H), 2.18 – 2.09 (m, 1H), 2.09 – 2.00 (m, 1H), 2.00 – 1.91 (m, 1H), 1.54 – 1.36 (m, 2H), 0.86 (t, *J* = 7.3 Hz, 3H); **<sup>13</sup>C NMR** (126 MHz, CDCl<sub>3</sub>) δ 195.69, 144.56, 143.01, 133.68, 131.99, 128.11, 127.68, 56.75, 32.04, 31.79, 29.77, 20.87, 13.96; **IR** (neat) 2953, 2926, 2866, 1652, 1410, 1231, 1207, 1060, 892, 860, 720 cm<sup>-1</sup>; **HRMS** (DART) *m/z* Calcd for C<sub>13</sub>H<sub>17</sub>OS (MH<sup>+</sup>): 221.0995; found: 221.0998; **HPLC** (Chiralcel OD-H; 1%/ 99% isopropanol/ hexanes, 0.5 mL/min; tr = 12.8 min (major), 14.8 min (minor); 98:2 er); [α]<sub>D</sub><sup>25</sup> = -89.5° (c = 1.0, CH<sub>2</sub>Cl<sub>2</sub>). The absolute configuration for this product was assigned in analogy to that determined for product **2a**.

Acq. Operator : SYSTEM  
Acq. Instrument : Wasa\_LC1  
Injection Date : 10/26/2018 6:08:53 PM  
Seq. Line : 1  
Location : 33  
Inj : 1  
Inj Volume : 4.000 µl  
Acq. Method : C:\Chem32\1\Data\JOE 2018-10-26 18-07-00\column3 1% IPA 99% hex 30min-0.5ml.M  
Last changed : 10/26/2018 6:07:03 PM by SYSTEM  
Analysis Method : C:\Chem32\1\Data\JOE 2018-10-26 18-07-00\column3 1% IPA 99% hex 30min-0.5ml.M (Sequence Method)

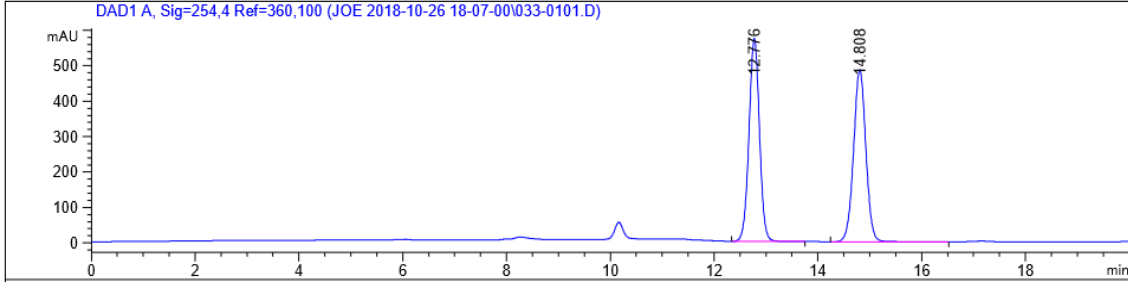

Signal 1: DAD1 A, Sig=254,4 Ref=360,100

| Peak # | RetTime [min] | Type | Width [min] | Area [mAU*s] | Height [mAU] | Area %  |
|--------|---------------|------|-------------|--------------|--------------|---------|
| 1      | 12.776        | BB   | 0.2154      | 8034.31201   | 573.58746    | 50.0399 |
| 2      | 14.808        | BB   | 0.2545      | 8021.49268   | 486.06281    | 49.9601 |

Totals : 1.60558e4 1059.65027



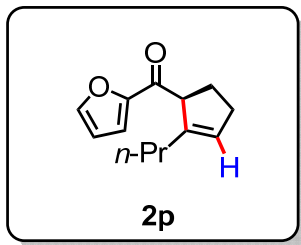

**(S)-Furan-2-yl(2-propylcyclopent-2-en-1-yl)methanone (2p)**

According to the General Procedure C, 1-(furan-2-yl)non-5-yn-1-one **1p** (40.9 mg, 0.2 mmol) was subjected to the Conia-ene-type reaction using PMP as the Brønsted base catalyst. The product was purified by silica gel column chromatography (1.0 % EtOAc in hexanes) to give **2p** (40.5 mg, 99%) as a colorless oil. **<sup>1</sup>H NMR** (500 MHz, CDCl<sub>3</sub>) δ 7.61 (dd, *J* = 1.7, 0.8 Hz, 1H), 7.23 (dd, *J* = 3.5, 0.8 Hz, 1H), 6.55 (dd, *J* = 3.6, 1.7 Hz, 1H), 5.63 (d, *J* = 1.7 Hz, 1H), 4.26 – 4.18 (m, 1H), 2.57 – 2.46 (m, 1H), 2.43 – 2.34 (m, 1H), 2.33 – 2.22 (m, 1H), 2.16 – 2.07 (m, 1H), 2.07 – 1.98 (m, 1H), 1.98 – 1.88 (m, 1H), 1.53 – 1.35 (m, 2H), 0.86 (t, *J* = 7.3 Hz, 3H); **<sup>13</sup>C NMR** (126 MHz, CDCl<sub>3</sub>) δ 191.79, 152.78, 146.52, 142.82, 127.68, 117.54, 112.16, 55.47, 31.98, 31.72, 29.18, 20.83, 13.93; **IR** (neat) 2955, 2928, 1662, 1564, 1462, 1390, 1289, 1013, 811, 918, 593 cm<sup>-1</sup>; **HRMS** (DART) *m/z* Calcd for C<sub>13</sub>H<sub>17</sub>O<sub>2</sub> (MH<sup>+</sup>): 205.1223; found: 205.1218; **HPLC** (Chiralcel OD-H; 1%/ 99% isopropanol/ hexanes, 0.5 mL/min; tr = 12.3 min (major), 15.7 min (minor); 97:3 er); [α]<sub>D</sub><sup>25</sup> = -103.8° (c = 1.0, CH<sub>2</sub>Cl<sub>2</sub>). The absolute configuration for this product was assigned in analogy to that determined for product **2a**.







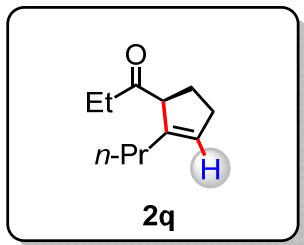

**(S)-1-(2-Propylcyclopent-2-en-1-yl)propan-1-one (2q)**

According to the General Procedure C, undec-7-yn-3-one **1q** (33.2 mg, 0.2 mmol) was subjected to the Conia-ene-type reaction using PMP as the Brønsted base catalyst. The product was purified by silica gel column chromatography (1.0 % Et<sub>2</sub>O in pentane) to give **2q** (30.2 mg, 91%) as a colorless oil. <sup>1</sup>H NMR (500 MHz, CDCl<sub>3</sub>) δ 5.58 (s, 1H), 3.51 (t, *J* = 9.0 Hz, 1H), 2.45 (q, *J* = 7.1 Hz, 3H), 2.41 – 2.30 (m, 1H), 2.20 – 2.10 (m, 1H), 2.04 – 1.87 (m, 3H), 1.54 – 1.36 (m, 2H), 1.05 (t, *J* = 7.3 Hz, 3H), 0.89 (t, *J* = 7.3 Hz, 3H); <sup>13</sup>C NMR (151 MHz, CDCl<sub>3</sub>) δ 216.66, 145.66, 130.17, 63.15, 36.08, 34.70, 34.43, 30.72, 23.45, 16.61, 10.52; IR (neat) 2955, 2924, 2869, 2850, 1704, 1457, 1376, 1181, 1111, 798 cm<sup>-1</sup>; HRMS (DART) *m/z* Calcd for C<sub>11</sub>H<sub>19</sub>O (MH<sup>+</sup>): 167.14304; found: 167.14224; HPLC (Chiralcel OD-H; 0.3%/ 99.7% isopropanol/ hexanes, 0.5 mL/min; *t<sub>r</sub>* = 13.9 min (major), 14.7 min (minor); 95:5 er); [α]<sub>D</sub><sup>25</sup> = -189.3° (*c* = 1.0, CH<sub>2</sub>Cl<sub>2</sub>). The absolute configuration for this product was assigned in analogy to that determined for product **2a**.



```

Acq. Operator   : SYSTEM                      Seq. Line :    2
Acq. Instrument : Wasa_LC1                   Location  :    8
Injection Date  : 11/20/2018 5:19:50 PM     Inj       :    1
                                          Inj Volume: 4.000 µl
Method          : C:\Chem32\1\Data\JOE 2018-11-20 16-47-45\column3 0.3% IPA 99.7% hex 30min-0
                  .5ml.M (Sequence Method)
Last changed    : 11/20/2018 4:47:48 PM by SYSTEM

```

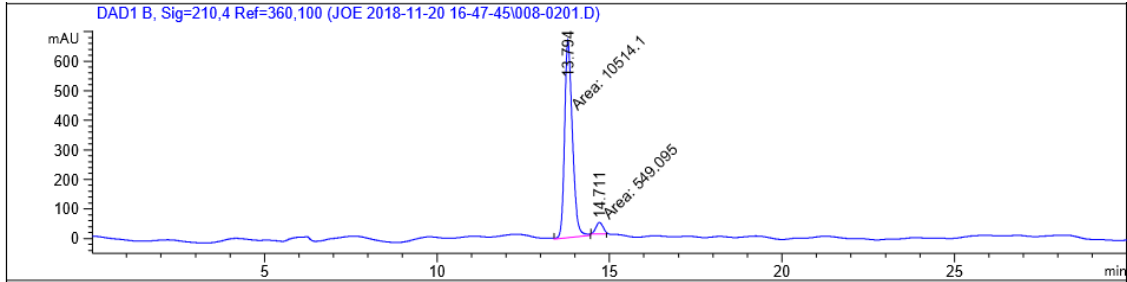

Signal 2: DAD1 B, Sig=210,4 Ref=360,100

| Peak #   | RetTime [min] | Type | Width [min] | Area [mAU*s] | Height [mAU] | Area %  |
|----------|---------------|------|-------------|--------------|--------------|---------|
| 1        | 13.794        | MM   | 0.2625      | 1.05141e4    | 667.44690    | 95.0367 |
| 2        | 14.711        | MM   | 0.2392      | 549.09467    | 38.26130     | 4.9633  |
| Totals : |               |      |             | 1.10632e4    | 705.70820    |         |

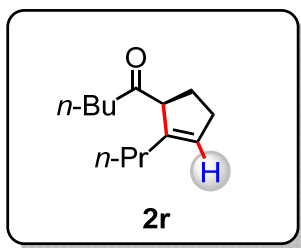

**(S)-1-(2-Propylcyclopent-2-en-1-yl)pentan-1-one (2r)**

According to the General Procedure C, tridec-9-yn-5-one **1r** (38.9 mg, 0.2 mmol) was subjected to the Conia-ene-type reaction using PMP as the Brønsted base catalyst. The product was purified by silica gel column chromatography (1.0 % Et<sub>2</sub>O in pentane) to give **2r** (30.3 mg, 78%) as a colorless oil. <sup>1</sup>H NMR (600 MHz, CDCl<sub>3</sub>) δ 5.61 – 5.55 (m, 1H), 3.49 (d, *J* = 5.8 Hz, 1H), 2.51 – 2.40 (m, 3H), 2.40 – 2.32 (m, 1H), 2.19 – 2.09 (m, 1H), 2.04 – 1.87 (m, 3H), 1.58 – 1.52 (m, 2H), 1.52 – 1.37 (m, 2H), 1.30 (h, *J* = 7.4 Hz, 2H), 0.95 – 0.84 (m, 6H); <sup>13</sup>C NMR (151 MHz, CDCl<sub>3</sub>) δ 216.22, 145.64, 130.19, 63.33, 42.69, 34.69, 34.43, 30.61, 28.47, 25.06, 23.45, 16.61, 16.54; IR (neat) 2954, 2928, 2869, 1703, 1461, 1405, 1377, 1125, 1060 cm<sup>-1</sup>; HRMS (DART) *m/z* Calcd for C<sub>13</sub>H<sub>23</sub>O (MH<sup>+</sup>): 195.17434; found: 195.17326; HPLC (Chiralcel OD-H; 0.3%/ 99.7% isopropanol/ hexanes, 0.5 mL/min; tr = 14.4 min (major), 16.1 min (minor); 96:4 er); [α]<sub>D</sub><sup>25</sup> = -136.9° (c = 1.0, CH<sub>2</sub>Cl<sub>2</sub>). The absolute configuration for this product was assigned in analogy to that determined for product **2a**.

Acq. Operator : SYSTEM  
 Acq. Instrument : Wasa\_LC1  
 Injection Date : 12/1/2018 10:26:02 PM  
 Method : C:\Chem32\1\Data\JOE 2018-12-01 19-21-25\column3 0.3% IPA 99.7% hex 60min-0.5ml.M (Sequence Method)  
 Last changed : 12/1/2018 7:21:28 PM by SYSTEM

Seq. Line : 4  
 Location : 81  
 Inj : 1  
 Inj Volume : 4.000 µl

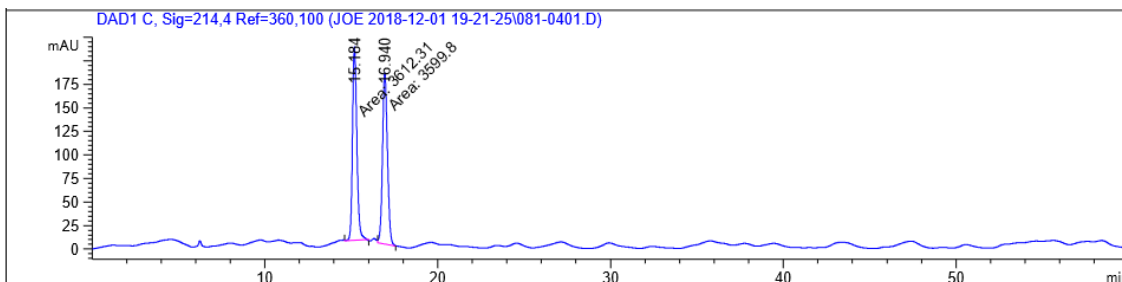

Signal 3: DAD1 C, Sig=214,4 Ref=360,100

| Peak # | RetTime [min] | Type | Width [min] | Area [mAU*s] | Height [mAU] | Area %  |
|--------|---------------|------|-------------|--------------|--------------|---------|
| 1      | 15.184        | MM   | 0.2931      | 3612.30859   | 205.42609    | 50.0867 |
| 2      | 16.940        | MM   | 0.3289      | 3599.79712   | 182.43704    | 49.9133 |

Totals : 7212.10571 387.86313



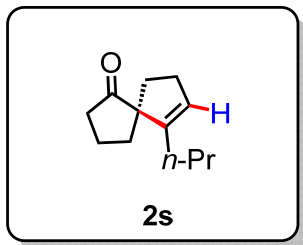

**(S)-6-Propylspiro[4.4]non-6-en-1-one (2s)**

According to the General Procedure C, 2-(hept-3-yn-1-yl)cyclopentan-1-one **1s** (35.7 mg, 0.2 mmol) was subjected to the Conia-ene-type reaction using *N*-methylpiperidine as the Brønsted base catalyst. The product was purified by silica gel column chromatography (1.0 % Et<sub>2</sub>O in pentane) to give **2s** (28.4 mg, 82%) as a colorless oil. **<sup>1</sup>H NMR** (500 MHz, CDCl<sub>3</sub>) δ 5.65 – 5.59 (m, 1H), 2.45 – 2.26 (m, 3H), 2.23 – 2.10 (m, 1H), 2.10 – 2.00 (m, 3H), 1.91 – 1.78 (m, 4H), 1.78 – 1.71 (m, 1H), 1.58 – 1.38 (m, 2H), 0.91 (t, *J* = 7.3 Hz, 3H); **<sup>13</sup>C NMR** (126 MHz, CDCl<sub>3</sub>) δ 222.72, 145.09, 126.90, 64.61, 38.05, 36.91, 34.51, 30.14, 20.93, 20.06, 14.15; **IR** (neat) 2953, 2924, 2867, 1730, 1449, 1121, 1092, 959, 890, 817, 790 cm<sup>-1</sup>; **HRMS** (DART) *m/z* Calcd for C<sub>12</sub>H<sub>19</sub>O (MH<sup>+</sup>): 179.14304; found: 179.14233; HPLC (Chiralcel OJ-H; 0.5%/ 99.5% isopropanol/ hexanes, 0.5 mL/min; tr = 9.2 min (major), 9.7 min (minor); 80:20 er); [α]<sub>D</sub><sup>25</sup> = -42.5° (c = 1.0, CH<sub>2</sub>Cl<sub>2</sub>). The absolute configuration for this product was assigned in analogy to that determined for product **2a**.





Acq. Operator : SYSTEM Seq. Line : 3  
 Acq. Instrument : Wasa\_LC1 Location : 82  
 Injection Date : 11/8/2018 4:15:05 PM Inj : 1  
Inj Volume : 4.000 µl  
 Method : C:\Chem32\1\Data\JOE 2018-11-08 15-32-10\column4 0.5%IPA 99.5% hexane 20min  
 -0.5mL.M (Sequence Method)  
 Last changed : 11/8/2018 3:32:13 PM by SYSTEM  
 Method Info : Column4 20min-0.5% iPROH 99.5% hexane-0.5mL

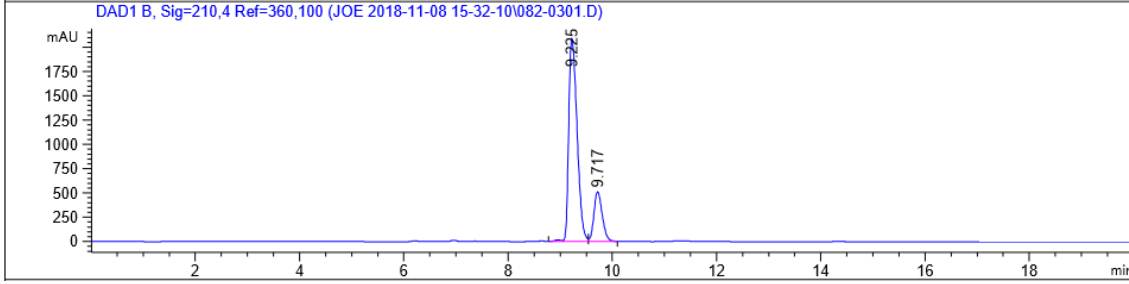

Signal 2: DAD1 B, Sig=210,4 Ref=360,100

| Peak # | RetTime [min] | Type | Width [min] | Area [mAU*s] | Height [mAU] | Area %  |
|--------|---------------|------|-------------|--------------|--------------|---------|
| 1      | 9.225         | VV R | 0.1751      | 2.32191e4    | 2087.54468   | 80.4174 |
| 2      | 9.717         | VB   | 0.1734      | 5654.11865   | 509.70819    | 19.5826 |

Totals : 2.88732e4 2597.25287

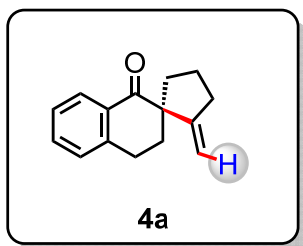

**(R)-2-Methylene-3',4'-dihydro-1'H-spiro[cyclopentane-1,2'-naphthalen]-1'-one (4a)**

According to the General Procedure C, 2-(pent-4-yn-1-yl)-3,4-dihydronaphthalen-1(2H)-one<sup>13</sup> **3a** (42.5 mg, 0.2 mmol) was subjected to the Conia-ene-type reaction using *N*-methylpiperidine as the Brønsted base catalyst. The product was purified by silica gel column chromatography (1.0 % EtOAc in hexanes) to give **4a** (41.6 mg, 98%) as a pale yellow oil. <sup>1</sup>H NMR (600 MHz, CDCl<sub>3</sub>) δ 8.04 (d, *J* = 7.8 Hz, 1H), 7.44 (t, *J* = 7.3 Hz, 1H), 7.29 (t, *J* = 7.4 Hz, 1H), 7.22 (d, *J* = 7.6 Hz, 1H), 5.01 (s, 1H), 4.65 (s, 1H), 3.12 – 3.01 (m, 1H), 3.01 – 2.91 (m, 1H), 2.67 – 2.54 (m, 1H), 2.53 – 2.43 (m, 1H), 2.41 – 2.29 (m, 1H), 2.29 – 2.18 (m, 1H), 2.04 – 1.90 (m, 1H), 1.87 – 1.76 (m, 1H), 1.76 – 1.65 (m, 2H); <sup>13</sup>C NMR (151 MHz, CDCl<sub>3</sub>) δ 203.13, 157.96, 146.40, 135.75, 134.78, 131.32, 130.73, 129.27, 109.75, 59.45, 39.27, 36.77, 36.63, 28.87, 25.51; IR (neat) 2829, 2874, 1677, 1598, 1452, 1430, 1317, 1218, 889, 740 cm<sup>-1</sup>; HRMS (DART) Calcd for C<sub>15</sub>H<sub>17</sub>O (MH<sup>+</sup>): 213.12739; found: 213.12739; HPLC (Chiralcel OJ-H; 1%/ 99% isopropanol/ hexanes, 0.5 mL/min; tr = 15.6 min (major), 17.6 min (minor); 68:32 er); [α]<sub>D</sub><sup>25</sup> = +4.0° (c = 1.0, CH<sub>2</sub>Cl<sub>2</sub>). The absolute configuration for this product was assigned in analogy to that determined for product **2a**.





## 4. Determination of Absolute Configuration

To determine the absolute configuration of **2a**, it was first transformed to **6a** according to a literature procedure.<sup>16-17</sup> **6a** was then recrystallized and its X-ray crystallographic analysis was carried out as described below.

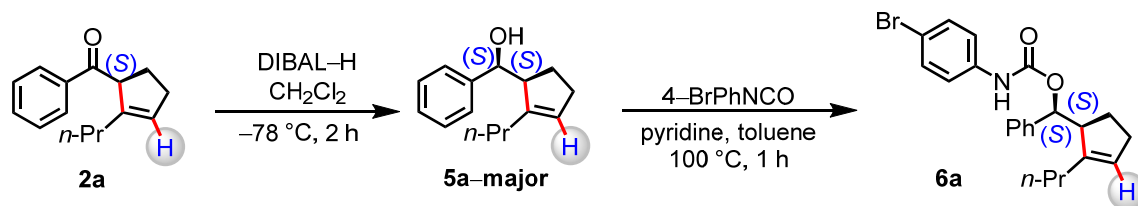

### (S)-Phenyl((S)-2-propylcyclopent-2-en-1-yl)methanol (**5a-major**)

To a solution of (S)-phenyl(2-propylcyclopent-2-en-1-yl)methanone **2a** (642 mg, 3.0 mmol, 1.0 equiv.) in CH<sub>2</sub>Cl<sub>2</sub> (0.1 M) was added DIBAL-H (1.7 g, 12 mmol, 4.0 equiv.), dropwise at -78 °C. The reaction mixture was allowed to stir for 2 h at -78 °C. Then, 1N HCl (30 mL) was added to the solution. The reaction mixture was extracted with CH<sub>2</sub>Cl<sub>2</sub> (3 x 30 mL). The combined organic layers were washed with brine (2 x 50 mL) and dried over Na<sub>2</sub>SO<sub>4</sub>. After filtration and removal of the solvent, <sup>1</sup>H NMR analysis of the crude material revealed that **5a-major** and **5a-minor** were obtained in the ratio of 1.2:1.0. The crude material was purified by silica gel column chromatography (1.0 % Et<sub>2</sub>O in hexanes) to give compound **5a-major** (314 mg, 48%) as a colorless oil. <sup>1</sup>H NMR (500 MHz, CDCl<sub>3</sub>) δ 7.37 – 7.28 (m, 4H), 7.26 – 7.21 (m, 1H), 5.45 (s, 1H), 4.73 (t, *J* = 5.1 Hz, 1H), 3.07 – 3.01 (m, 1H), 2.19 – 1.95 (m, 3H), 1.94 – 1.79 (m, 3H), 1.72 (ddd, *J* = 12.7, 8.6, 4.3 Hz, 1H), 1.52 – 1.33 (m, 2H), 0.86 (t, *J* = 7.3 Hz, 3H).

### (S)-Phenyl((S)-2-propylcyclopent-2-en-1-yl)methyl (4-bromophenyl)carbamate (**6a**)

To a solution of **5a-major** (151 mg, 0.70 mmol, 1.0 equiv.) in toluene (0.035 M) were added *p*-bromophenyl isocyanate (416 mg, 2.1 mmol, 3.0 equiv.) and pyridine (277 mg, 3.5 mmol, 5.0 equiv.). The resulting heterogeneous solution was allowed to stir at 100 °C for 1 h. The solution was then cooled and filtered through a short plug of Celite using CH<sub>2</sub>Cl<sub>2</sub>. The filtrate was concentrated and the residue was purified by silica gel column chromatography (10 % EtOAc in hexanes) to give compound **6a** (261 mg, 90%) as a white solid. **6a** was

recrystallized using the vapor-vapor diffusion method, using EtOH to dissolve the product in an inner vial, and pentane as the precipitant placed in the outer vial in order for slow diffusion to occur into the inner vial. The solution was placed at 0 °C, whereupon a crystal was obtained for X-ray crystallographic analysis which revealed that the absolute configuration of **6a** is (*S,S*); see **SI Section 7** for X-ray crystallographic data.

**<sup>1</sup>H NMR** (500 MHz, CDCl<sub>3</sub>) δ 7.39 (d, *J* = 8.6 Hz, 2H), 7.31 (d, *J* = 5.5 Hz, 4H), 7.30 – 7.24 (m, 4H), 6.64 (s, 1H), 5.74 (d, *J* = 6.6 Hz, 1H), 5.43 (s, 1H), 3.19 – 3.10 (m, 1H), 2.23 – 2.07 (m, 2H), 2.07 – 1.96 (m, 1H), 1.84 – 1.73 (m, 2H), 1.73 – 1.63 (m, 1H), 1.63 – 1.53 (m, 1H), 1.53 – 1.43 (m, 1H), 0.91 (t, *J* = 7.3 Hz, 3H); **<sup>13</sup>C NMR** (126 MHz, CDCl<sub>3</sub>) δ 152.55, 144.32, 138.95, 136.99, 131.93, 127.99, 127.71, 127.48, 126.82, 120.21, 115.91, 79.11, 51.32, 32.57, 30.45, 26.88, 21.06, 14.10; **IR** (neat) 3313, 2953, 2926, 1697, 1592, 1530, 1488, 1396, 1305, 1217, 1073, 1045, 822, 698 cm<sup>-1</sup>; **HRMS** (DART) Calcd for C<sub>22</sub>H<sub>25</sub>NO<sub>2</sub>Br (MH<sup>+</sup>): 414.10632; found: 414.10436; **HPLC** (Chiralcel OD-H; 5%/ 95% isopropanol/ hexanes, 1.0 mL/min; tr = 13.8 min (major), 7.0 min (minor); 97:3 er); [α]<sub>D</sub><sup>25</sup> = -46.0° (c = 1.0, CH<sub>2</sub>Cl<sub>2</sub>).

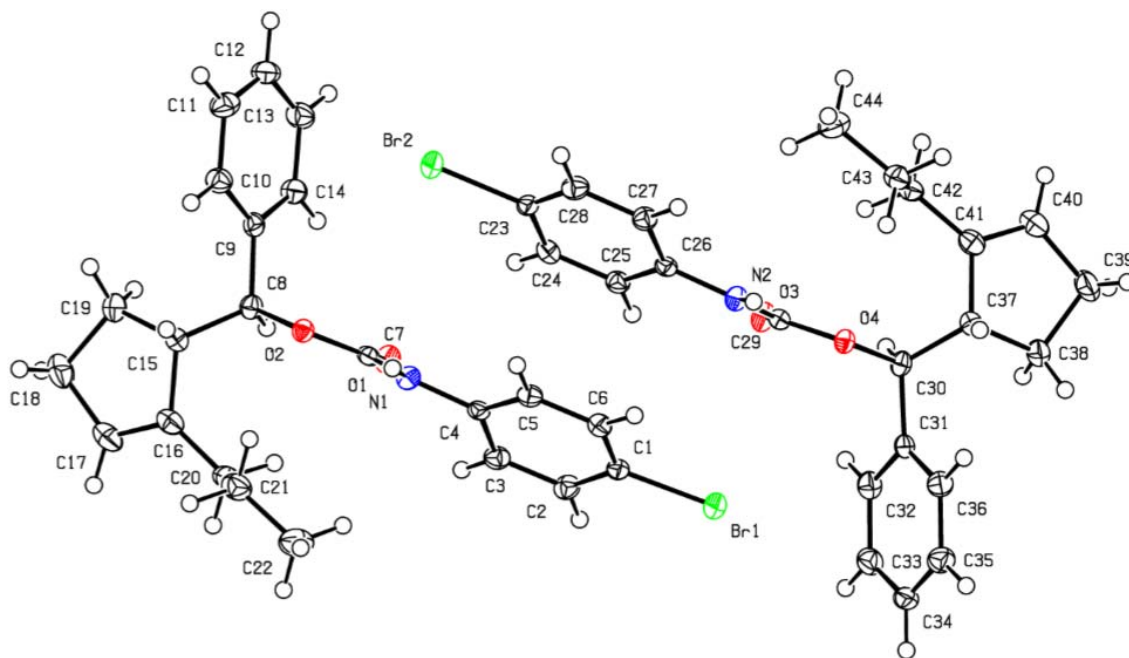

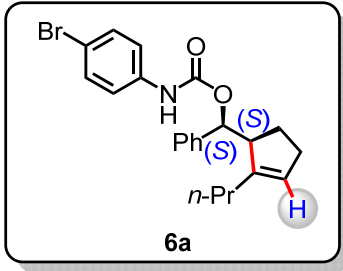

Acq. Operator : SYSTEM  
 Acq. Instrument : Wasa\_LC1  
 Injection Date : 12/13/2018 5:19:00 PM  
 Method : C:\Chem32\1\Data\JOE 2018-12-13 17-17-55\column3 5% IPA 95% hex 30min-1.0ml.M (Sequence Method)  
 Last changed : 12/13/2018 5:17:58 PM by SYSTEM  
 Method Info : column3 5% IPA 95% hex 30min-1.0ml.M

Seq. Line : 1  
 Location : 51  
 Inj : 1  
 Inj Volume : 4.000 µl

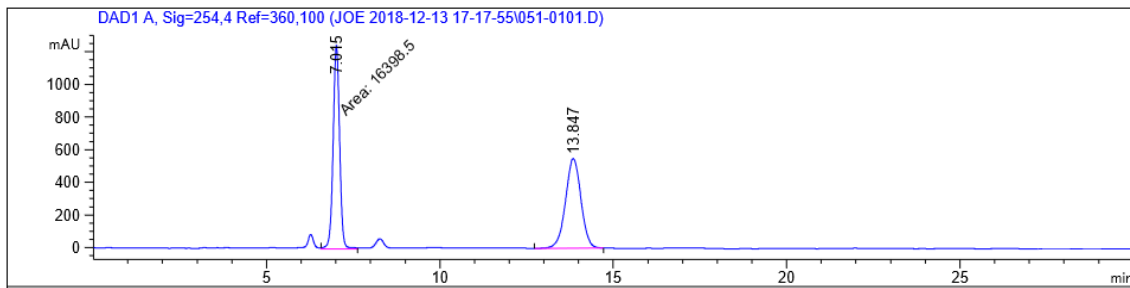

Signal 1: DAD1 A, Sig=254,4 Ref=360,100

| Peak # | RetTime [min] | Type | Width [min] | Area [mAU*s] | Height [mAU] | Area %  |
|--------|---------------|------|-------------|--------------|--------------|---------|
| 1      | 7.015         | MM   | 0.2188      | 1.63985e4    | 1248.84399   | 49.1235 |
| 2      | 13.847        | BB   | 0.4789      | 1.69836e4    | 548.99237    | 50.8765 |

Totals : 3.33821e4 1797.83636

```

Acq. Operator   : SYSTEM                      Seq. Line :    2
Acq. Instrument : Wasa_LC1                    Location  :   52
Injection Date  : 12/13/2018 5:49:59 PM      Inj       :    1
                                           Inj Volume: 4.000 µl
Method          : C:\Chem32\1\Data\JOE 2018-12-13 17-17-55\column3 5% IPA 95% hex 30min-1.0ml.M (Sequence Method)
Last changed    : 12/13/2018 5:17:58 PM by SYSTEM
Method Info     : column3 5% IPA 95% hex 30min-1.0ml.M
  
```

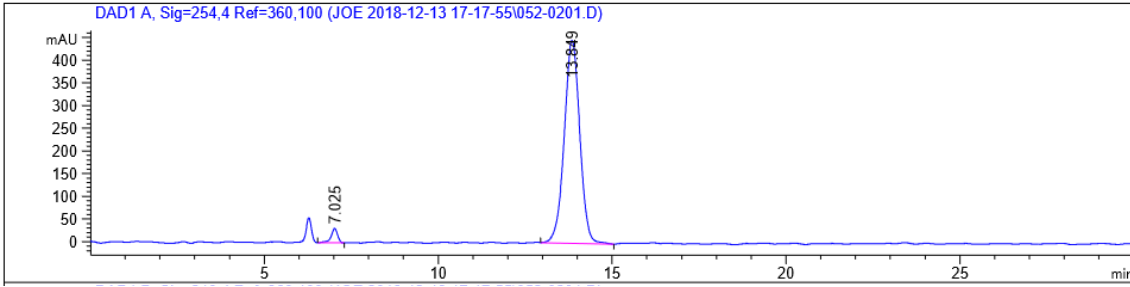

Signal 1: DAD1 A, Sig=254,4 Ref=360,100

| Peak #   | RetTime [min] | Type | Width [min] | Area [mAU*s] | Height [mAU] | Area %  |
|----------|---------------|------|-------------|--------------|--------------|---------|
| 1        | 7.025         | VB   | 0.2011      | 424.25800    | 31.91942     | 2.9631  |
| 2        | 13.849        | BB   | 0.4810      | 1.38937e4    | 446.47955    | 97.0369 |
| Totals : |               |      |             | 1.43180e4    | 478.39898    |         |



## 5. References

- (1) Tse, M. D.; Bhor, S.; Klawonn, M.; Anilkumar, G.; Jiao, H.; Döbler, C.; Spannenberg, A.; Mägerlein, W.; Hugl, H.; Beller, M. Ruthenium-Catalyzed Asymmetric Epoxidation of Olefins Using H<sub>2</sub>O<sub>2</sub>, Part I: Synthesis of New Chiral *N, N, N*-Tridentate Pybox and Pyboxazine Ligands and Their Ruthenium Complexes. *Chem. Eur. J.* **2006**, *12*, 1855-1874.
- (2) Thorhauge, J.; Roberson, M.; Hazell, R. G.; Jørgensen, K. A. On the Intermediates in Chiral Bis(oxazoline)copper(II)-Catalyzed Enantioselective Reactions—Experimental and Theoretical Investigations. *Chem. Eur. J.* **2002**, *8*, 1888-1898.
- (3) Desimoni, G.; Faita, G.; Jørgensen, K. A. C<sub>2</sub>-Symmetric Chiral Bis(oxazoline) Ligands in Asymmetric Catalysis. *Chem. Rev.* **2011**, *111*, 284-437.
- (4) Itoh, K.; Sibi, M. P. Dibenzofuran-4, 6-bis (oxazoline)(DBFOX). A novel *trans*-chelating bis(oxazoline) Ligand for asymmetric reactions. *Org. Biomol. Chem.* **2018**, *16*, 5551-5565.
- (5) Kamijo, S.; Dudley, G. B. Tandem Nucleophilic Addition/Fragmentation Reactions and Synthetic Versatility of Vinylogous Acyl Triflates. *J. Am. Chem. Soc.* **2006**, *128*, 6499-6507.
- (6) Wang, L.; Neumann, H.; Beller, M. A General, Activator-Free Palladium-Catalyzed Synthesis of Arylacetic and Benzoic Acids from Formic Acid. *Angew. Chem., Int. Ed.* **2018**, *57*, 6910-6914.
- (7) Chen, W.; Ma, L.; Paul, A.; Seidel, D. Direct  $\alpha$ -C-H bond functionalization of unprotected cyclic amines. *Nat. Chem.* **2018**, *10*, 165-169.
- (8) Ramachary, D. B.; Kishor, M. Organocatalytic Sequential One-Pot Double Cascade Asymmetric Synthesis of Wieland-Miescher Ketone Analogues from a Knoevenagel/Hydrogenation/Robinson Annulation Sequence: Scope and Applications of Organocatalytic Biomimetic Reductions. *J. Org. Chem.* **2007**, *72*, 5056-5068.
- (9) Zhao, Y. S.; Tang, X. Q.; Tao, J. C.; Tian, P.; Lin, G. Q. Efficient access to *cis*-decalinol frameworks: copper(I)-catalyzed borylative cyclization of allene cyclohexanediones. *Org. Biomol. Chem.* **2016**, *14*, 4400-4404.

- (10) Wu, X.; Chen, Z.; Bai, Y. B.; Dong, V. M. Diastereodivergent Construction of Bicyclic  $\gamma$ -Lactones via Enantioselective Ketone Hydroacylation. *J. Am. Chem. Soc.* **2016**, *138*, 12013–12016.
- (11) Wu, Y.; Arenas, I.; Broomfield, L. M.; Martin, E.; Shafir, A. Hypervalent Activation as a Key Step for Dehydrogenative *ortho* C–C Coupling of Iodoarenes. *Chem. Eur. J.* **2015**, *21*, 18779–18784.
- (12) Meiß, R.; Kumar, K.; Waldmann, H. Divergent Gold(I)-Catalyzed Skeletal Rearrangements of 1,7-Enynes. *Chem. Eur. J.* **2015**, *21*, 13526–13530.
- (13) Miesch, L.; Welsch, T.; Rietsch, V.; Miesch, M. Intramolecular Alkynylogous Mukaiyama Aldol Reaction Starting from Bicyclic Alkanones Tethered to Alkynyl Esters: Formal Total Synthesis of ( $\pm$ )-Hamigeran B. *Chem. Eur. J.* **2009**, *15*, 4394–4401.
- (14) Liu, G.; Stahl, S. S. Two-Faced Reactivity of Alkenes: *cis*- versus *trans*-Aminopalladation in Aerobic Pd-Catalyzed Intramolecular Aza-Wacker Reactions. *J. Am. Chem. Soc.* **2007**, *129*, 6328–6335.
- (15) Evans, D. A.; Peterson, G. S.; Johnson, J. S.; Barnes, D.M.; Campos, K.R.; Woerpel, K.A. An Improved Procedure for the Preparation of 2, 2-Bis [2-[4 (*S*)-*tert*-butyl-1, 3-oxazoliny]] propane [(*S, S*)-*tert*-Butylbis(oxazoline)] and Derived Copper(II) Complexes. *J. Org. Chem.* **1998**, *63*, 4541–4544.
- (16) Wadamoto, M.; Phillips, E. M.; Reynolds, T. E.; Scheidt, K. A. Enantioselective Synthesis of  $\alpha,\alpha$ -Disubstituted Cyclopentenes by an *N*-Heterocyclic Carbene-Catalyzed Desymmetrization of 1, 3-diketones. *J. Am. Chem. Soc.* **2007**, *129*, 10098–10099.
- (17) Petrone, D. A.; Isomura, M.; Franzoni, I.; Rössler, S. L.; Carreira, E.M. Allenylic Carbonates in Enantioselective Iridium-Catalyzed Alkylations. *J. Am. Chem. Soc.* **2018**, *140*, 4697–4704.

## 6. NMR Spectra for New Compounds

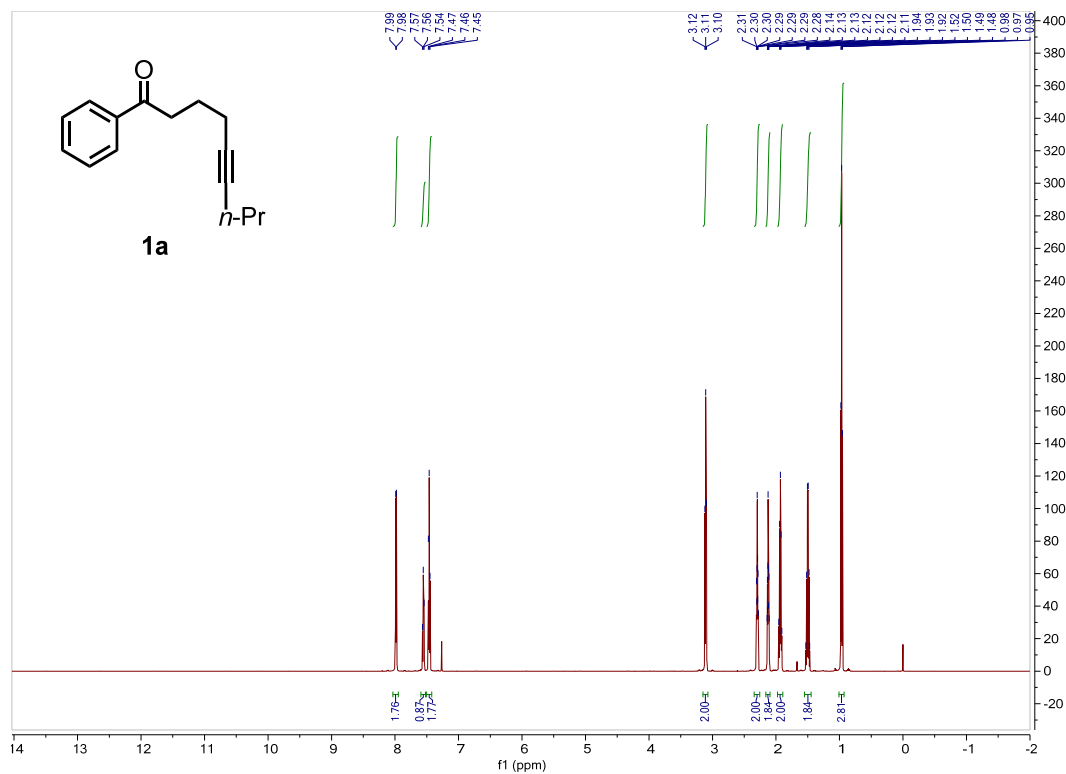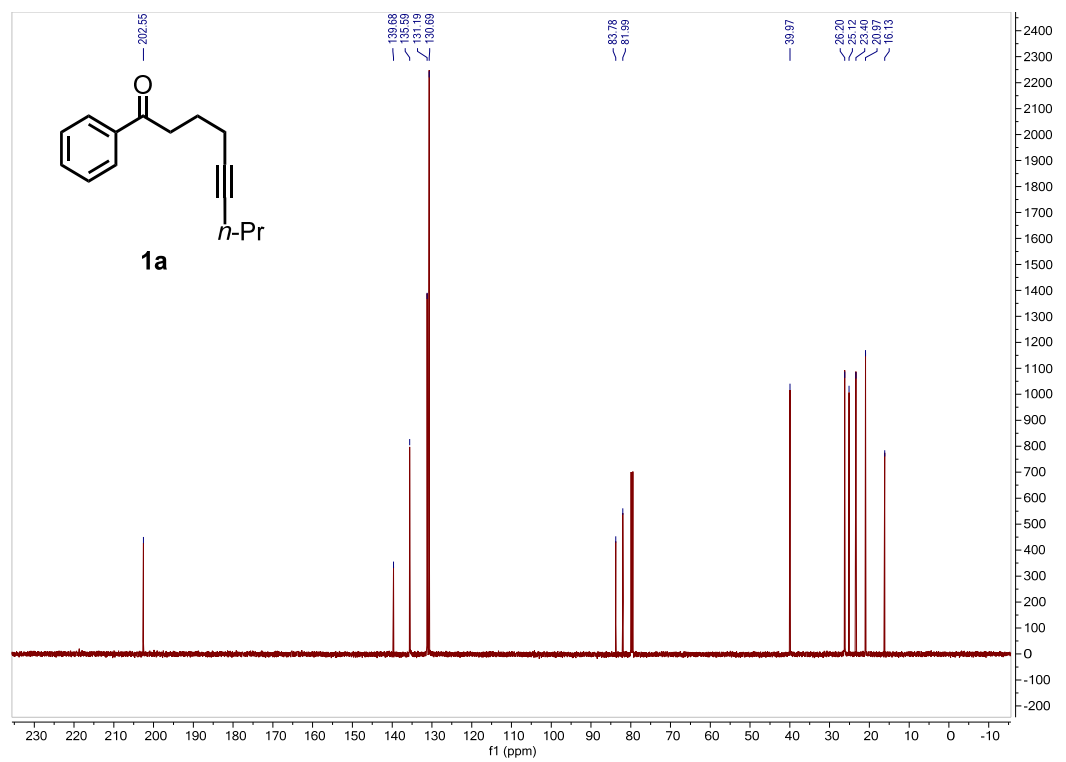

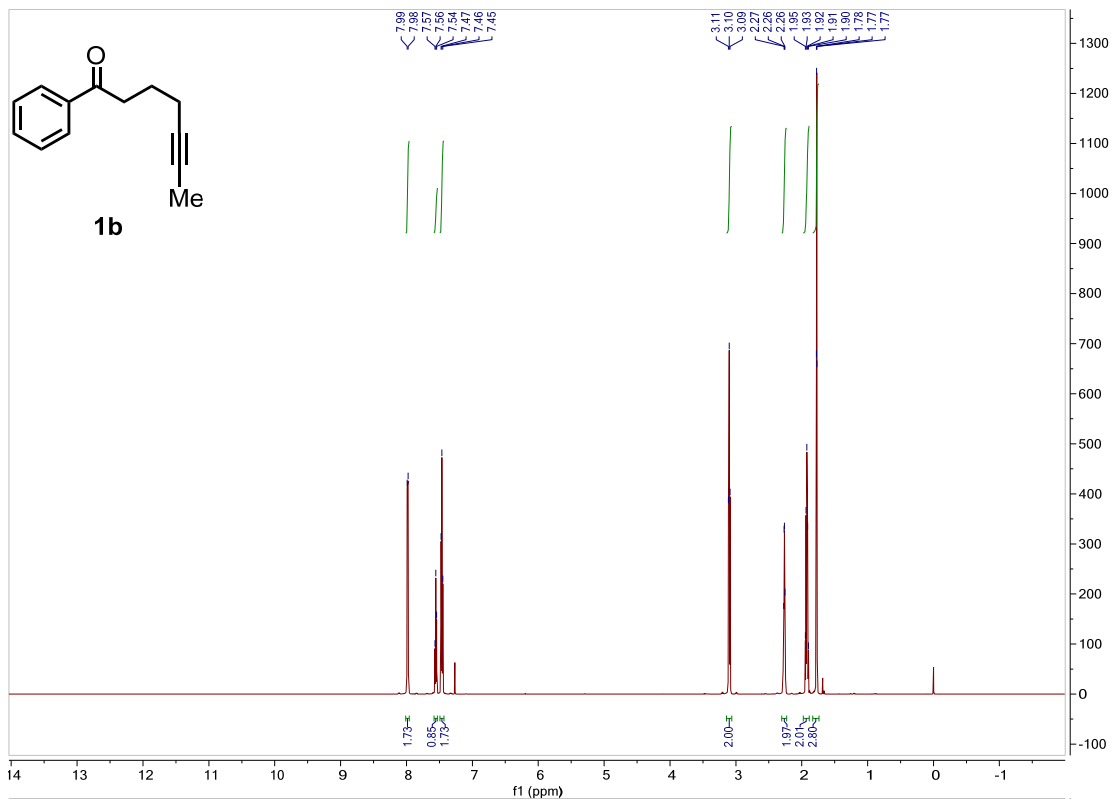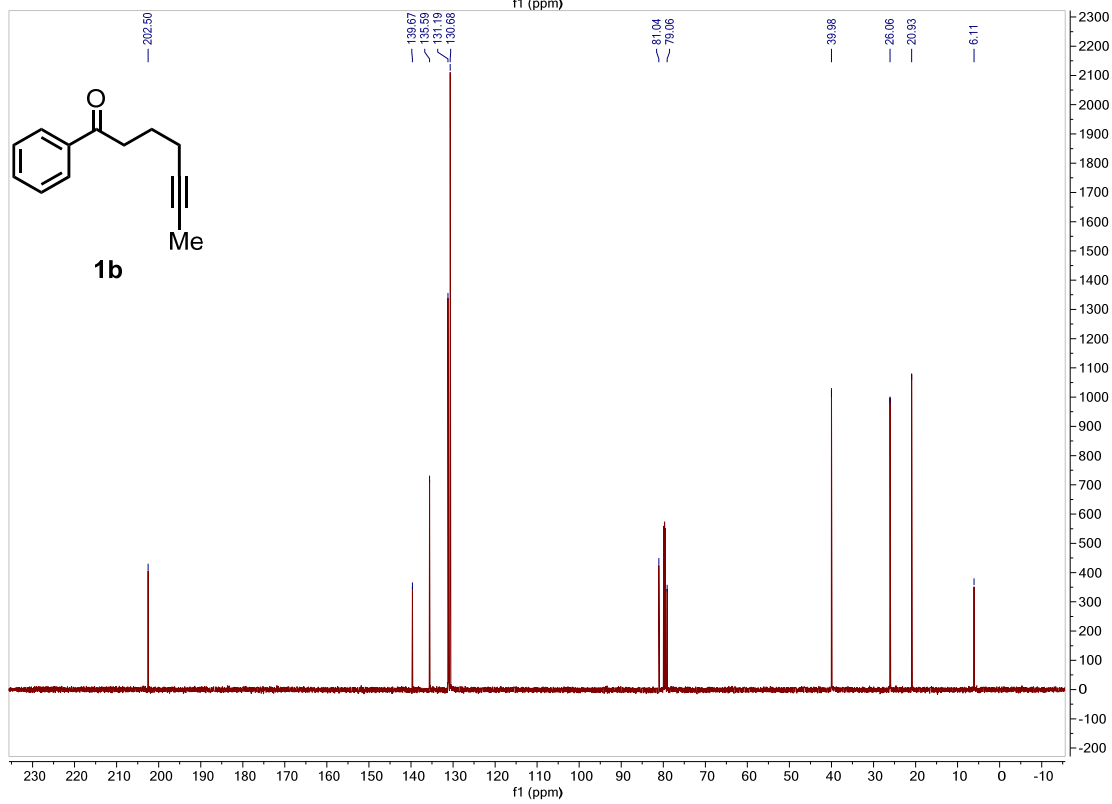

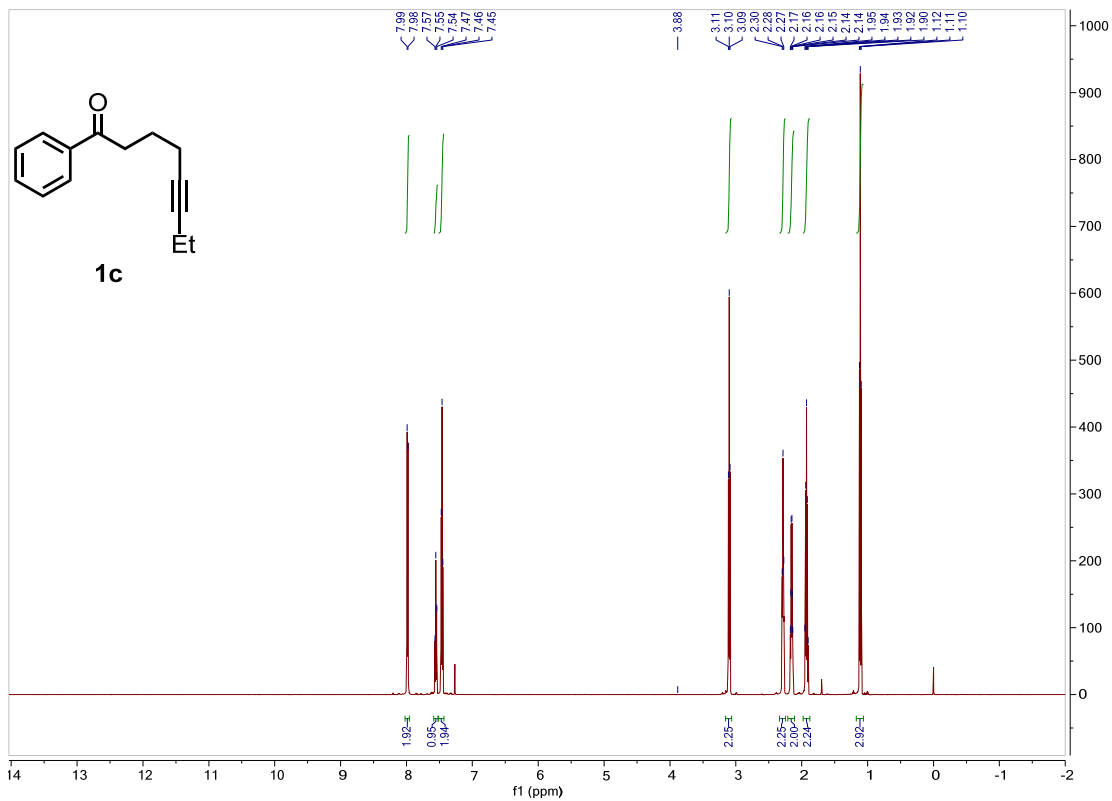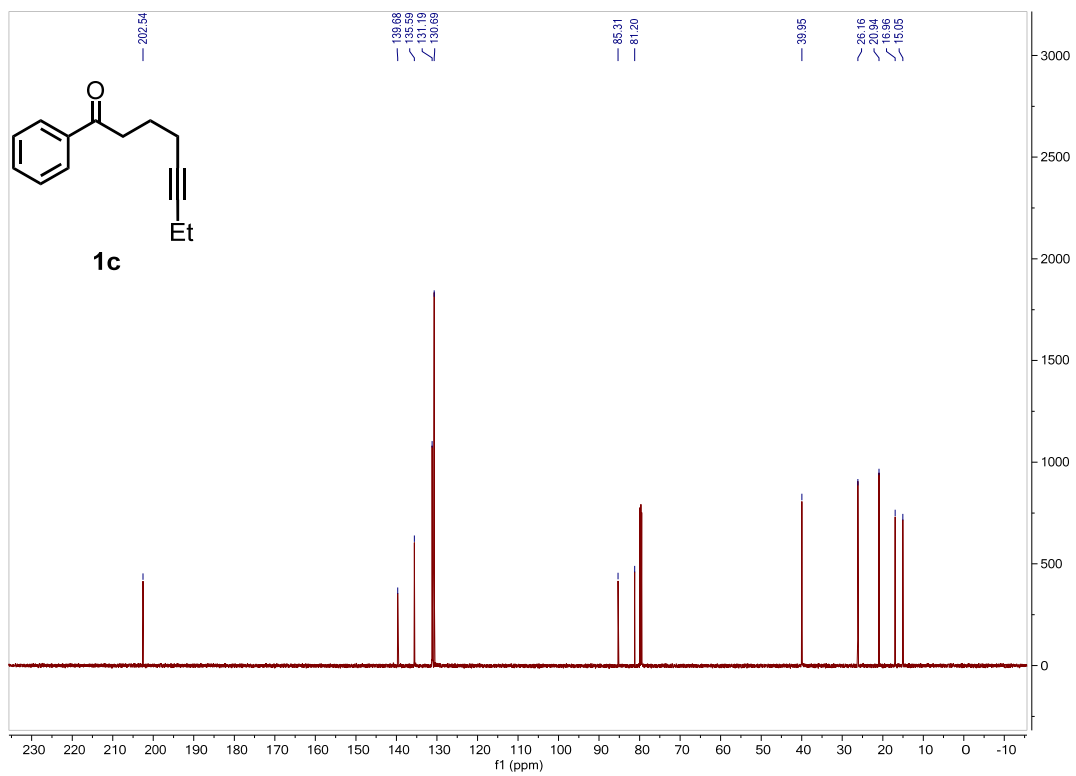

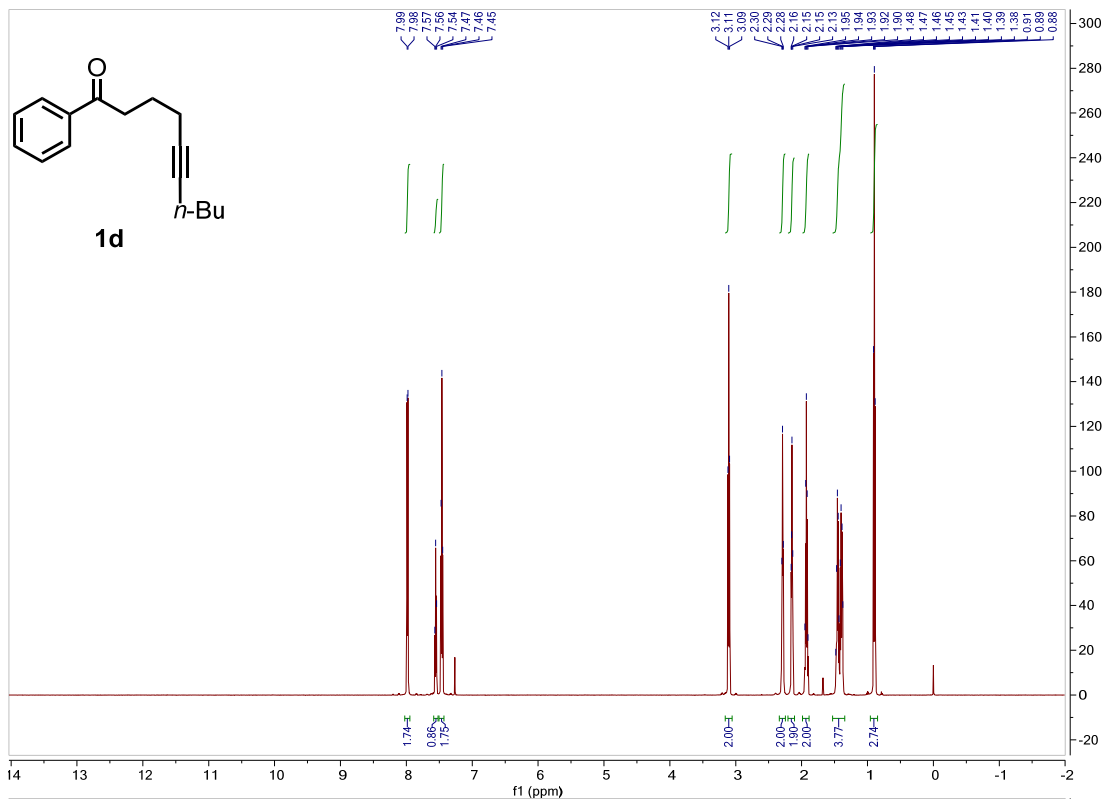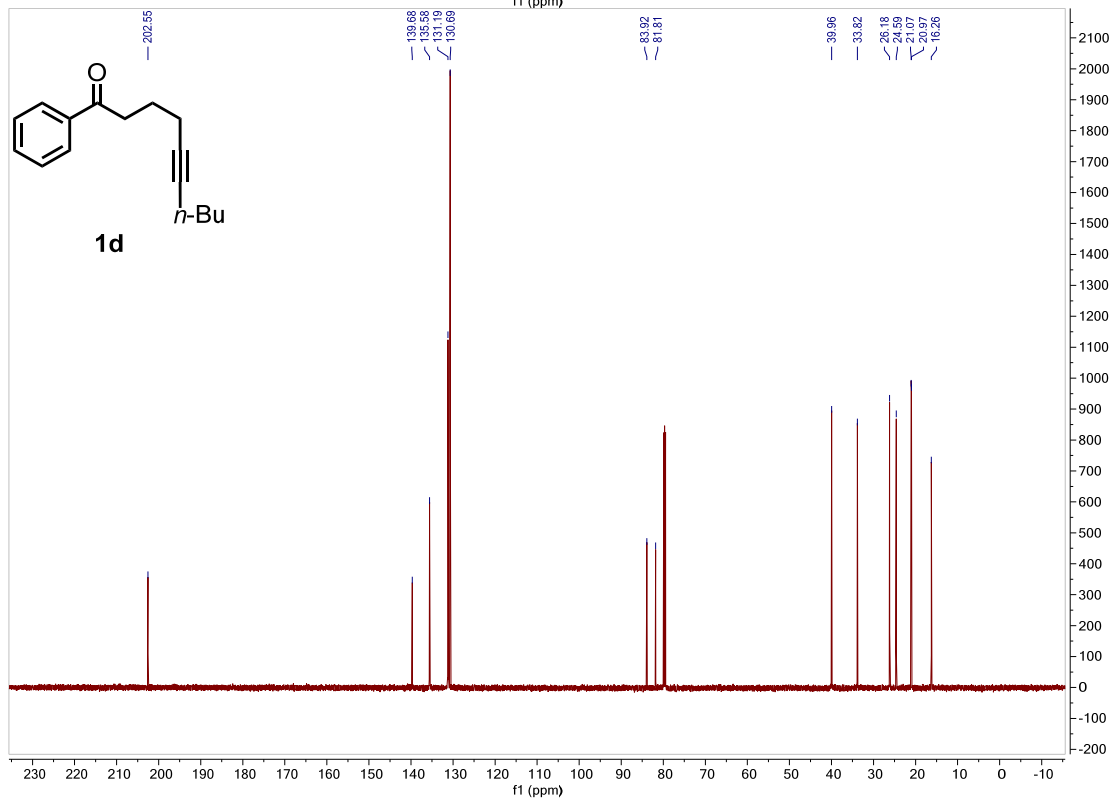

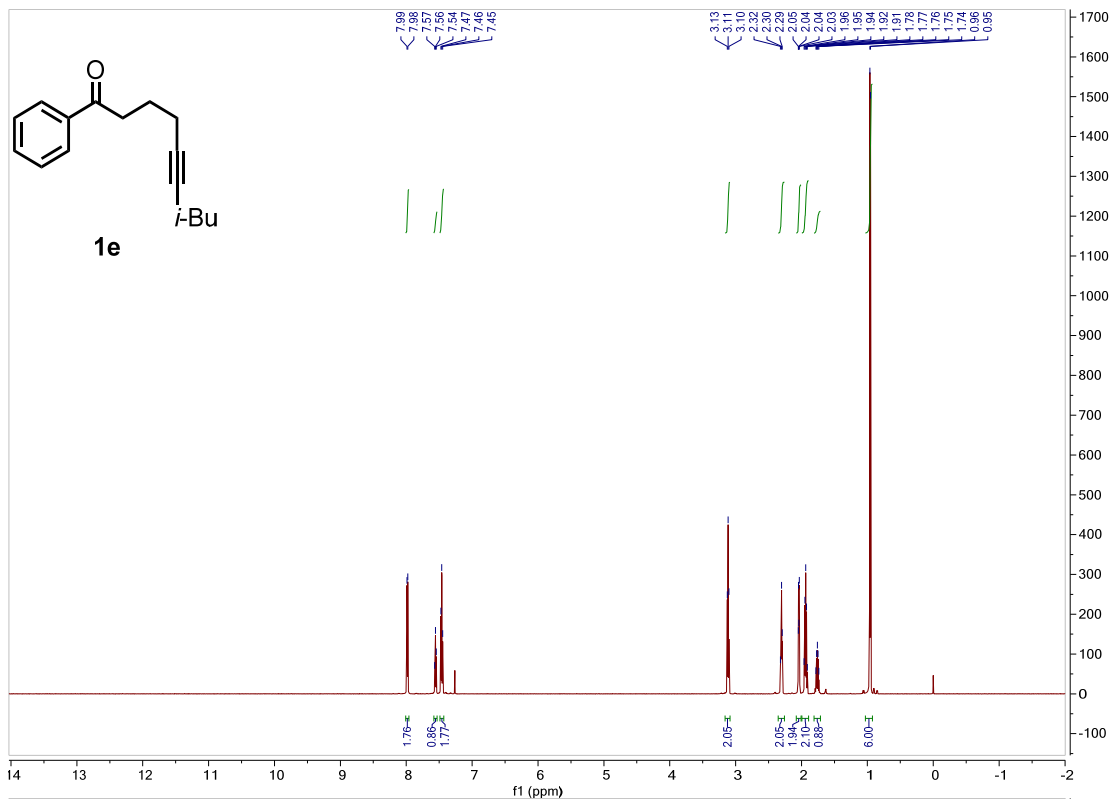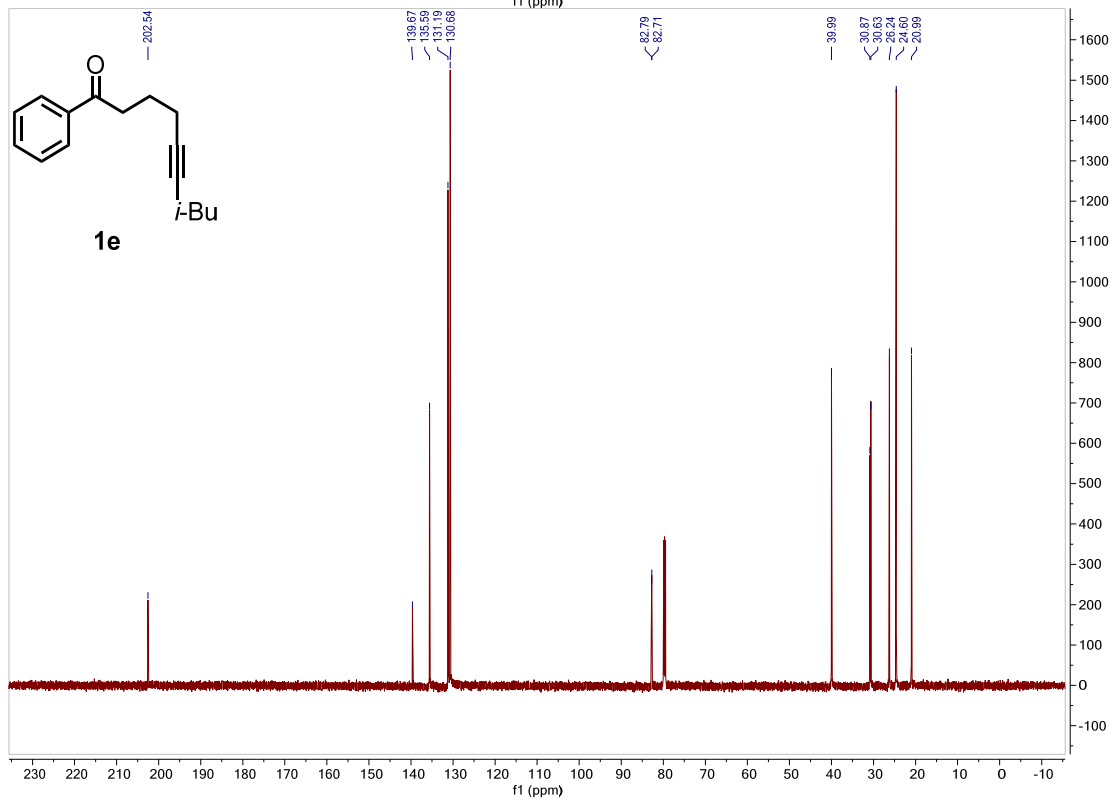

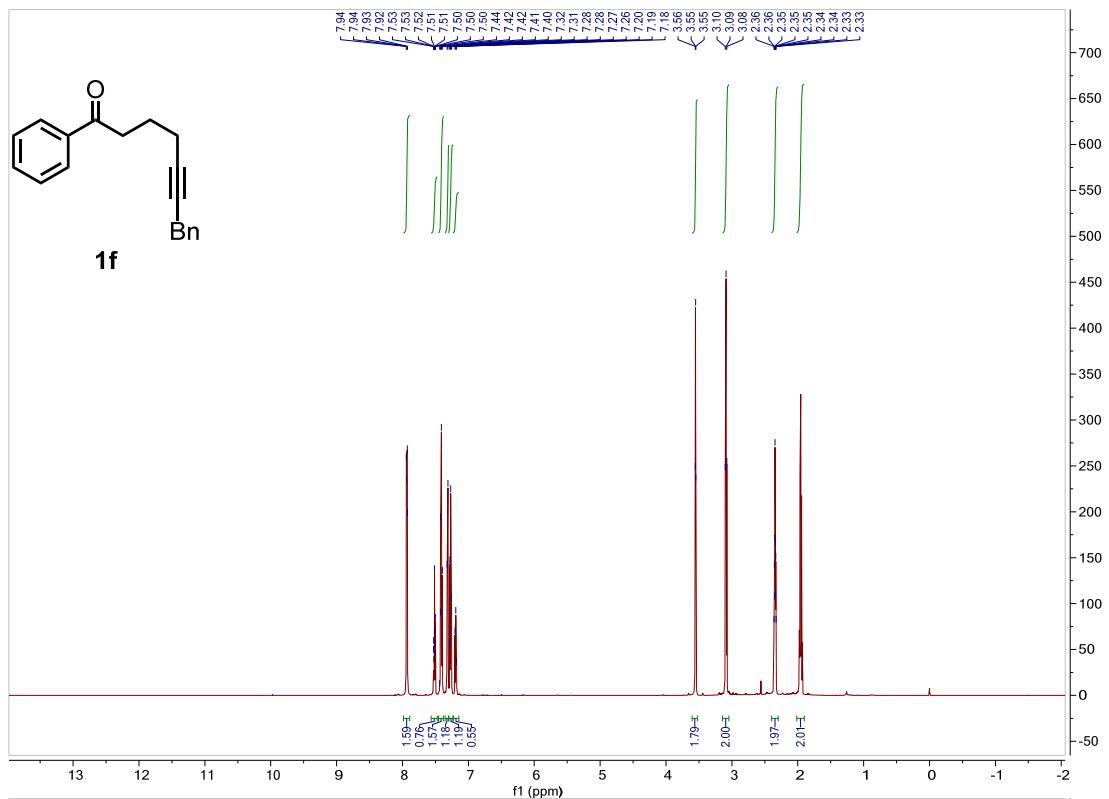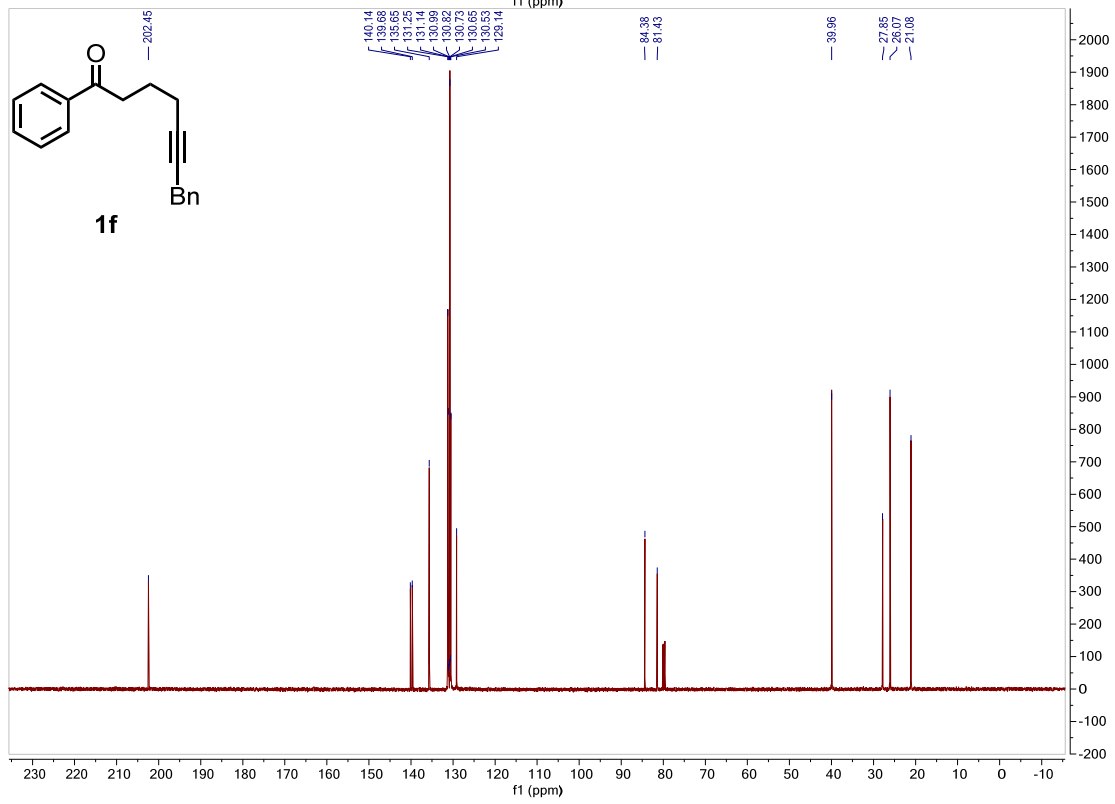



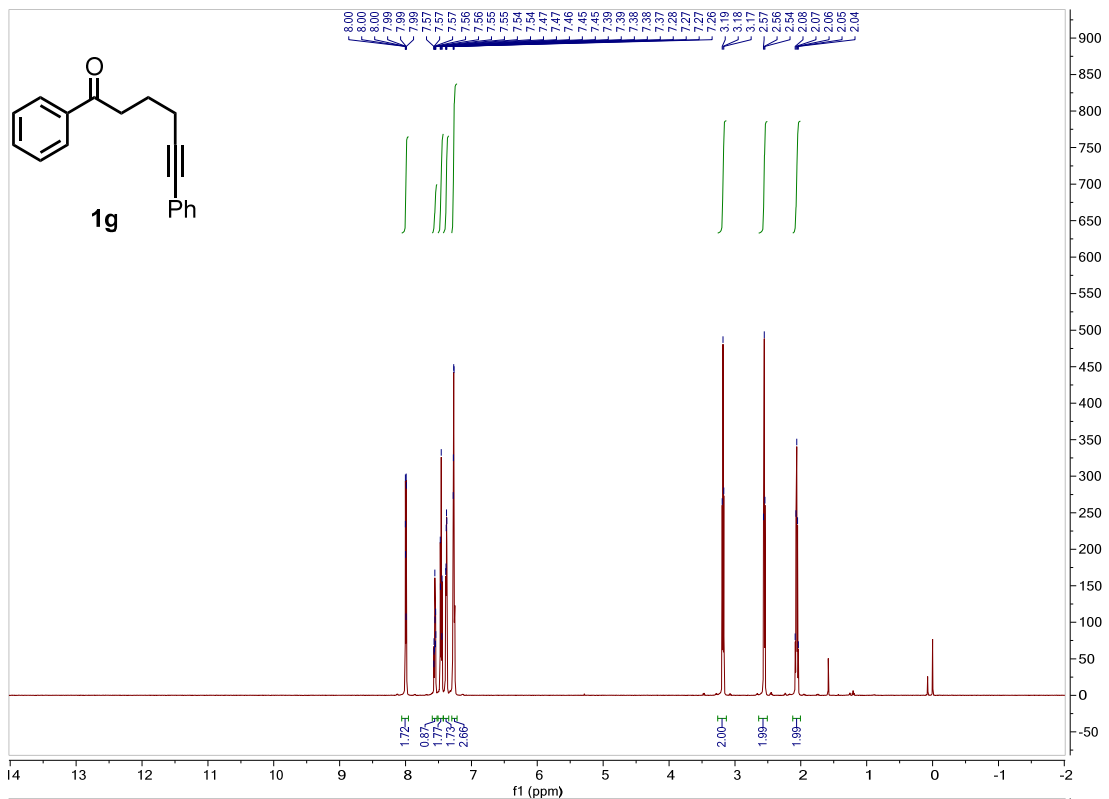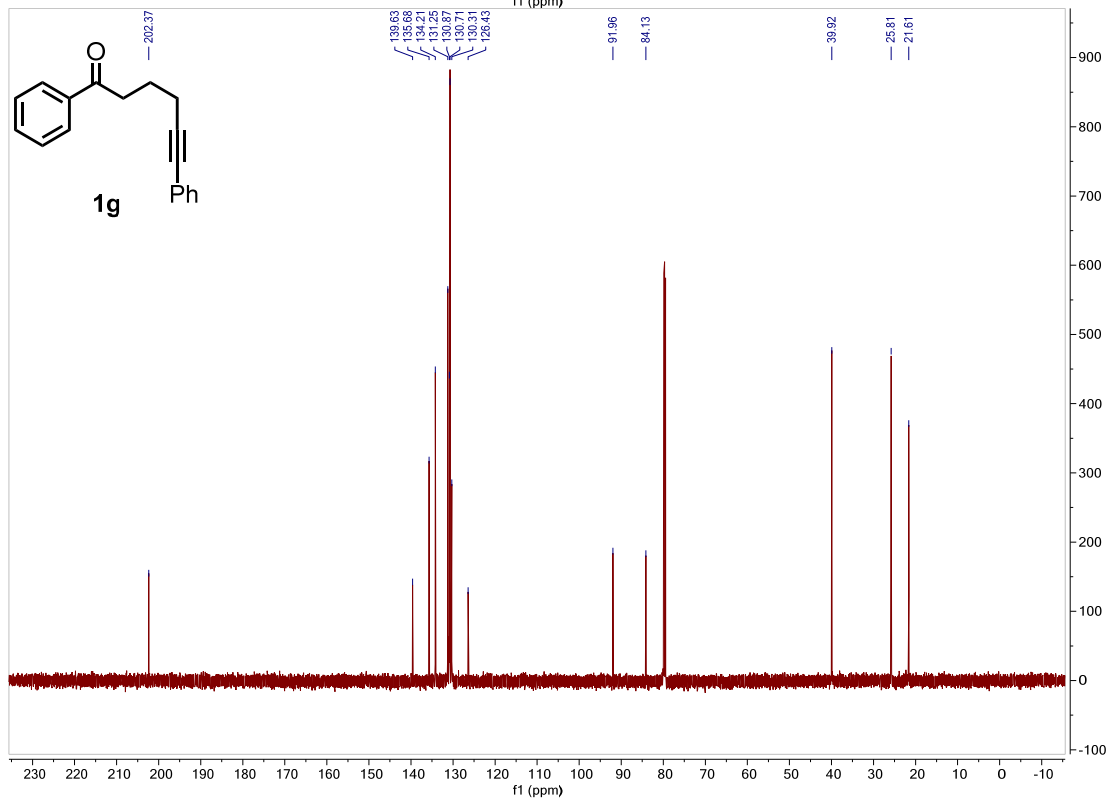

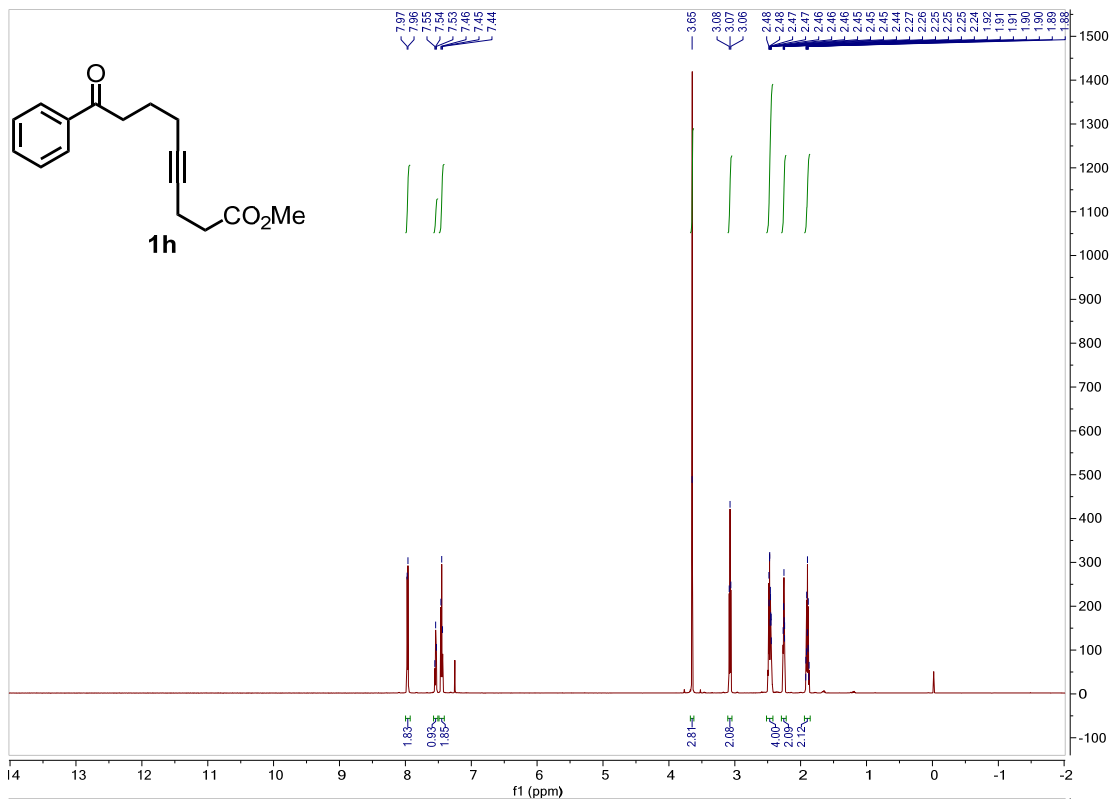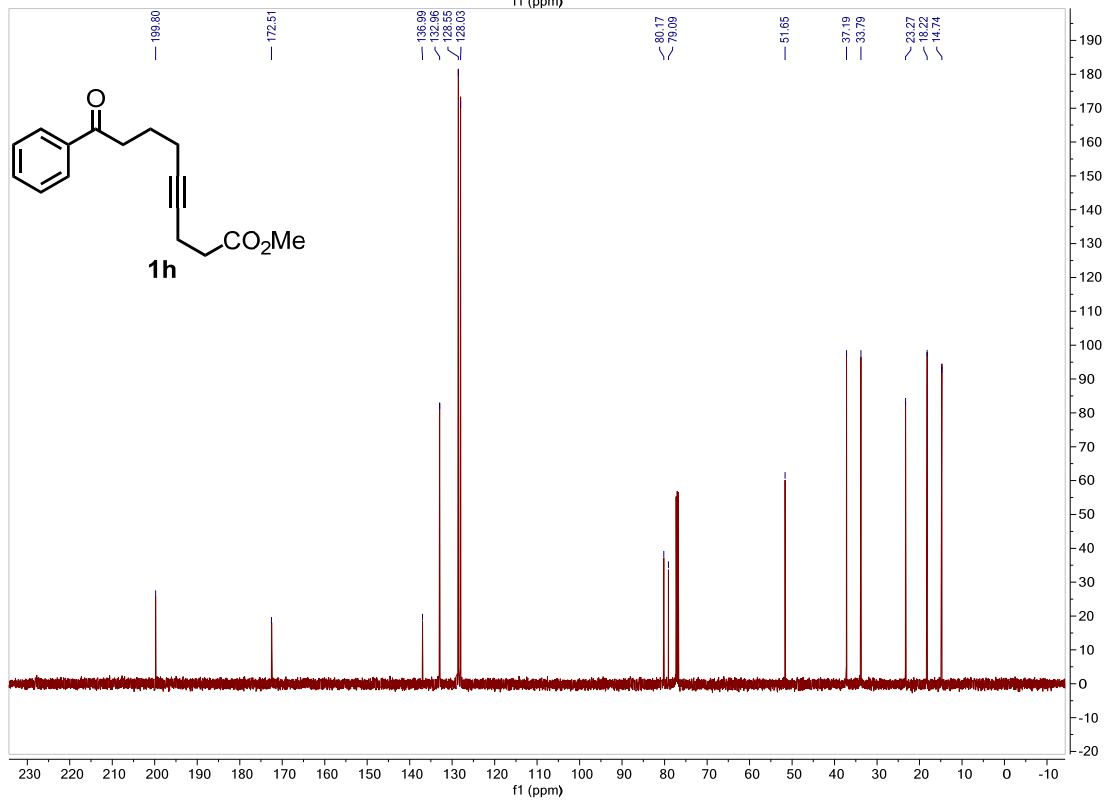

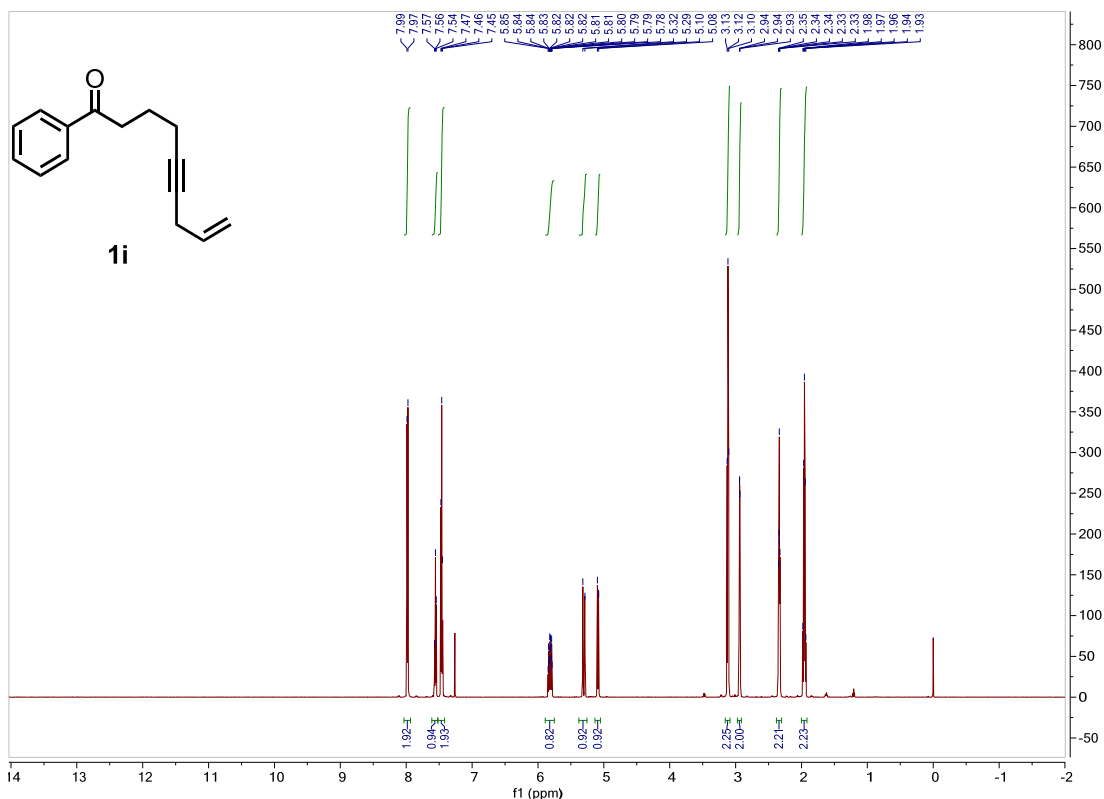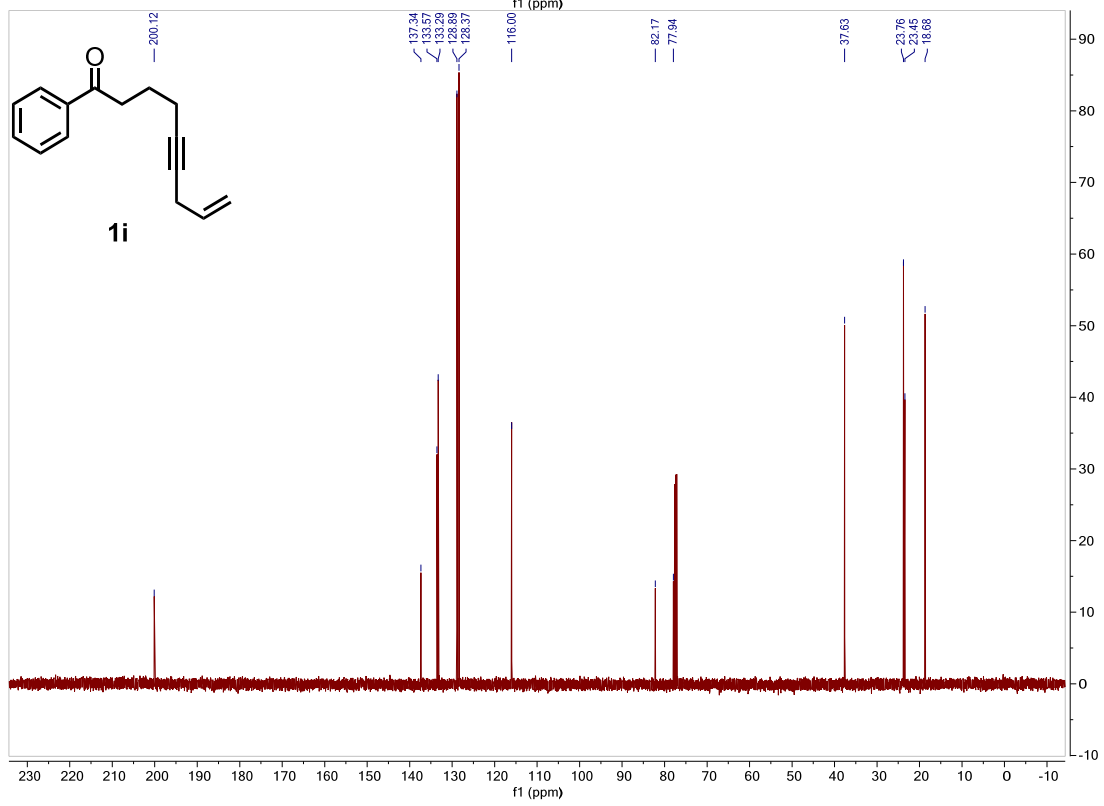

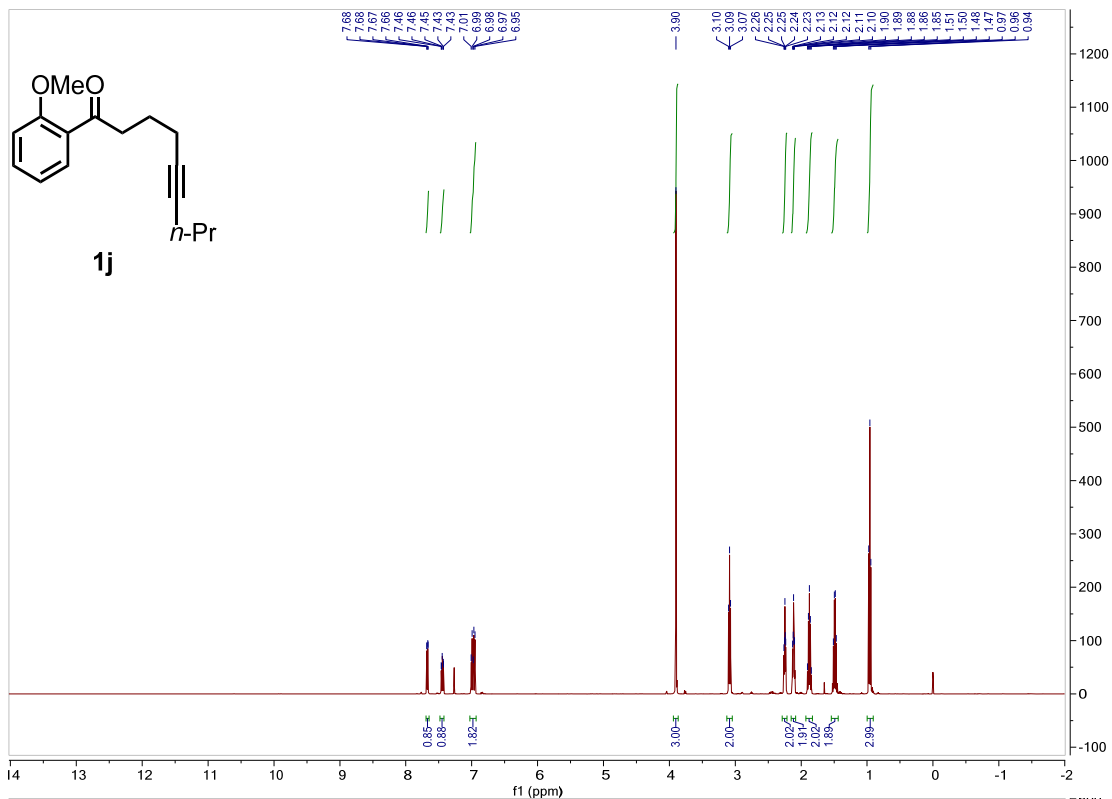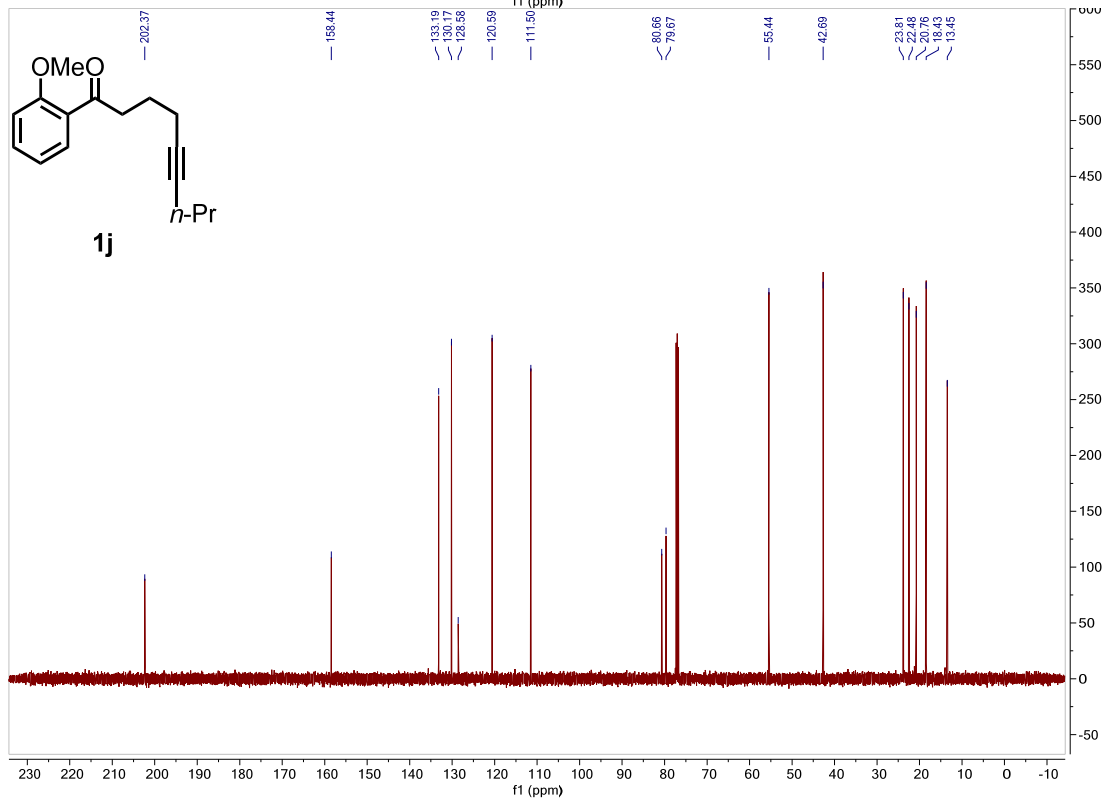

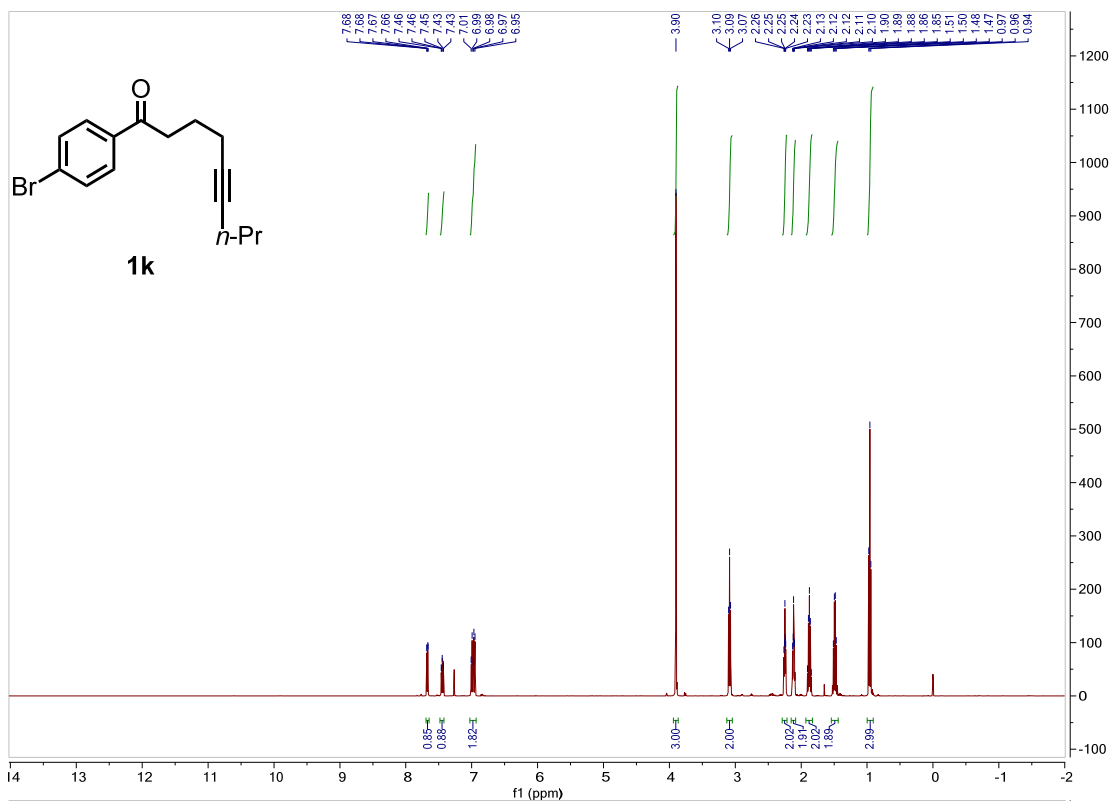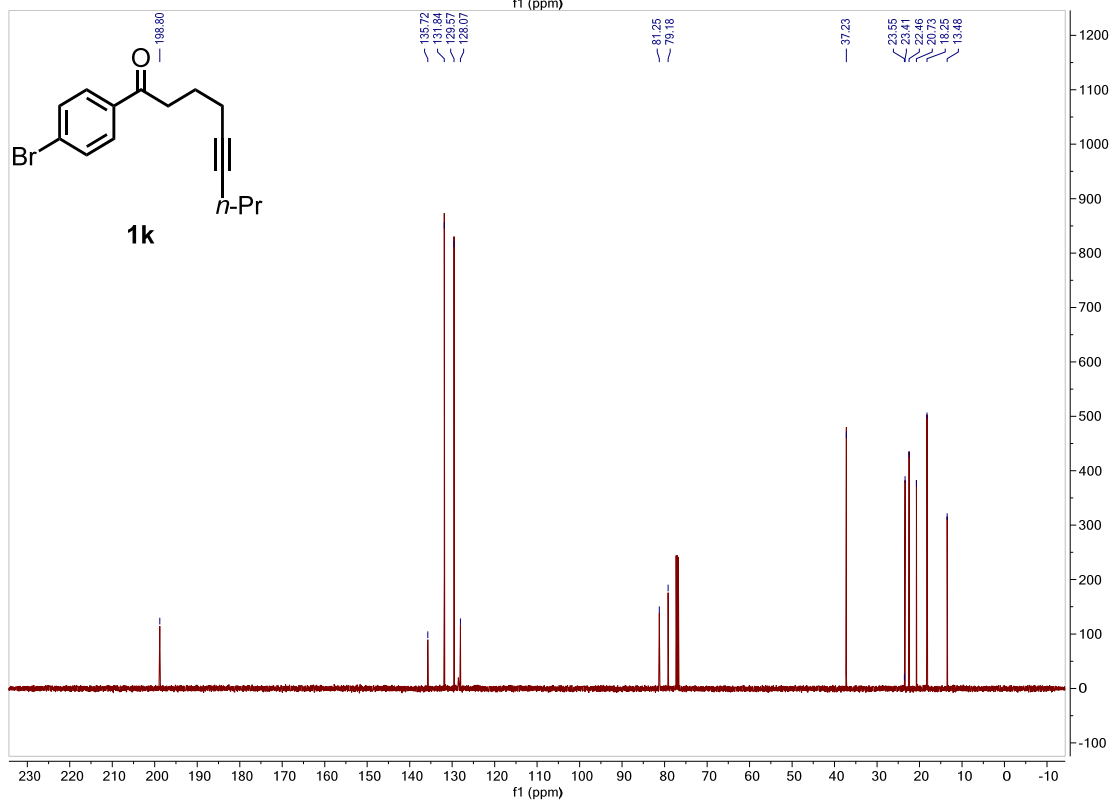

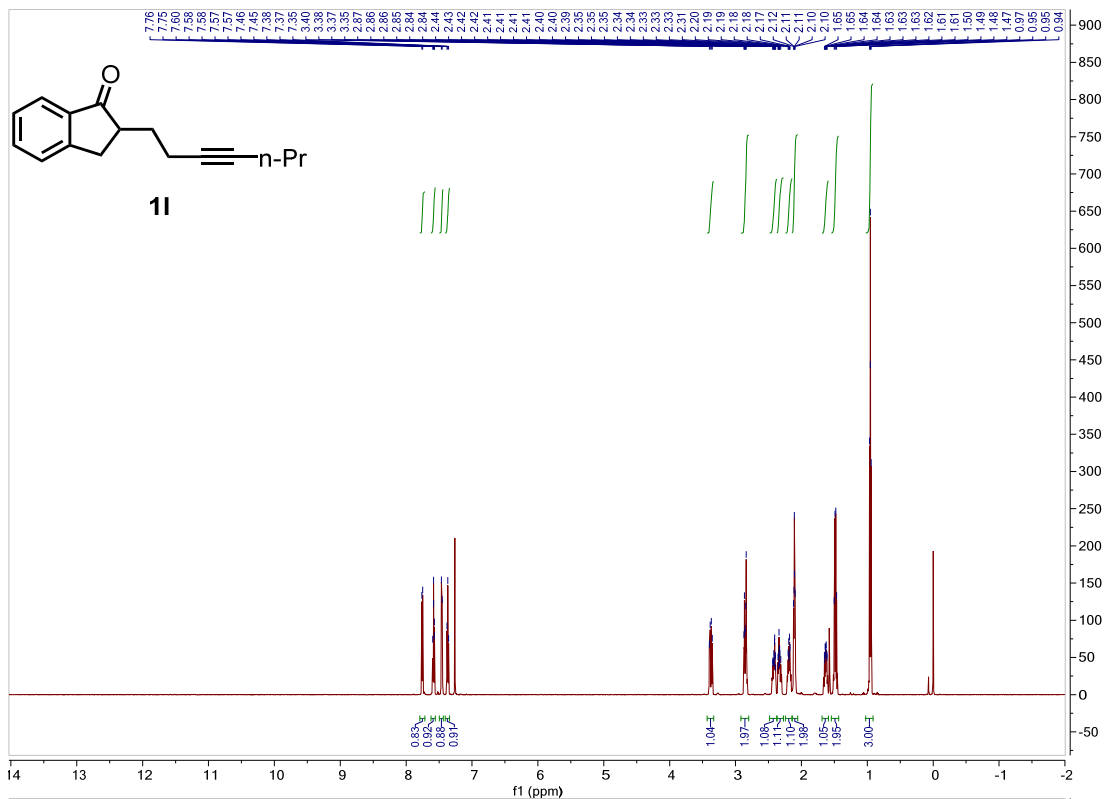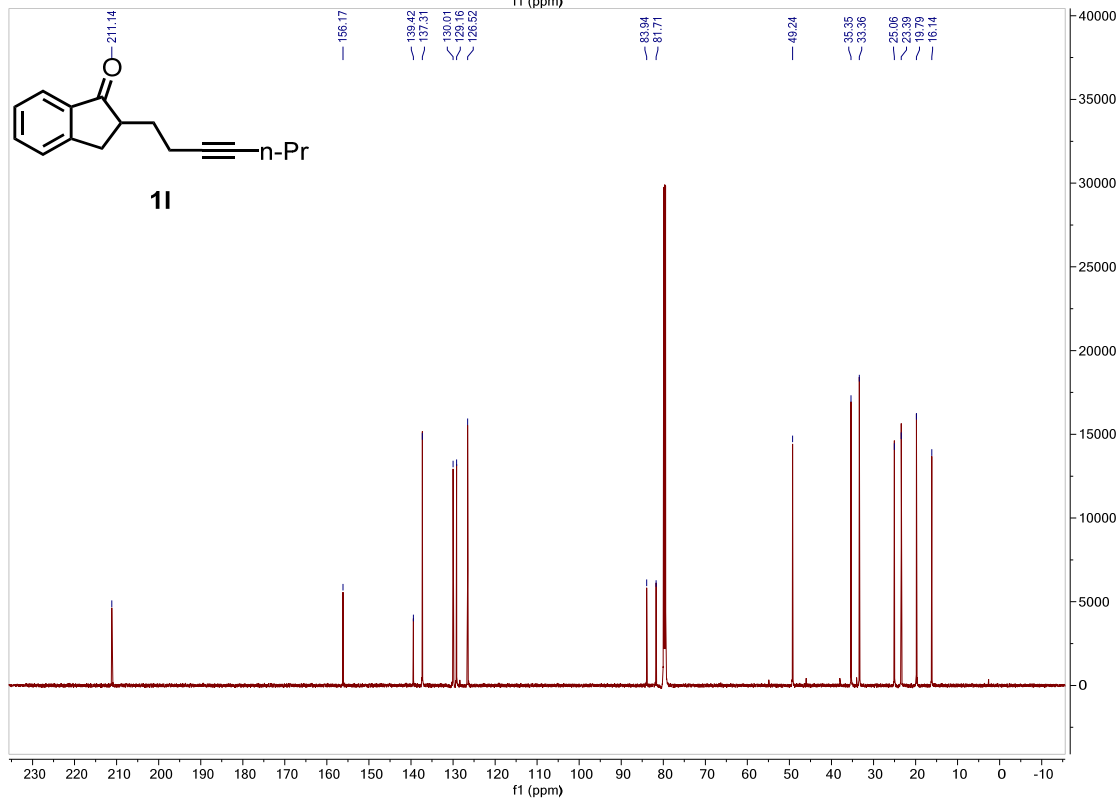

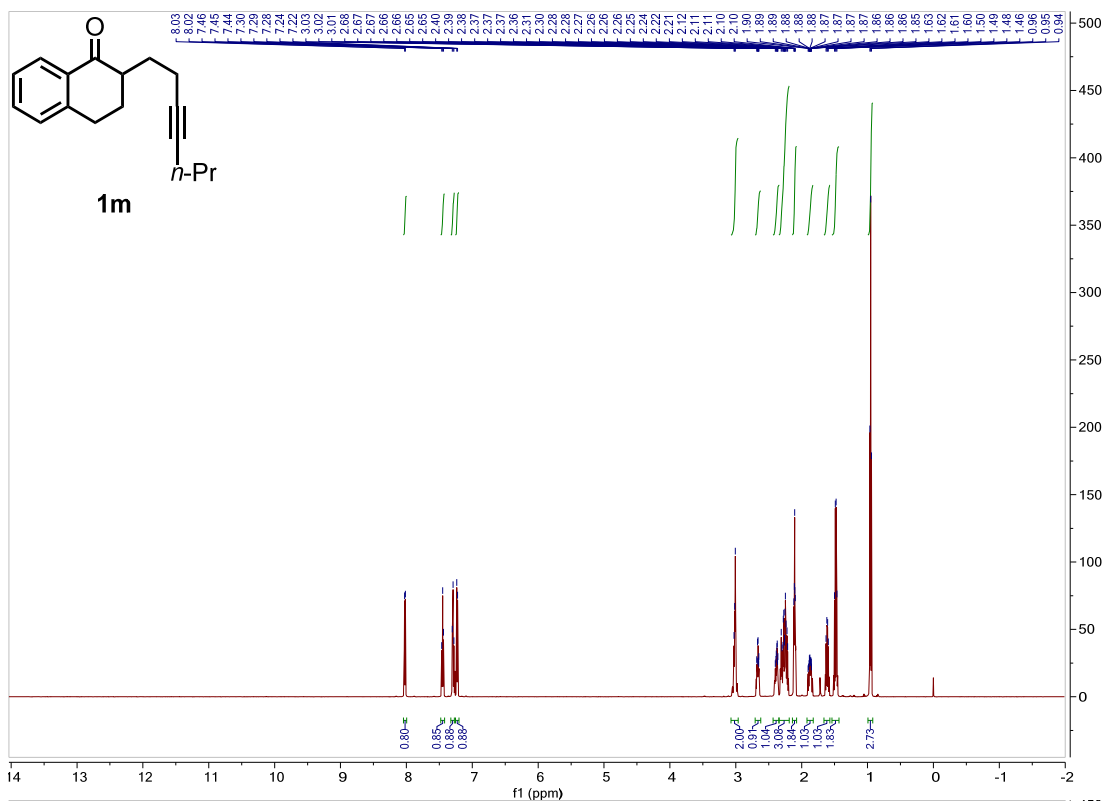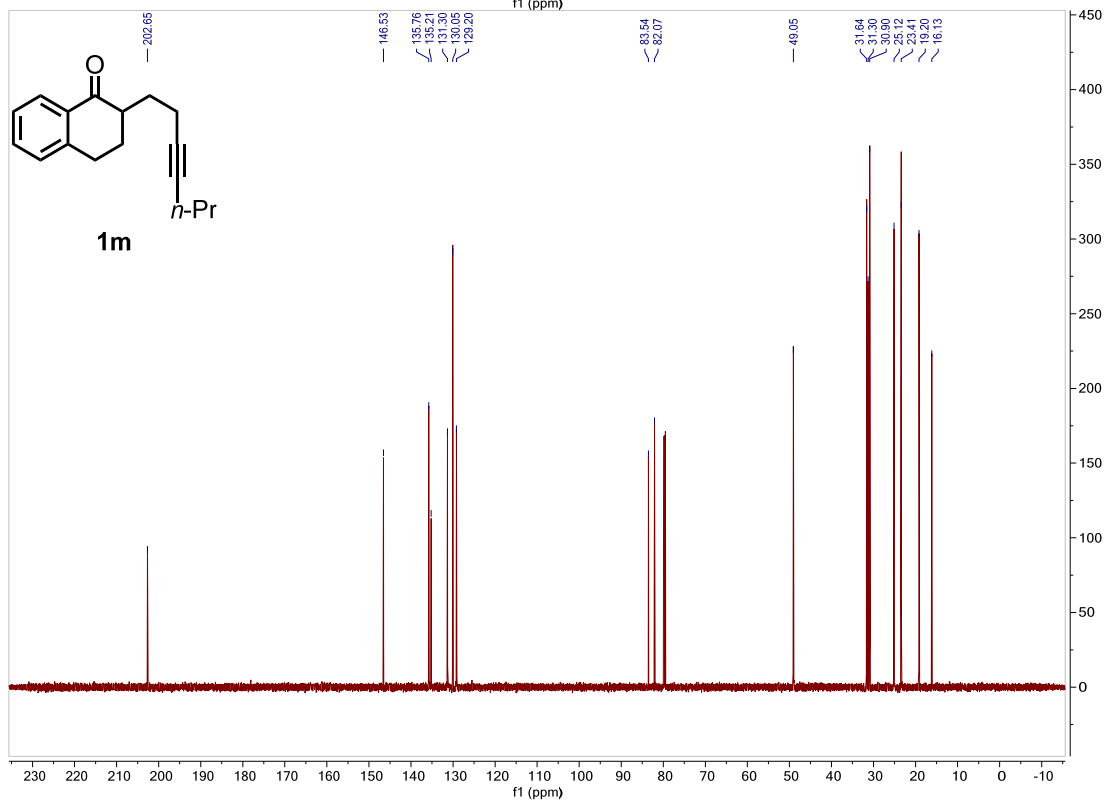

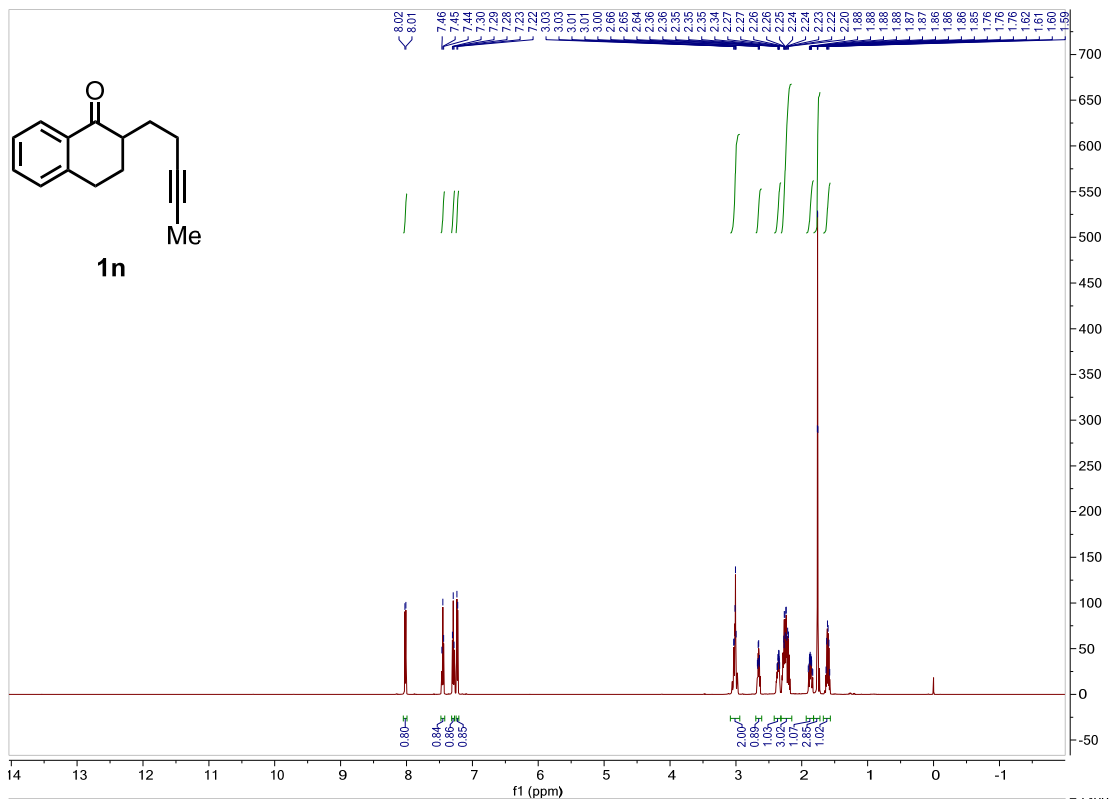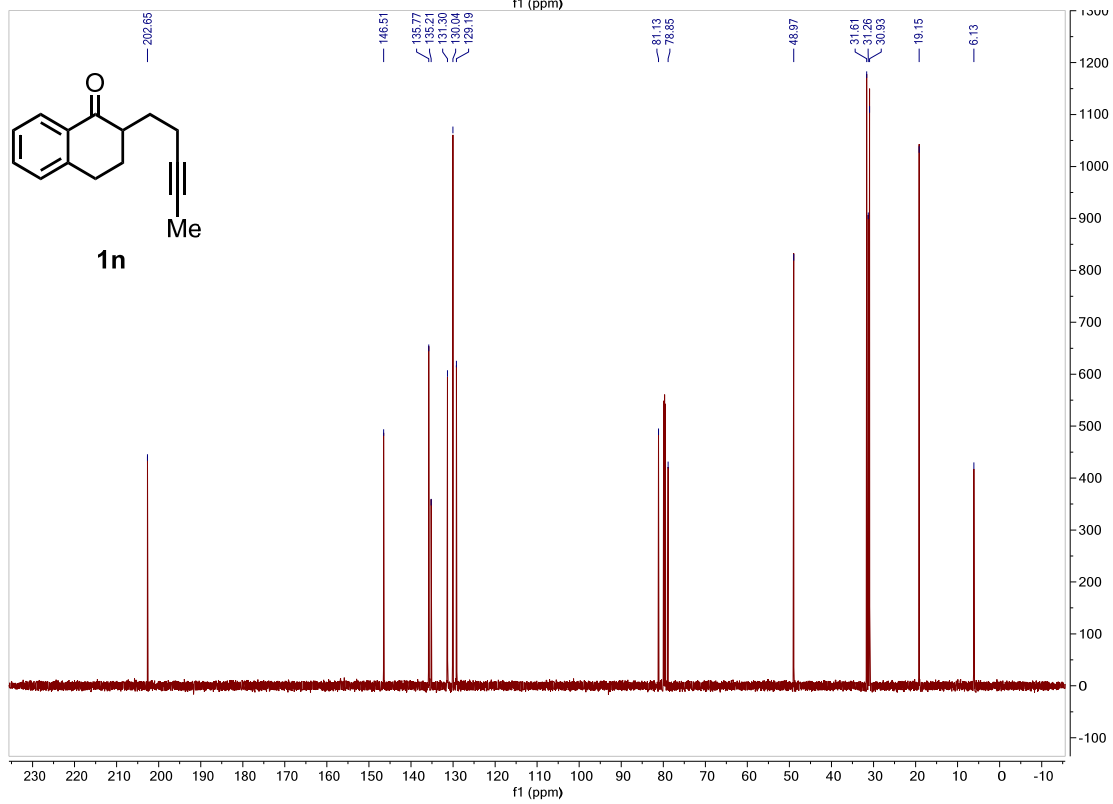



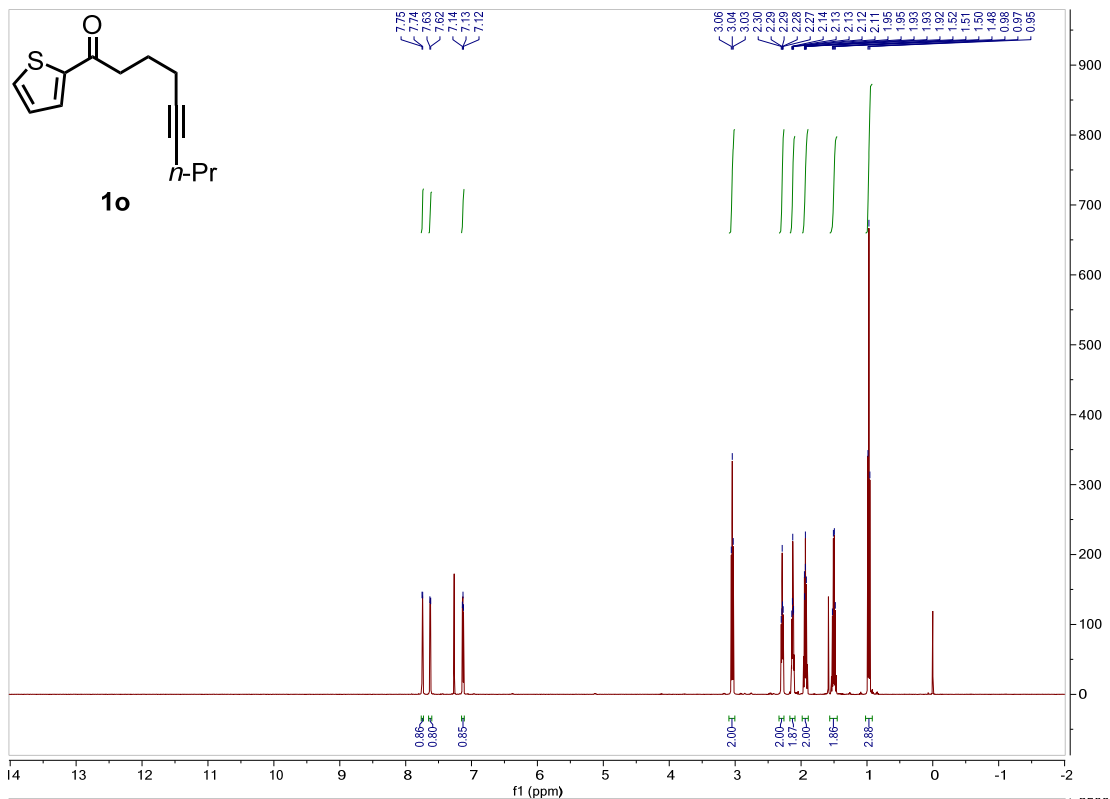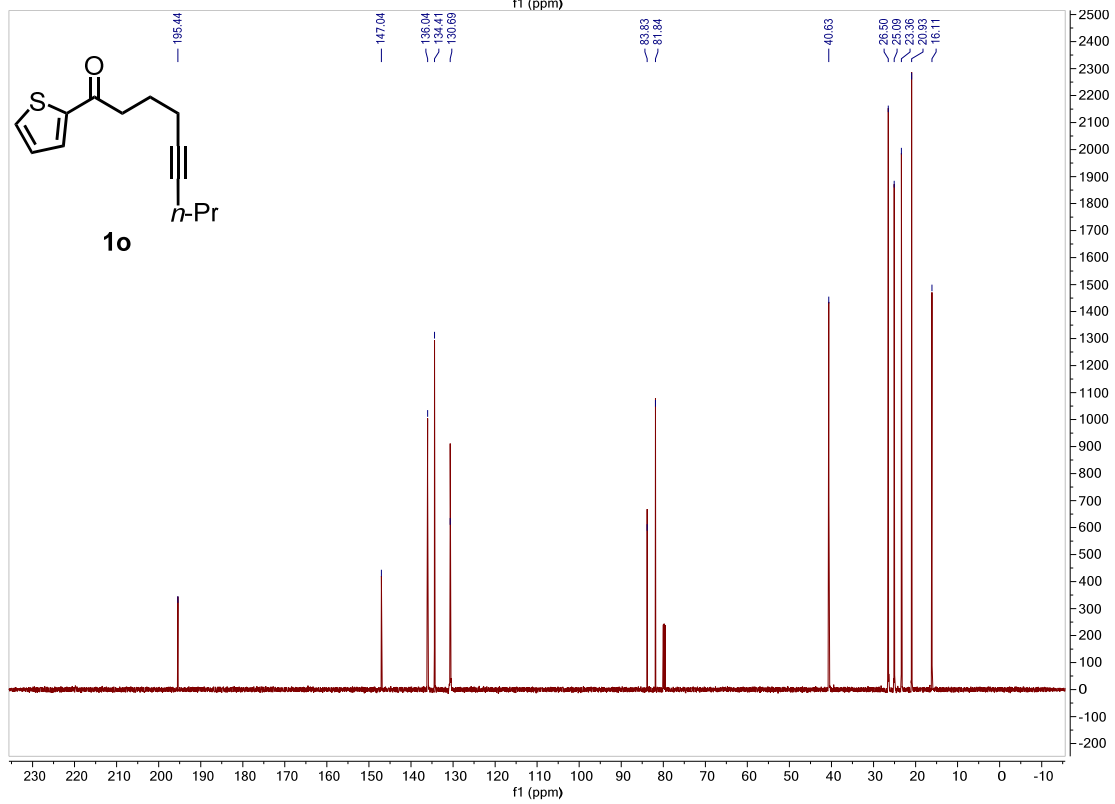

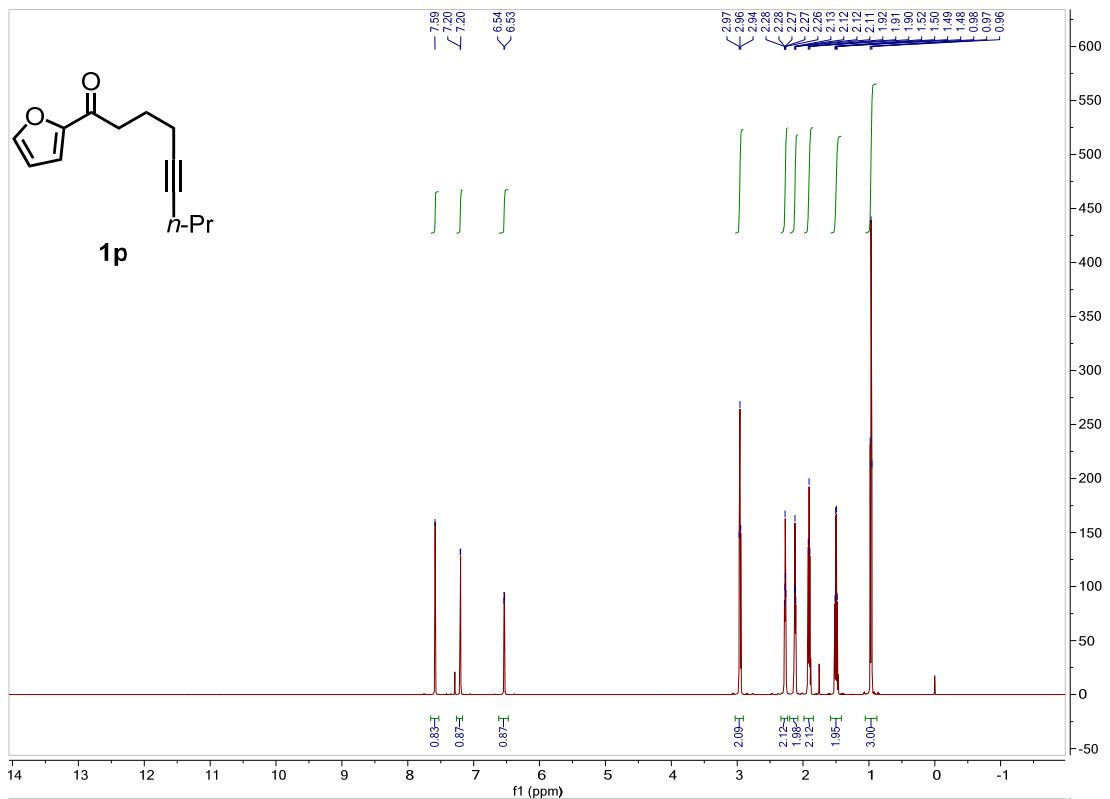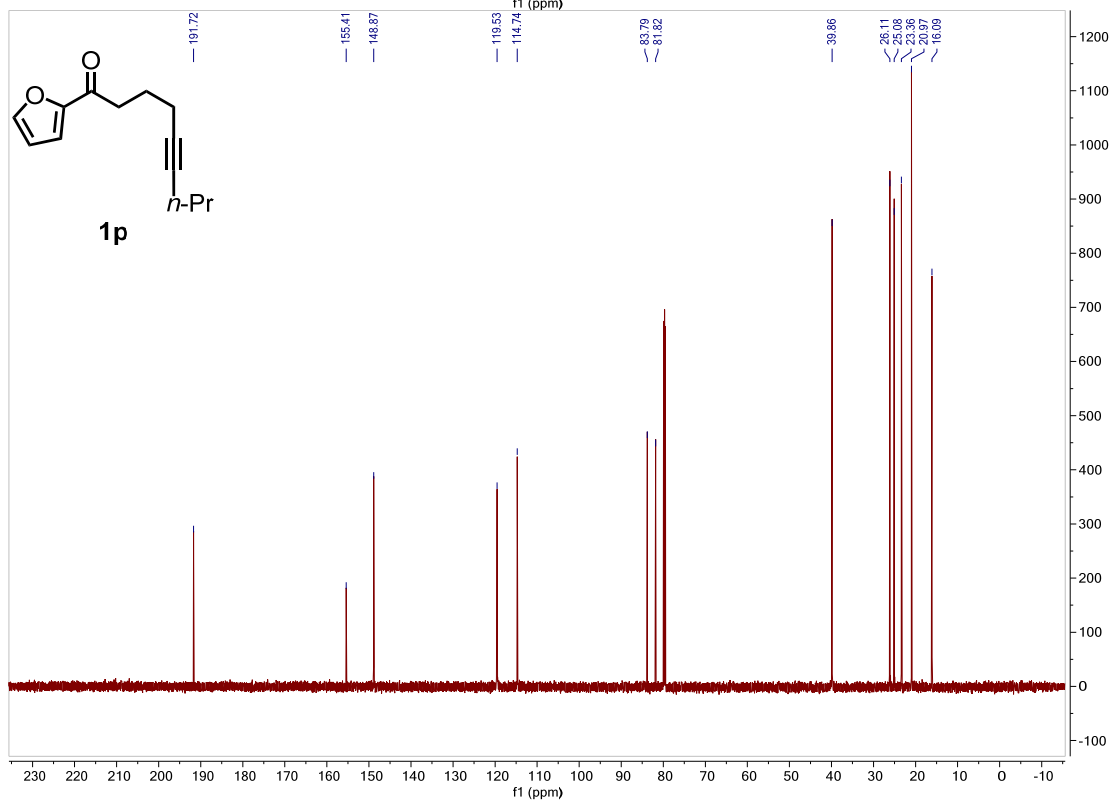

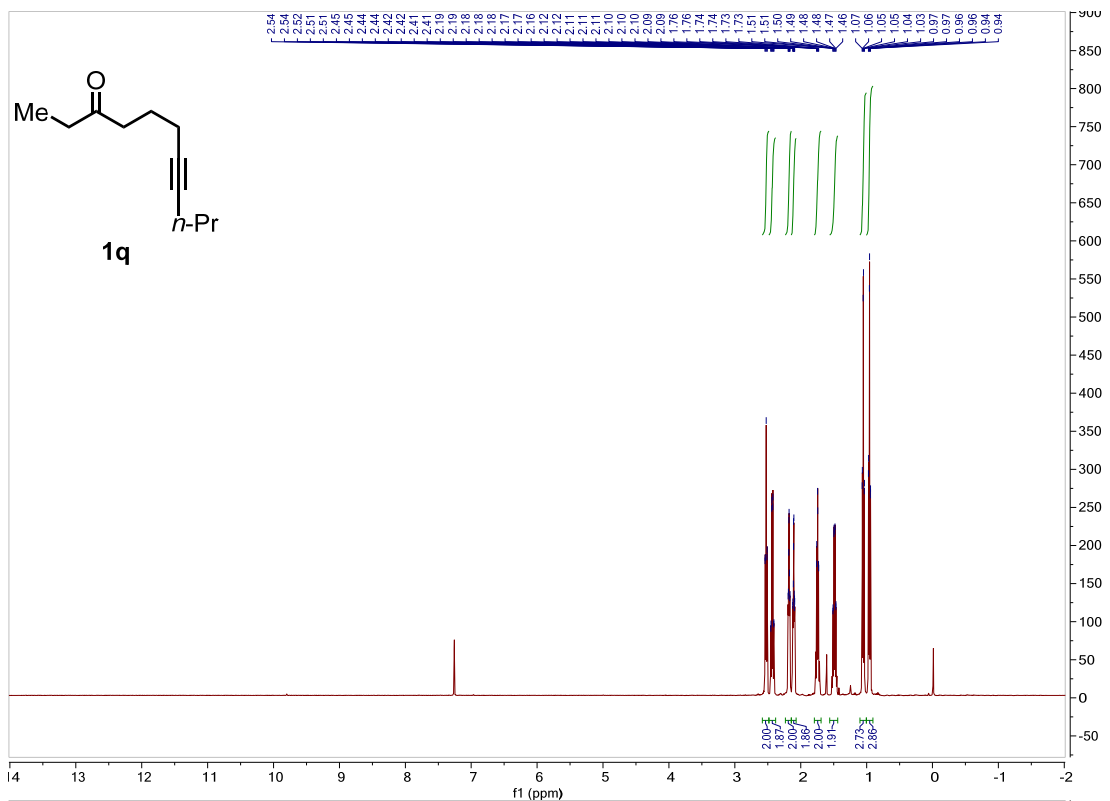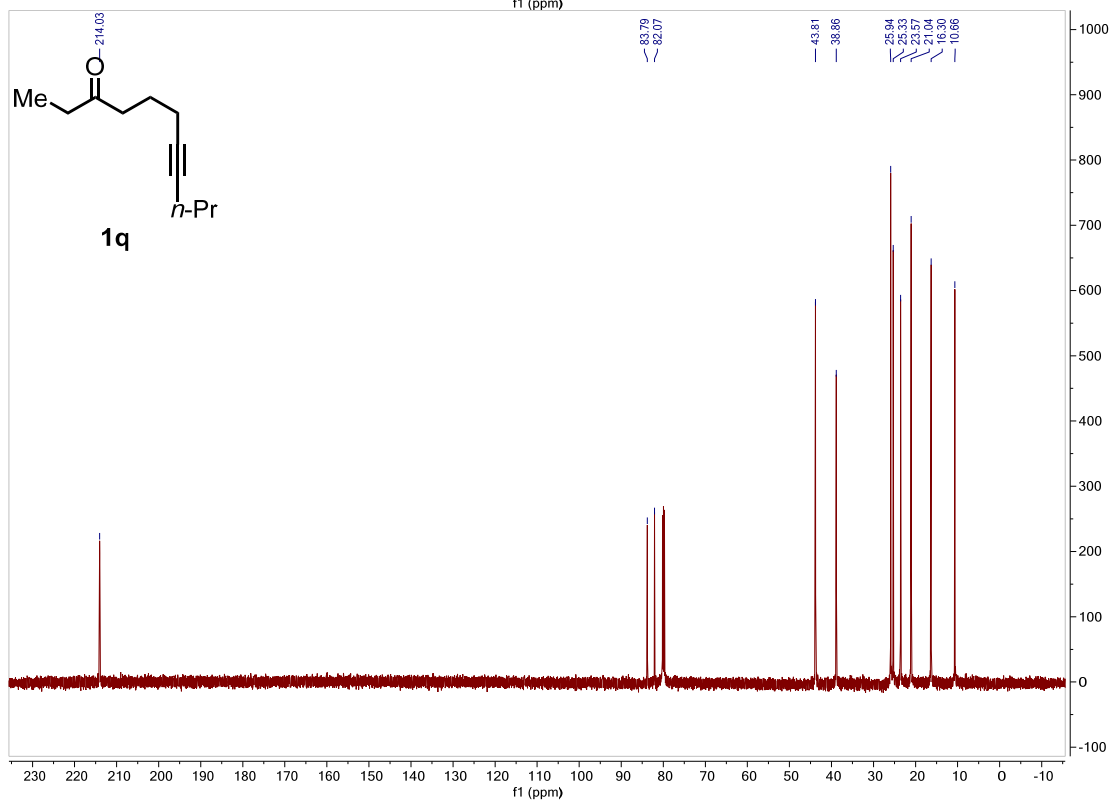

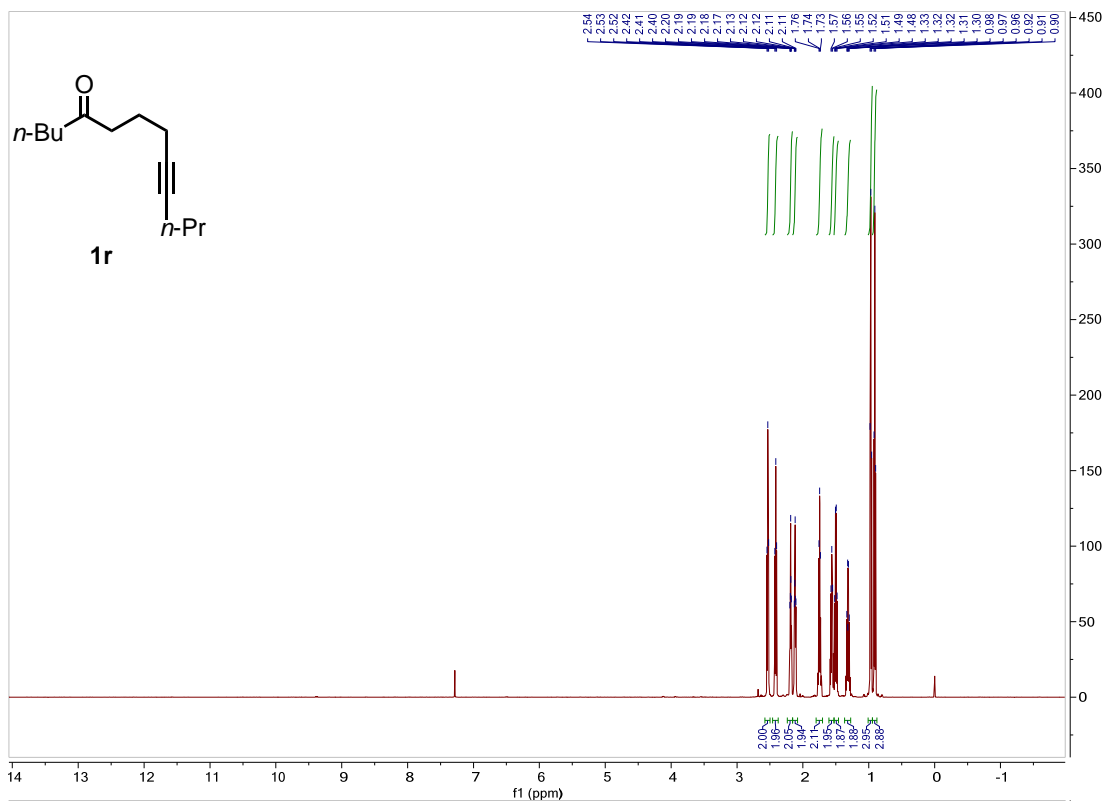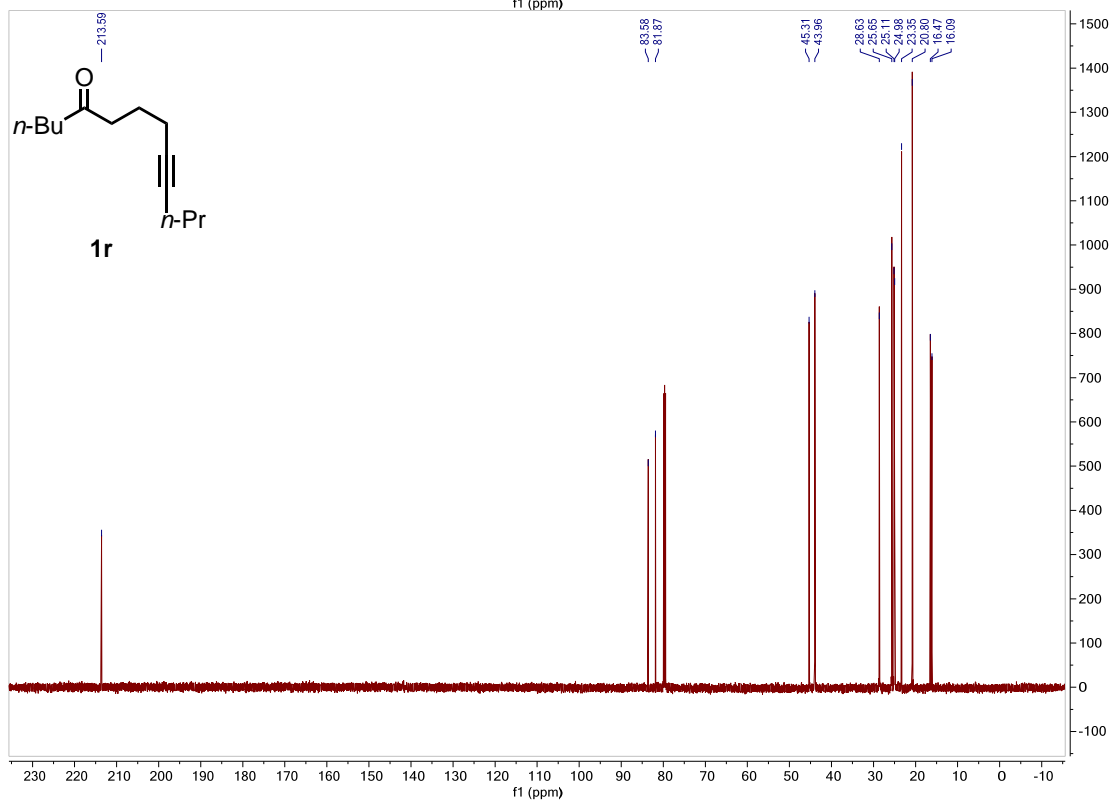

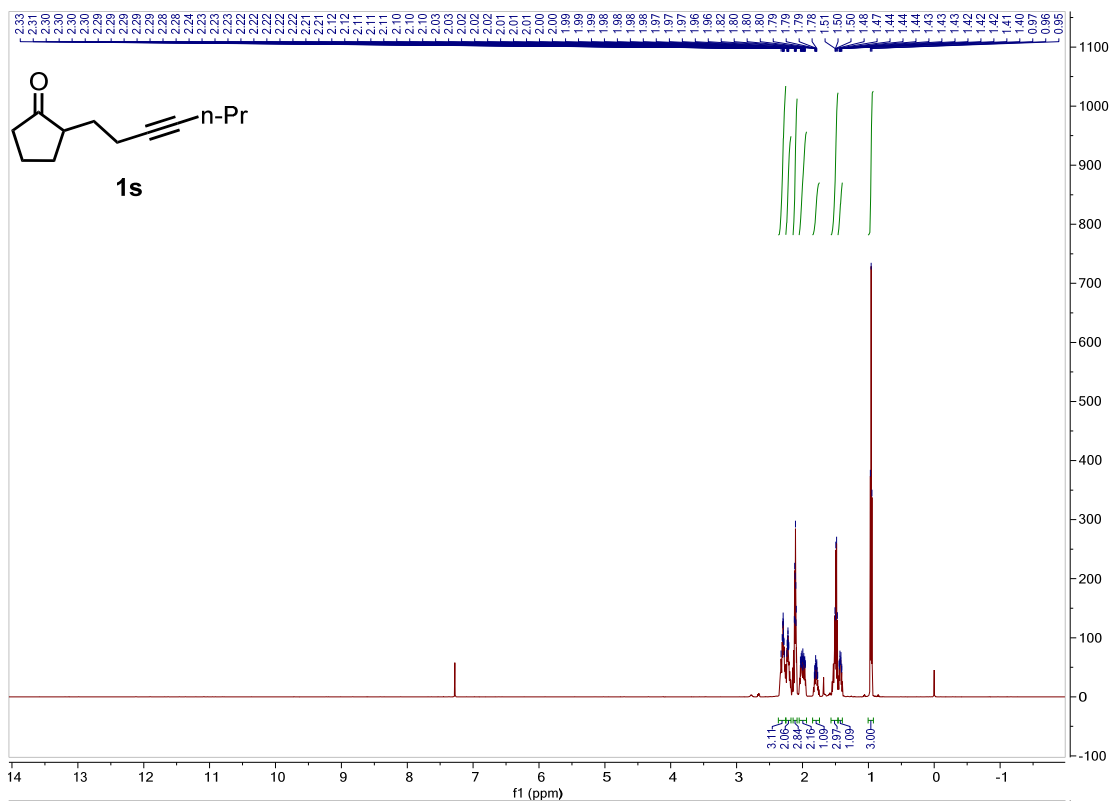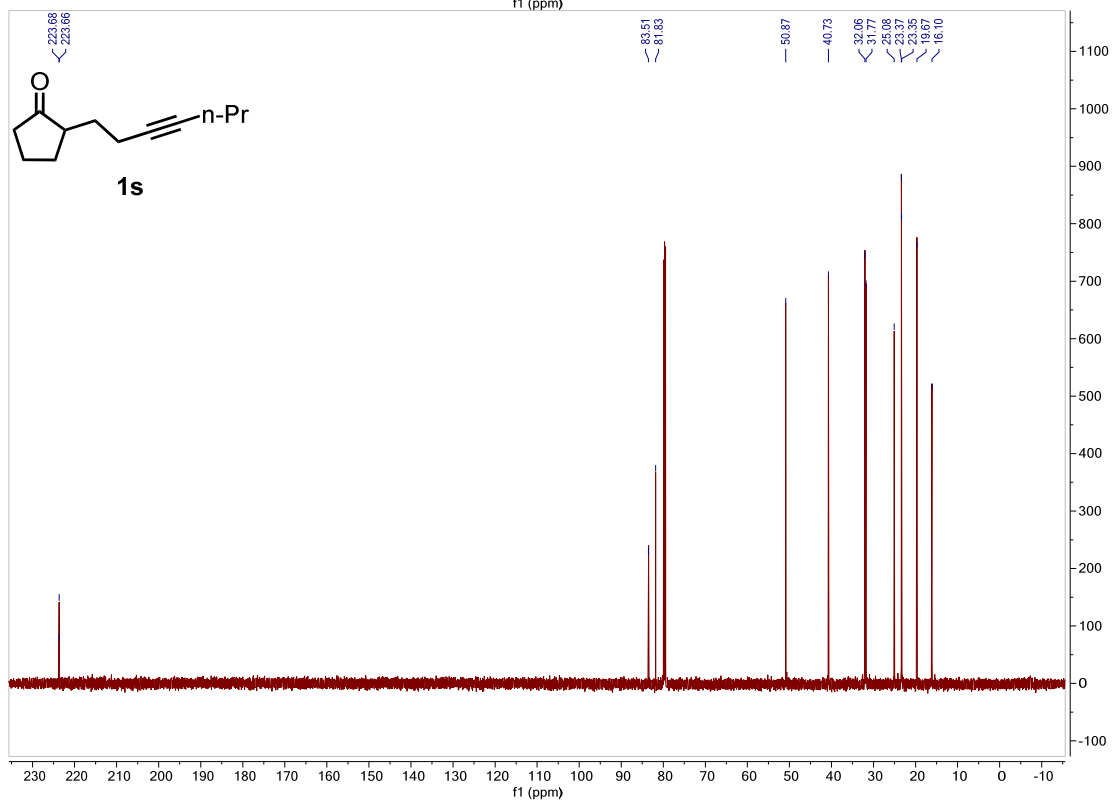

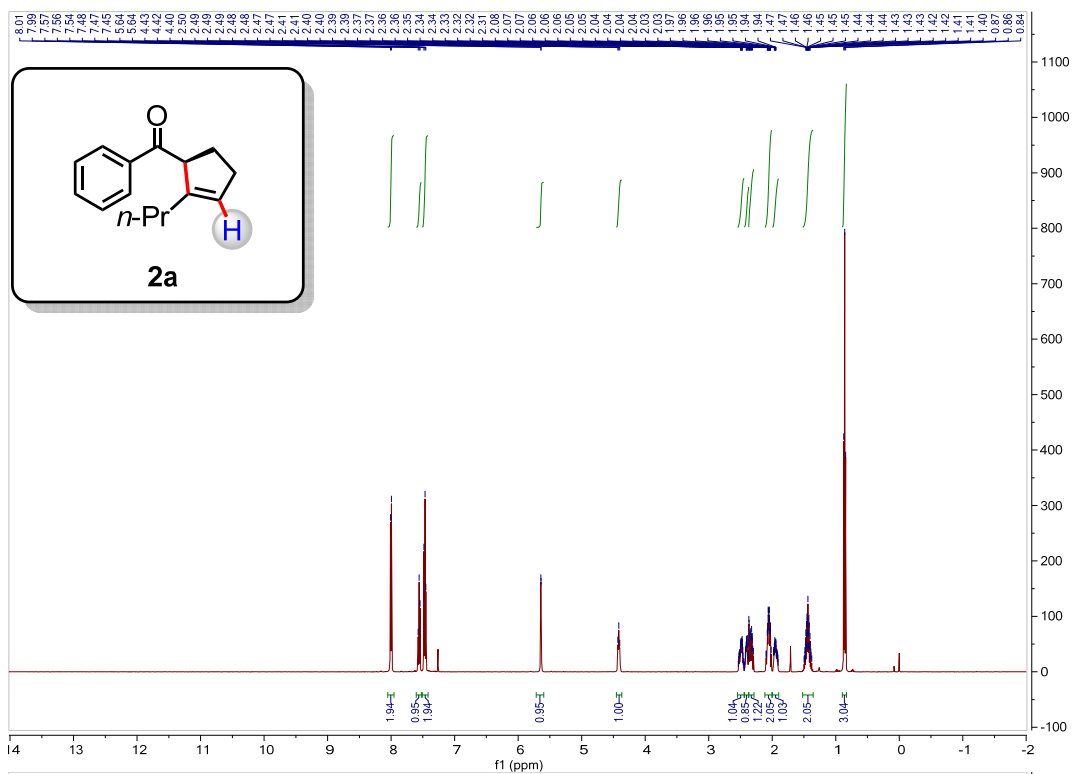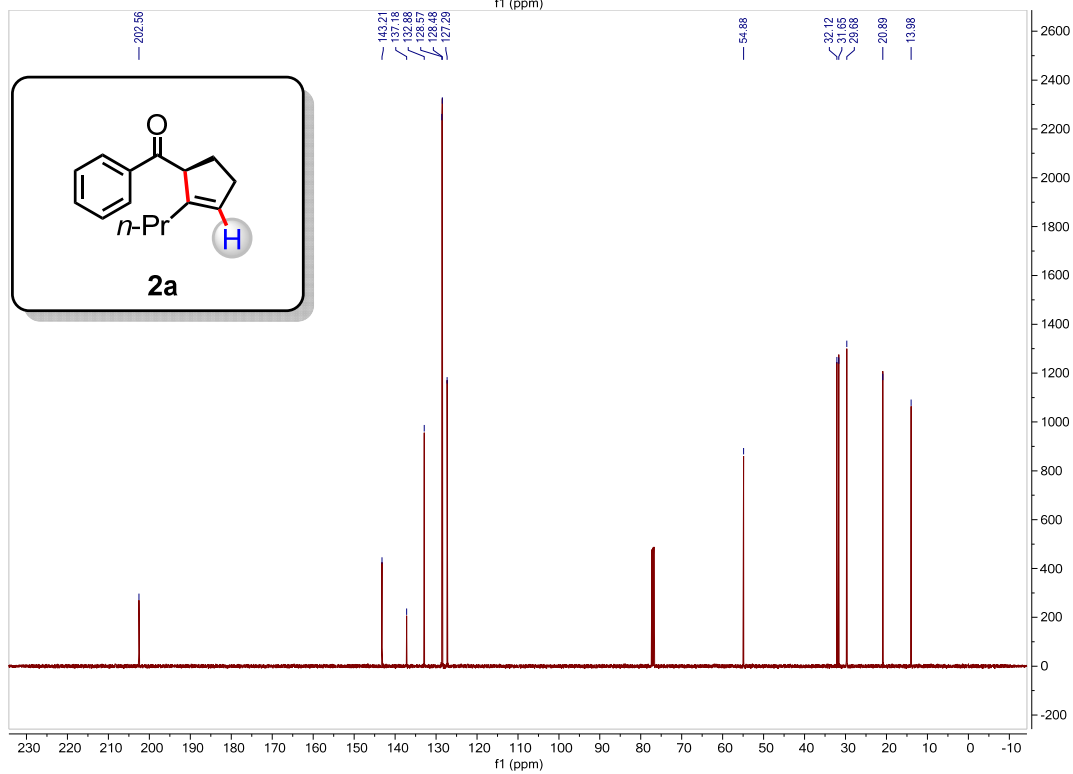

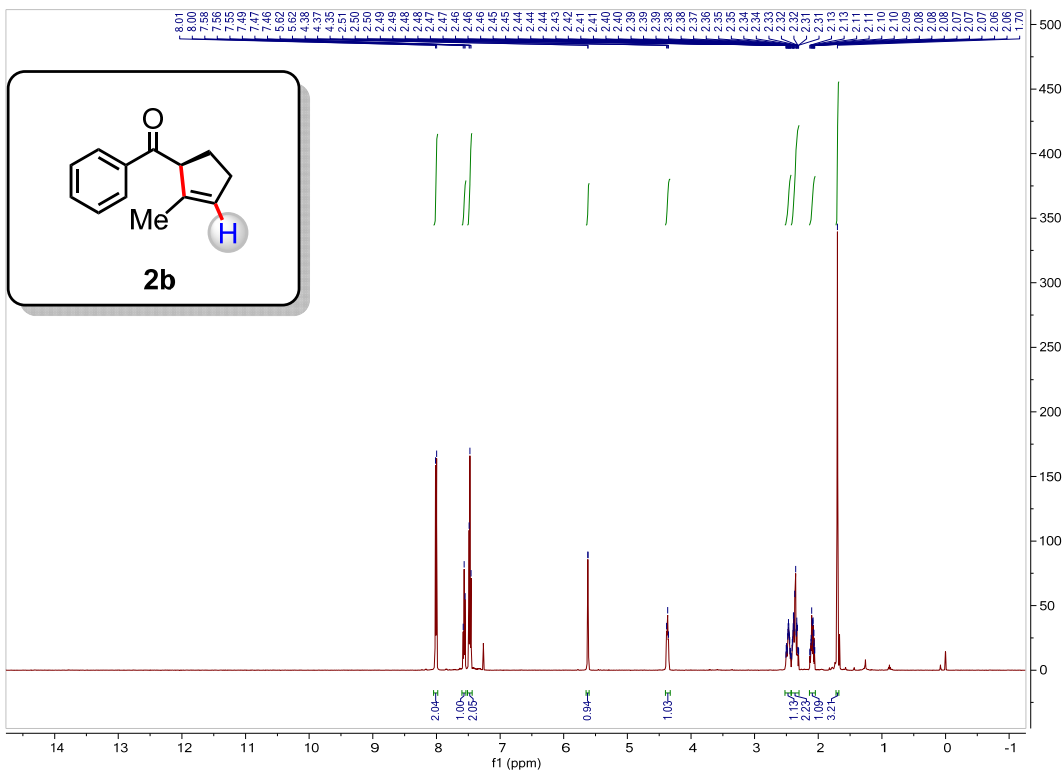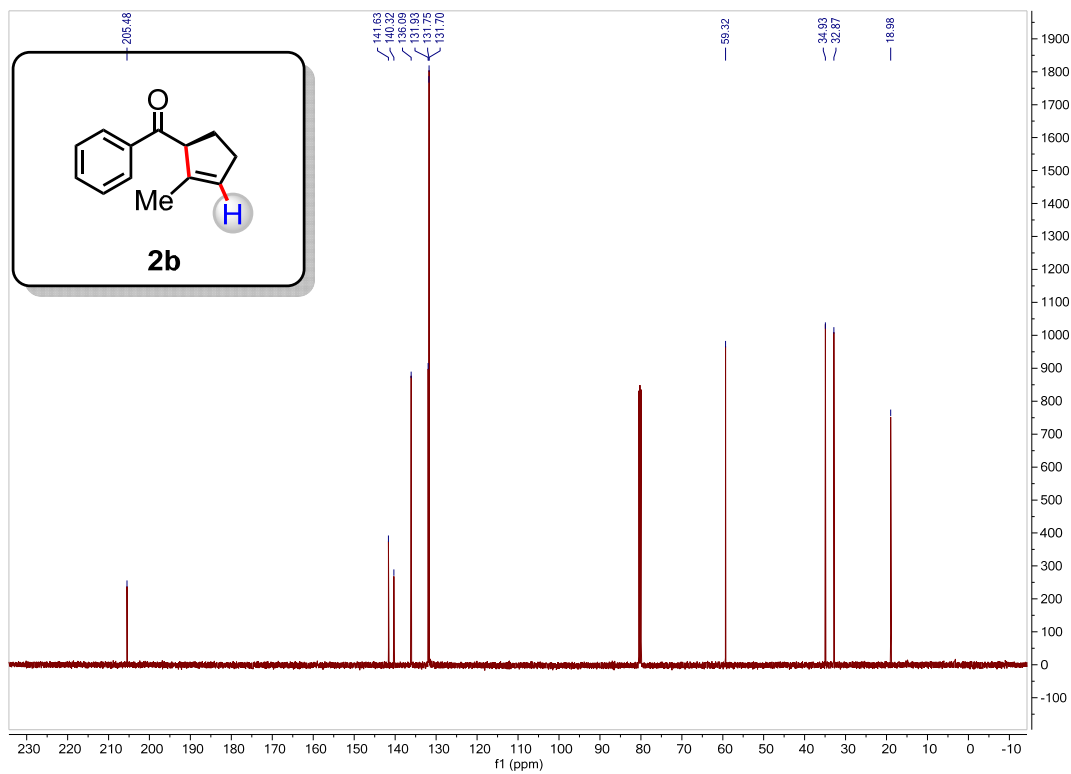

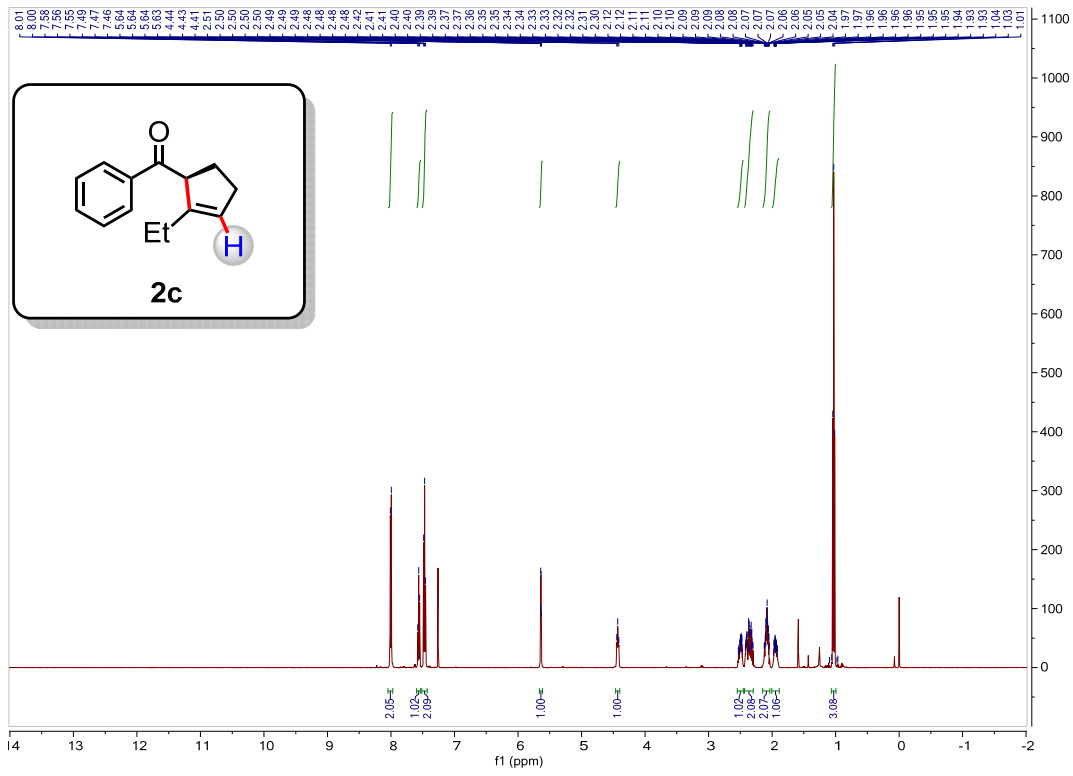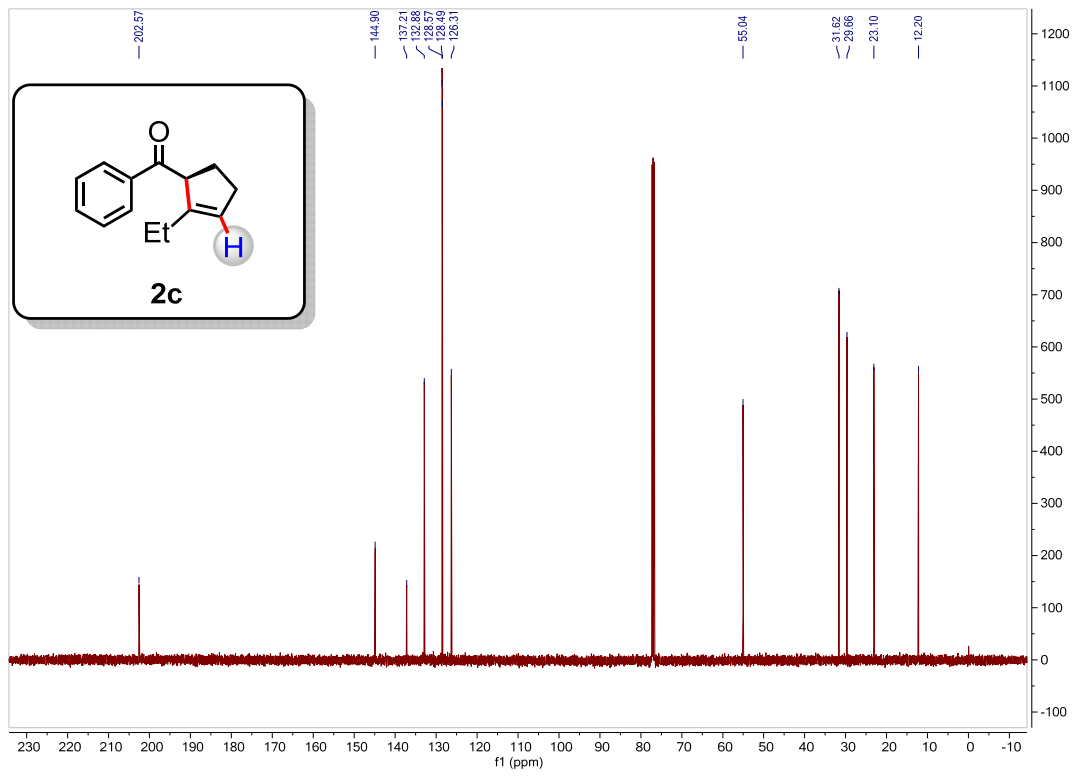



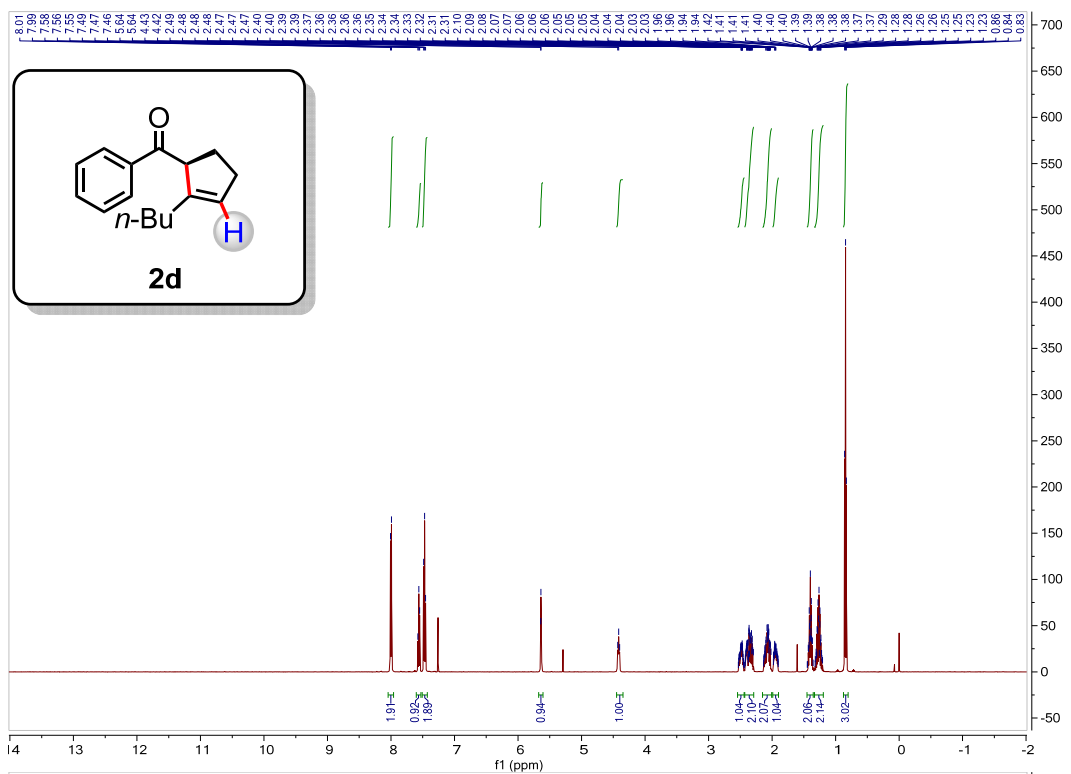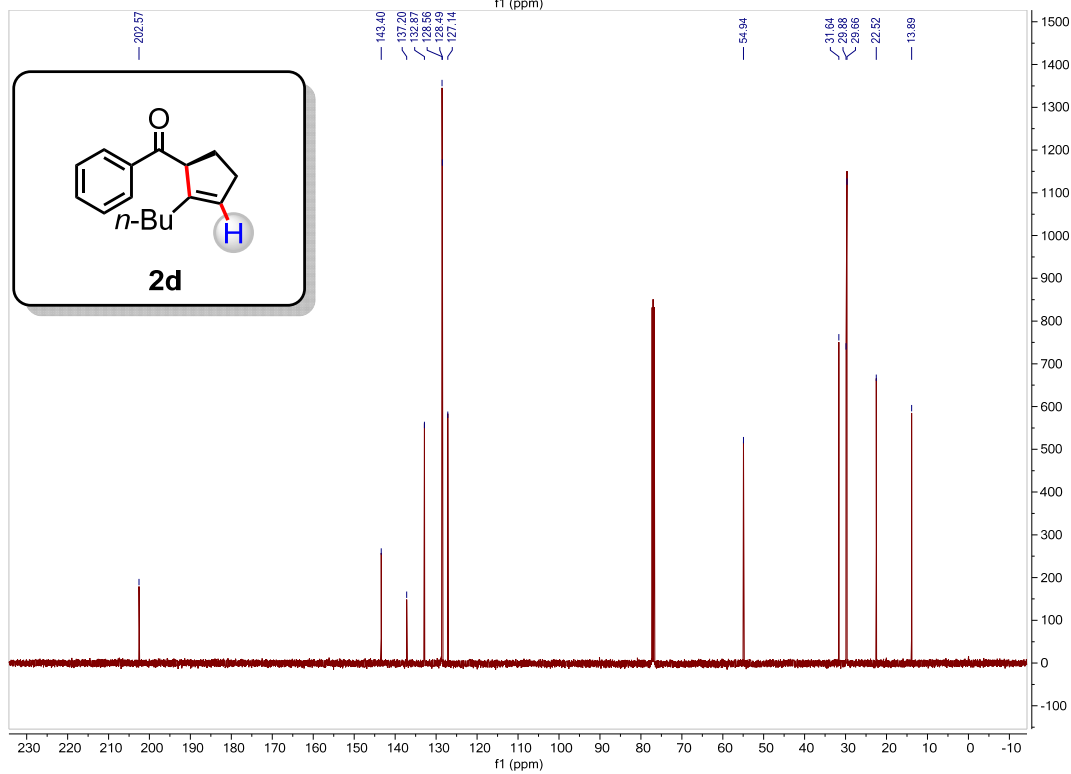

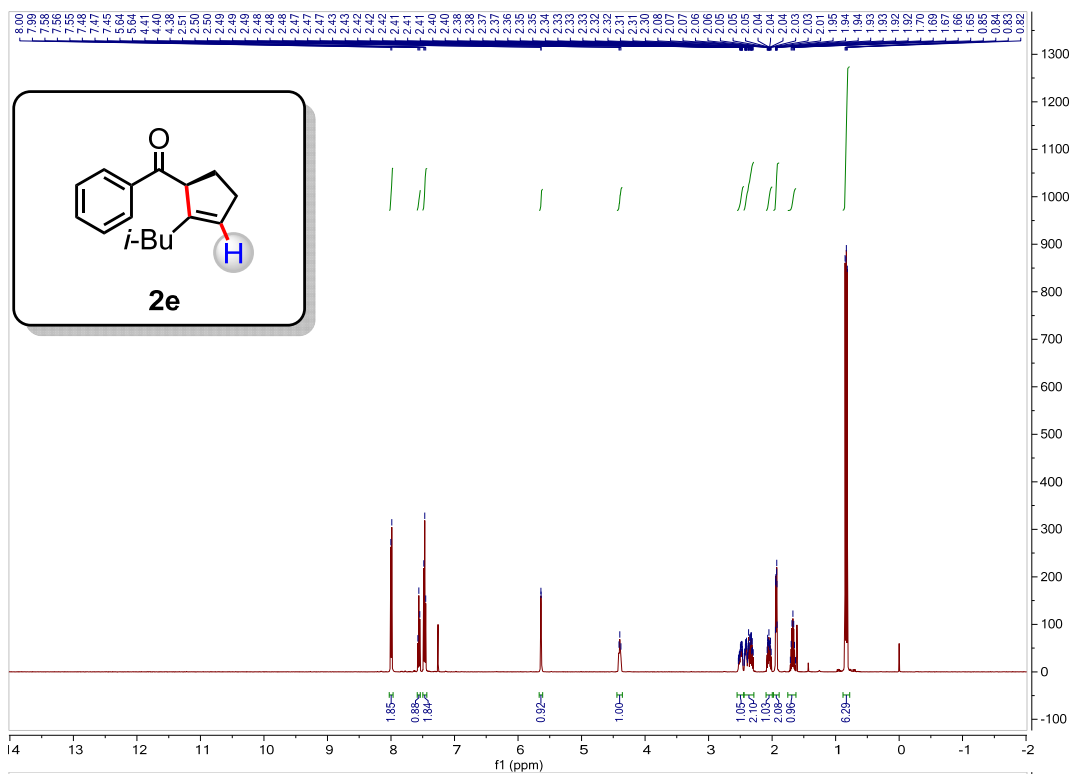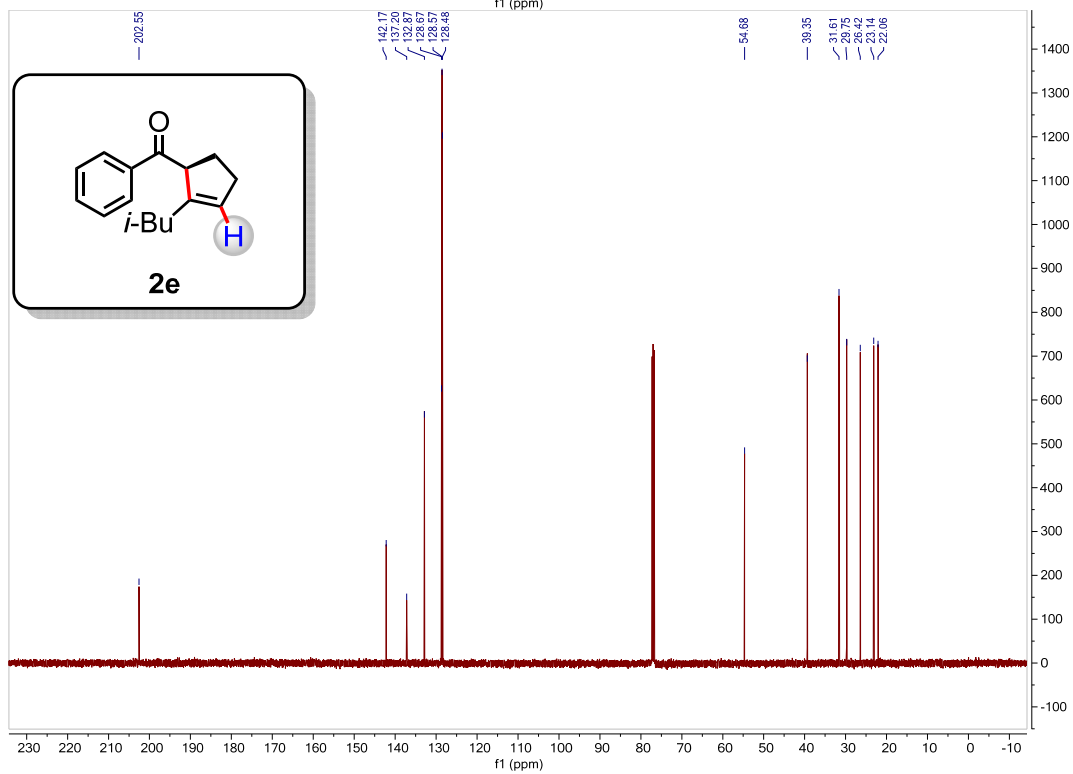

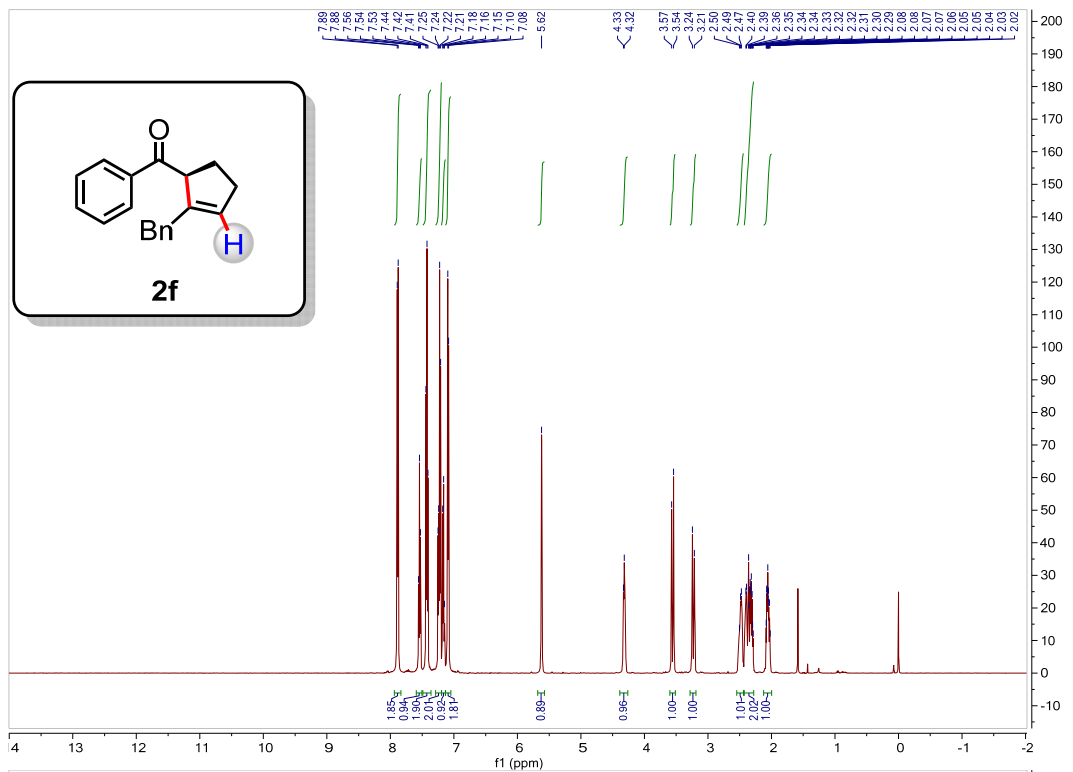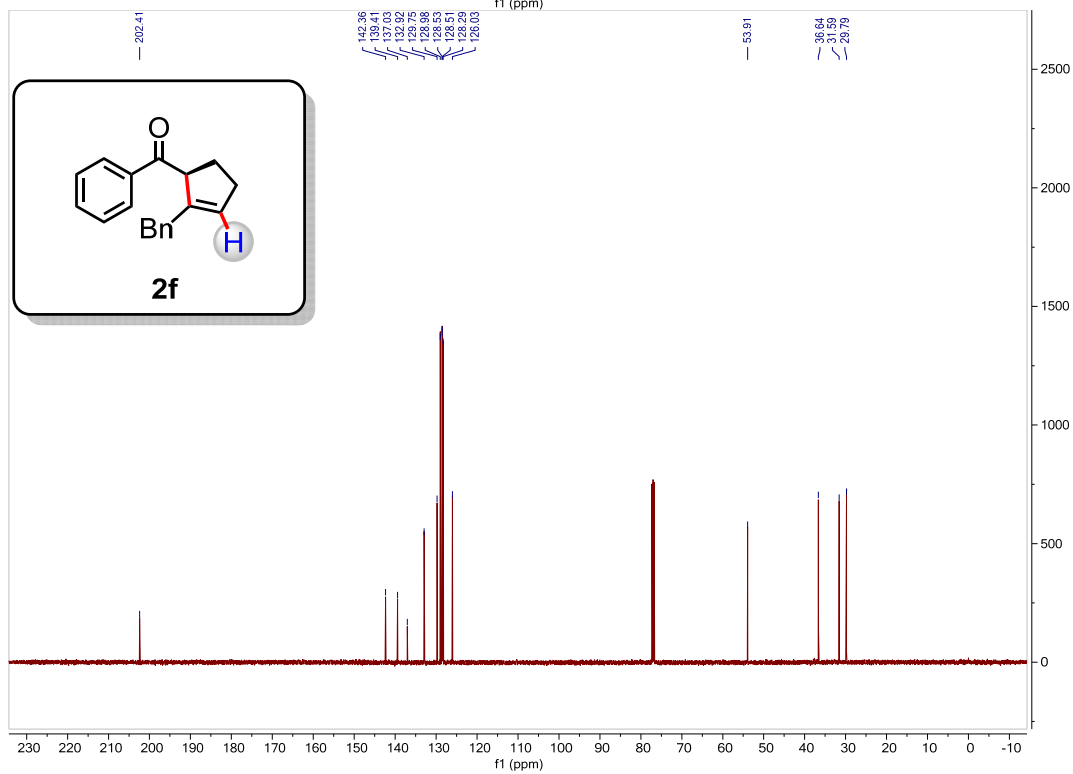

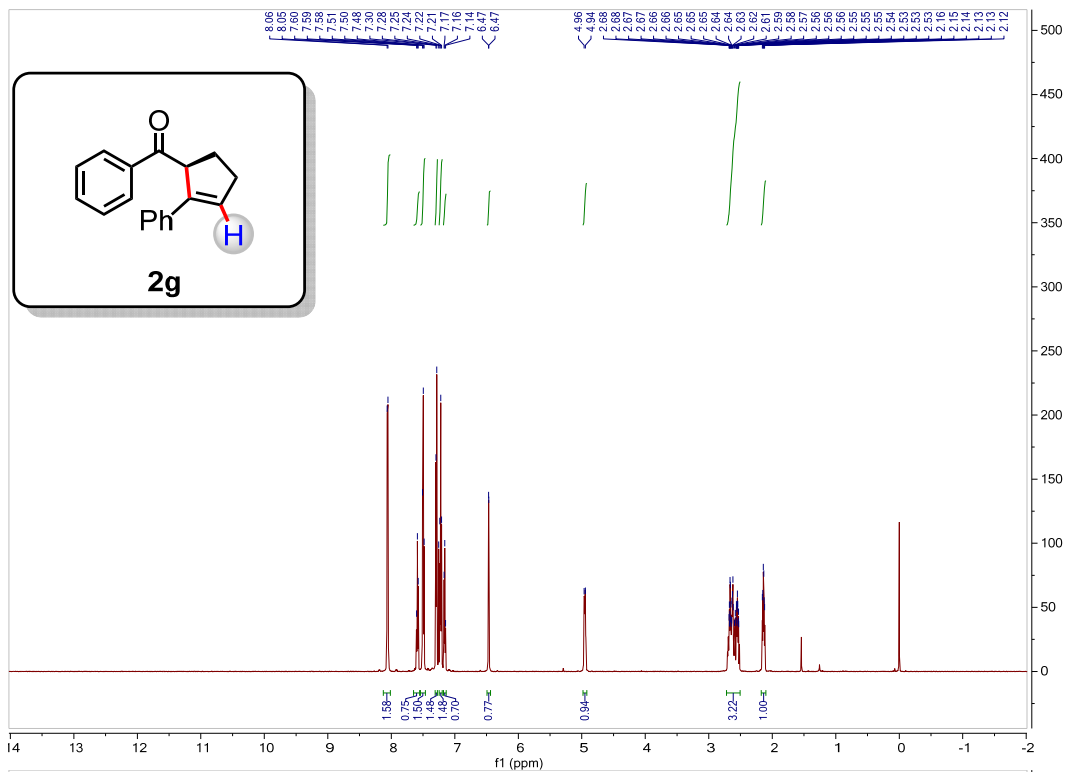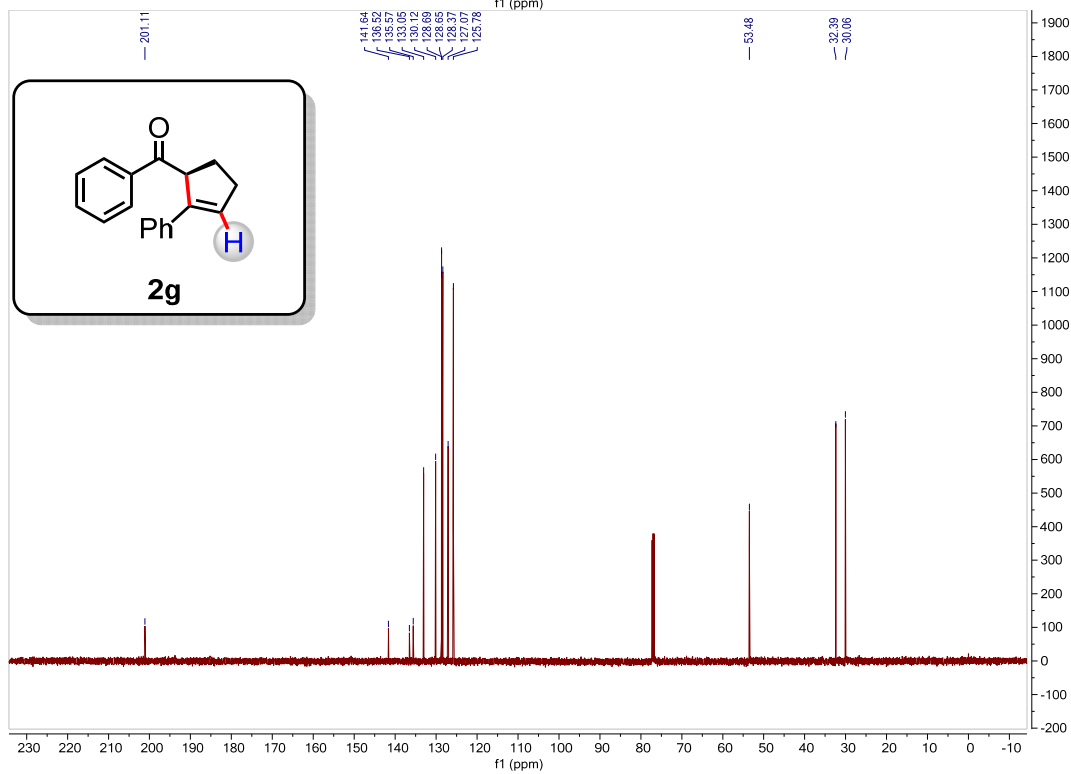

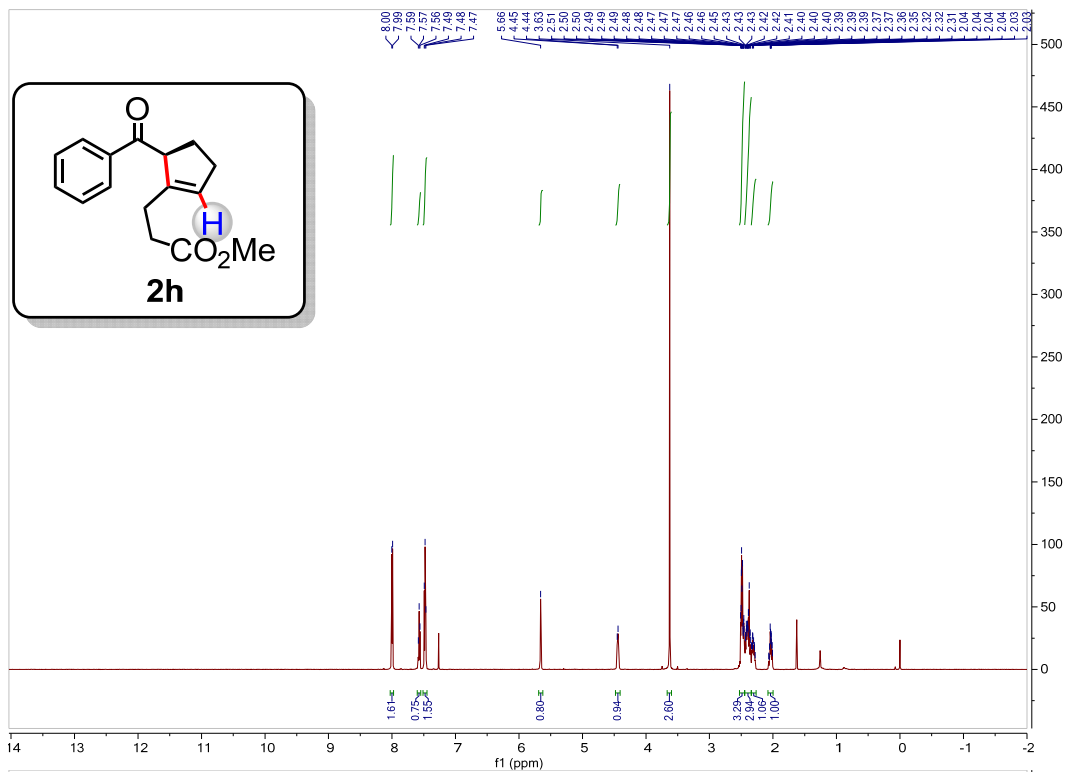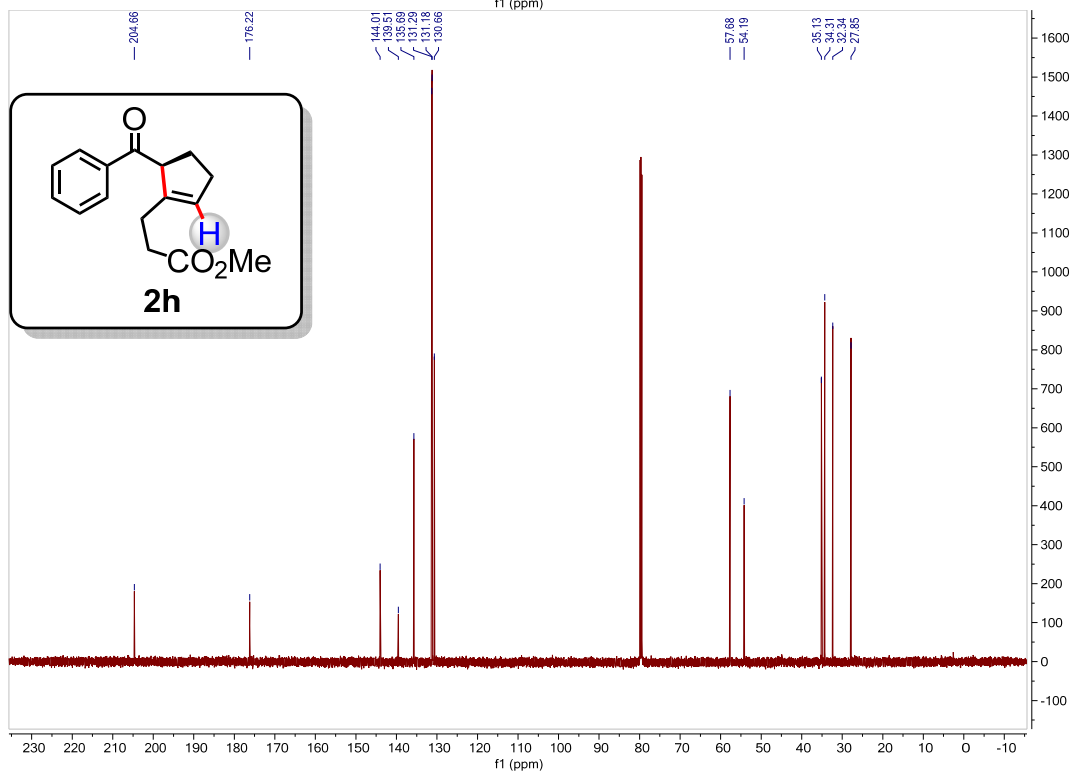

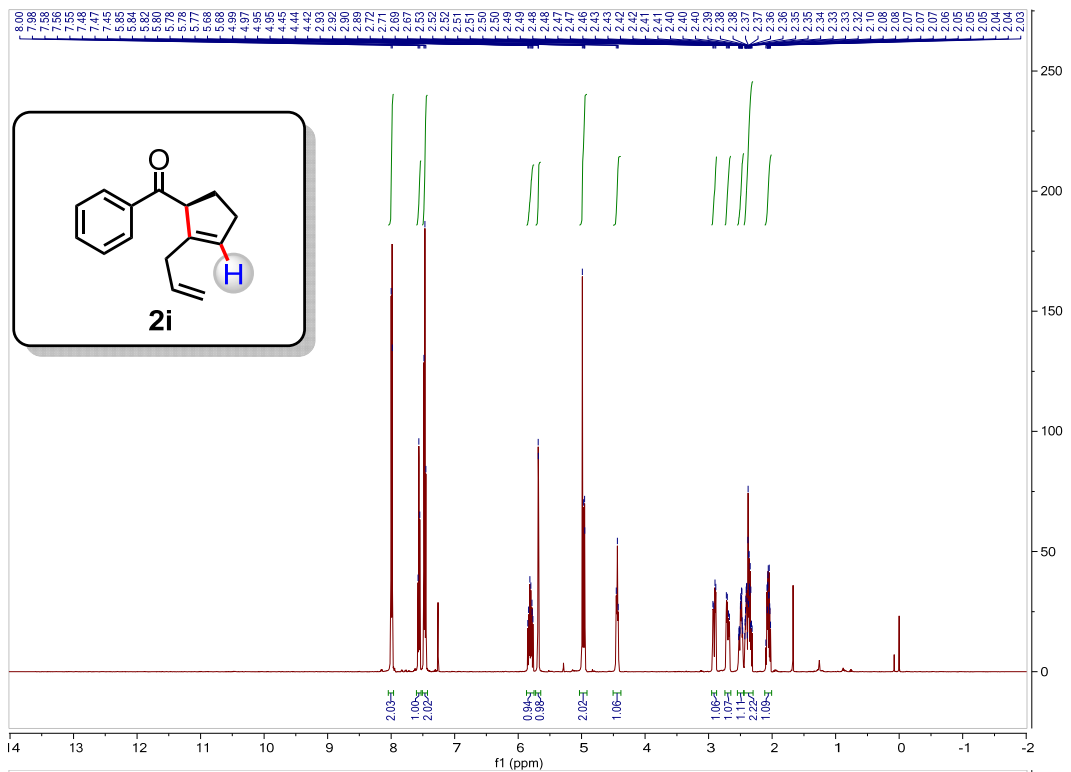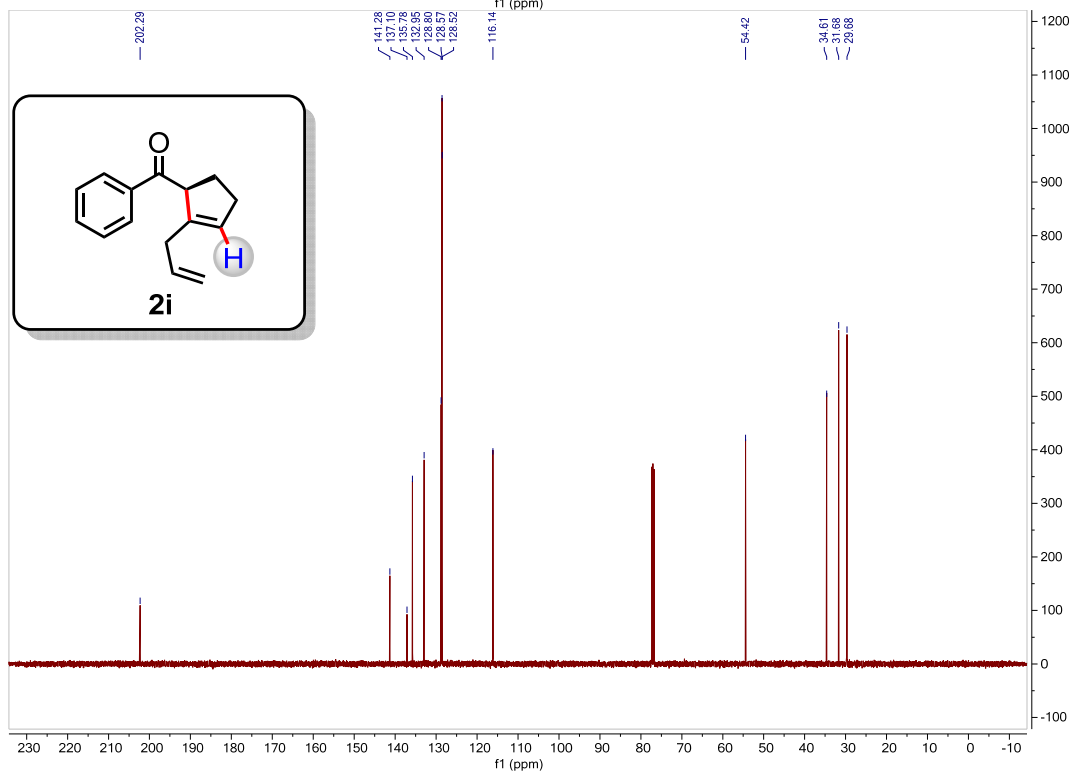

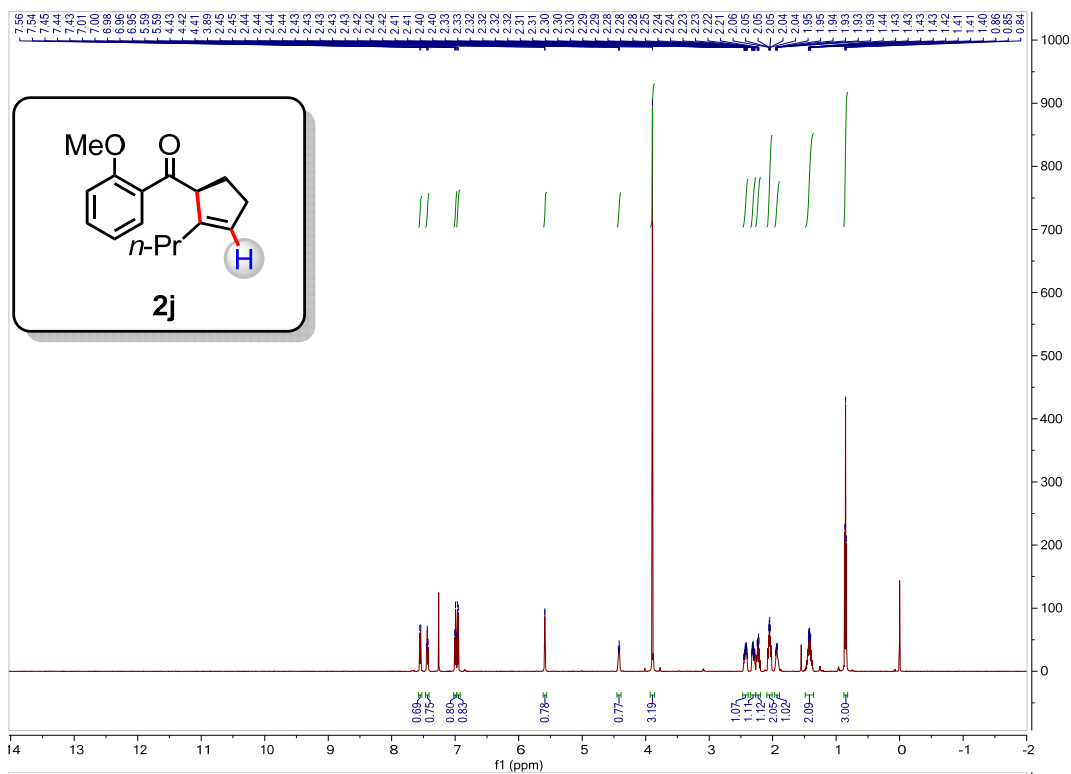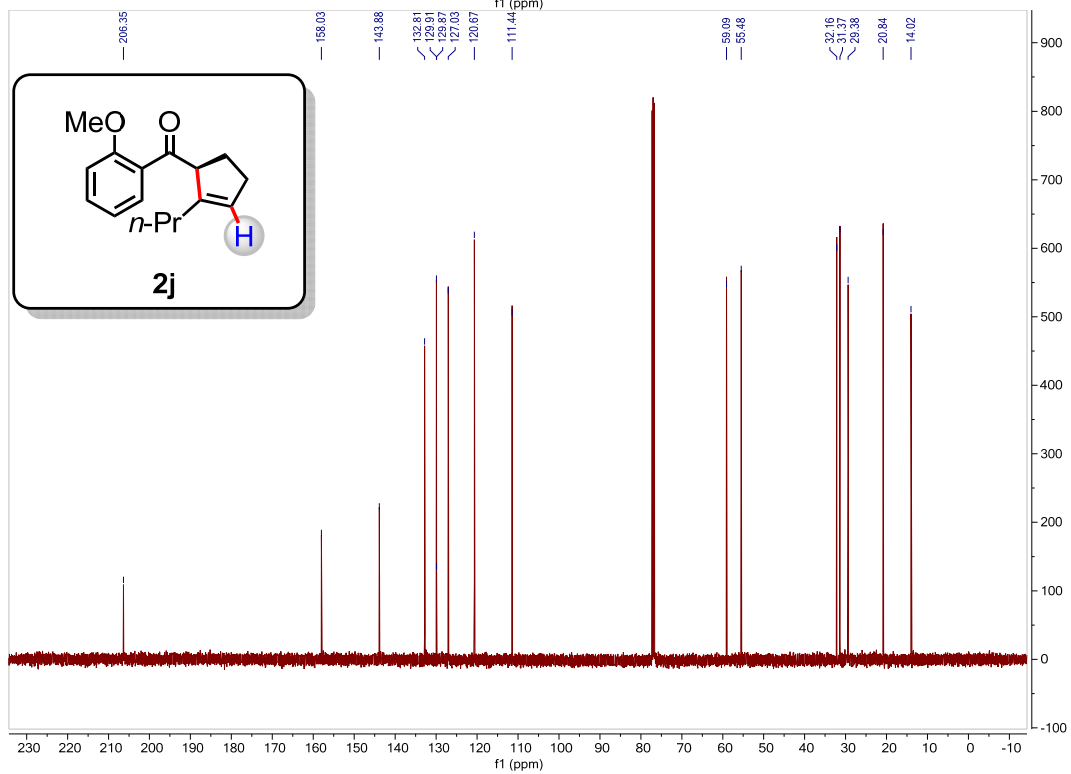

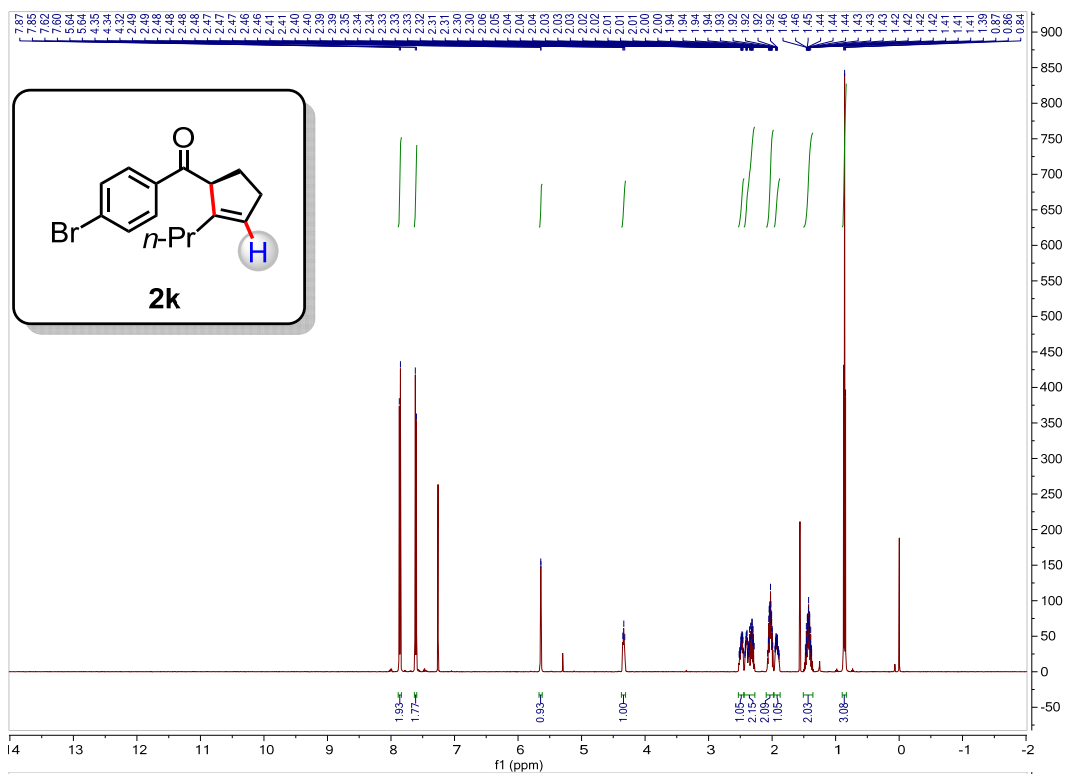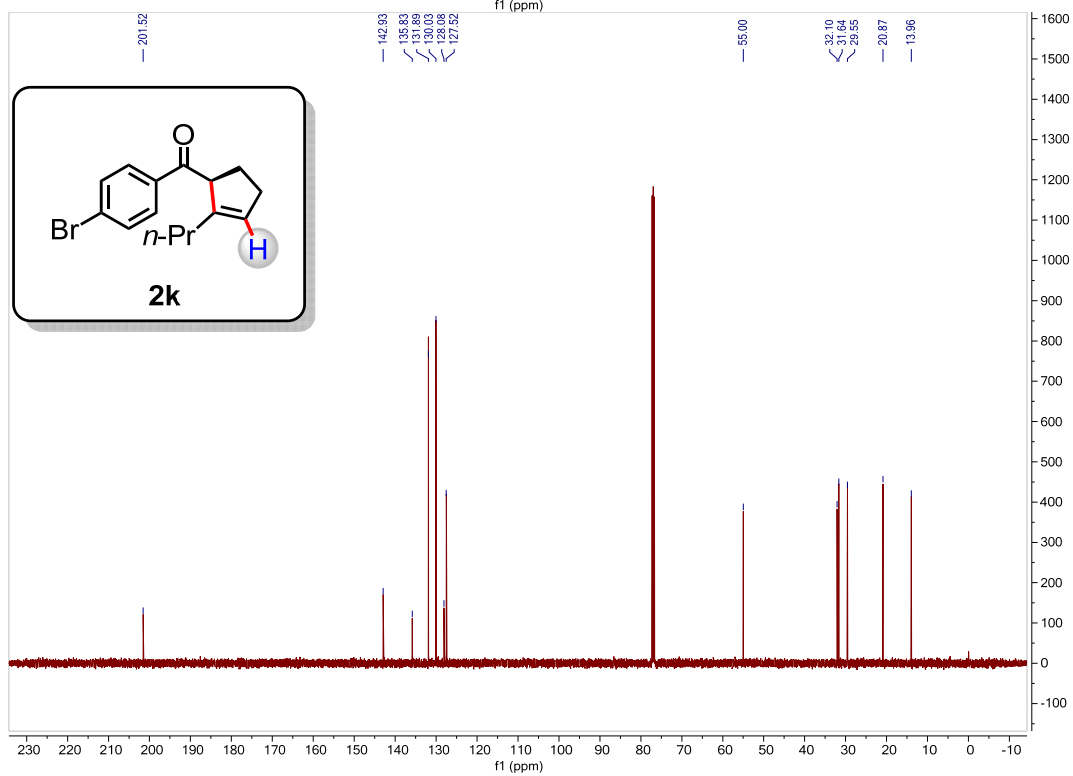



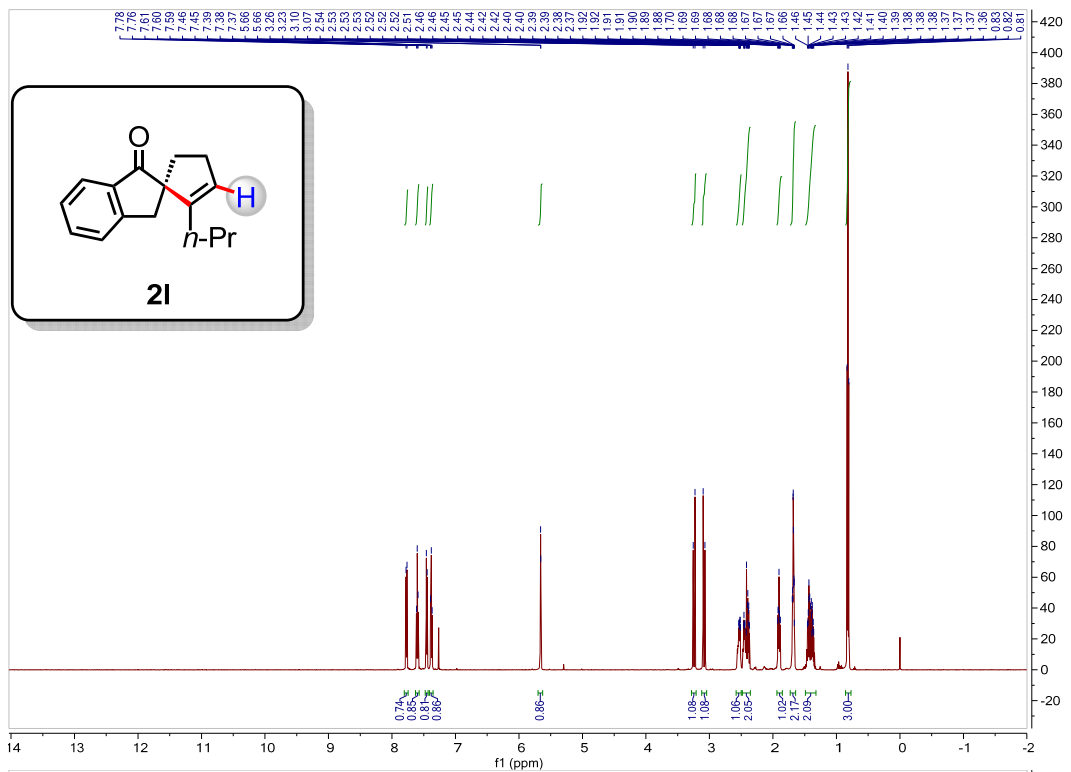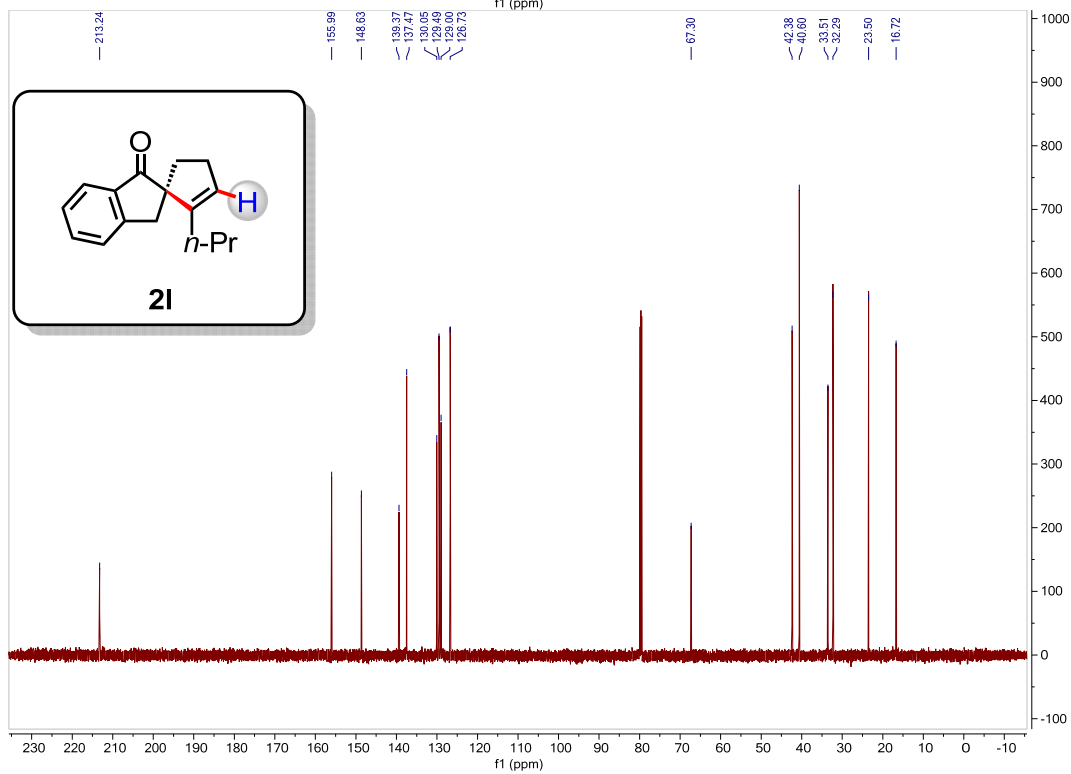

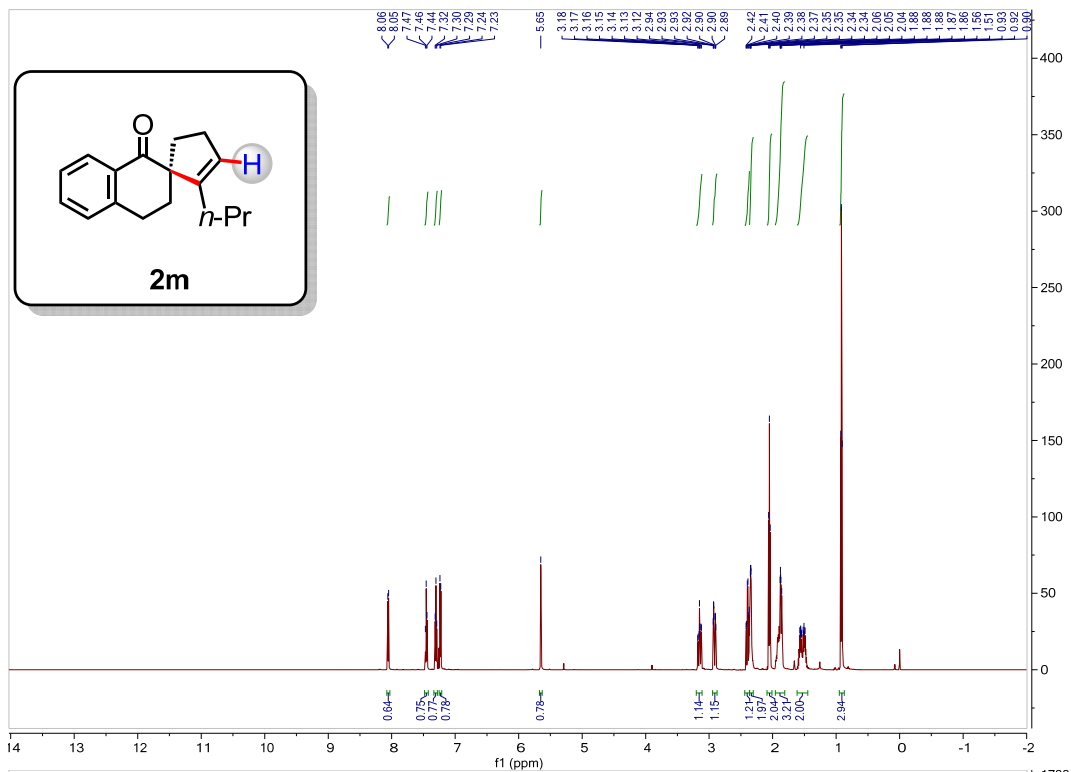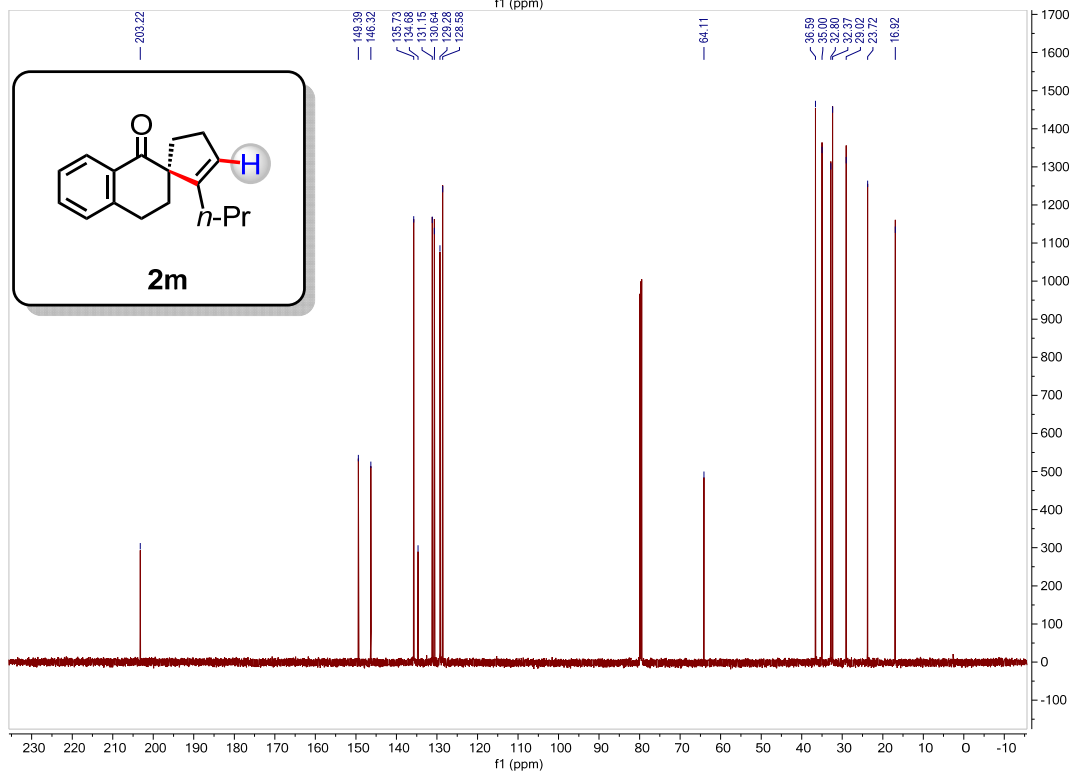

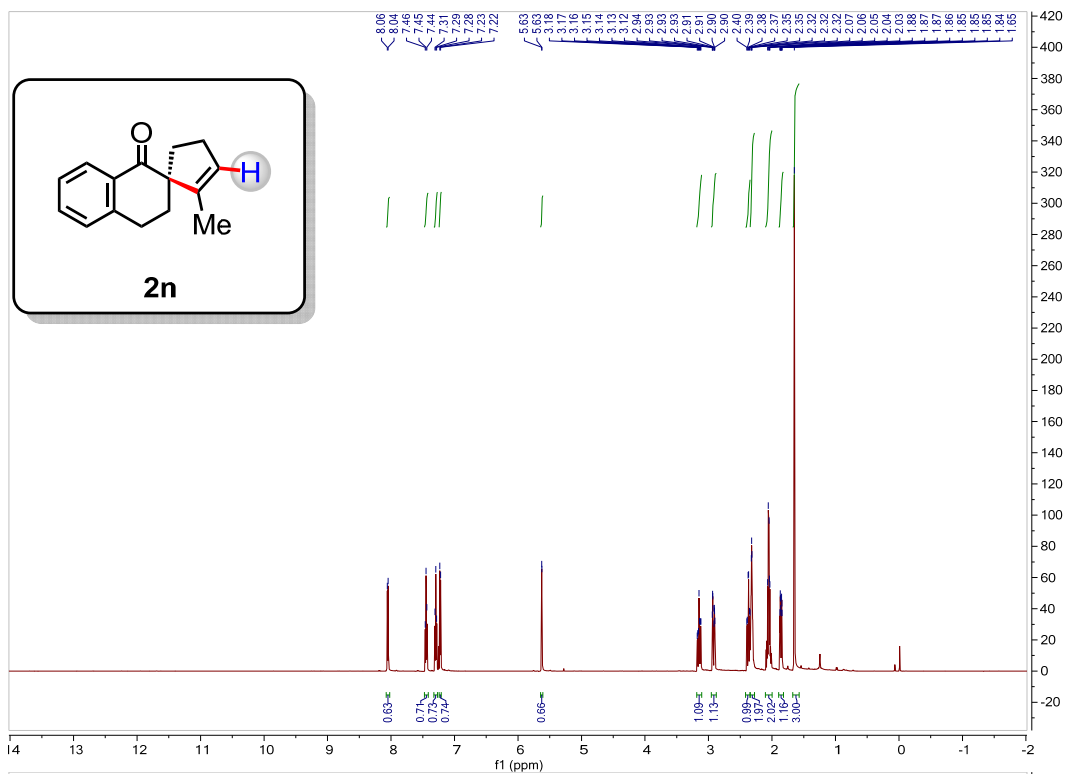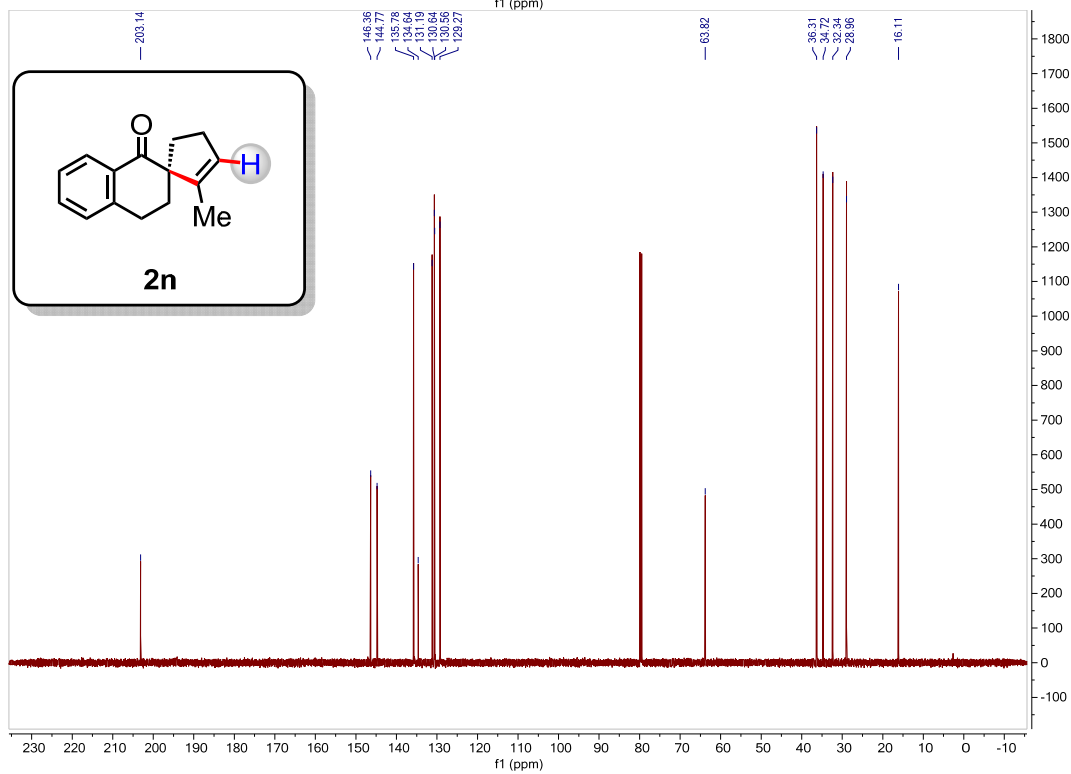

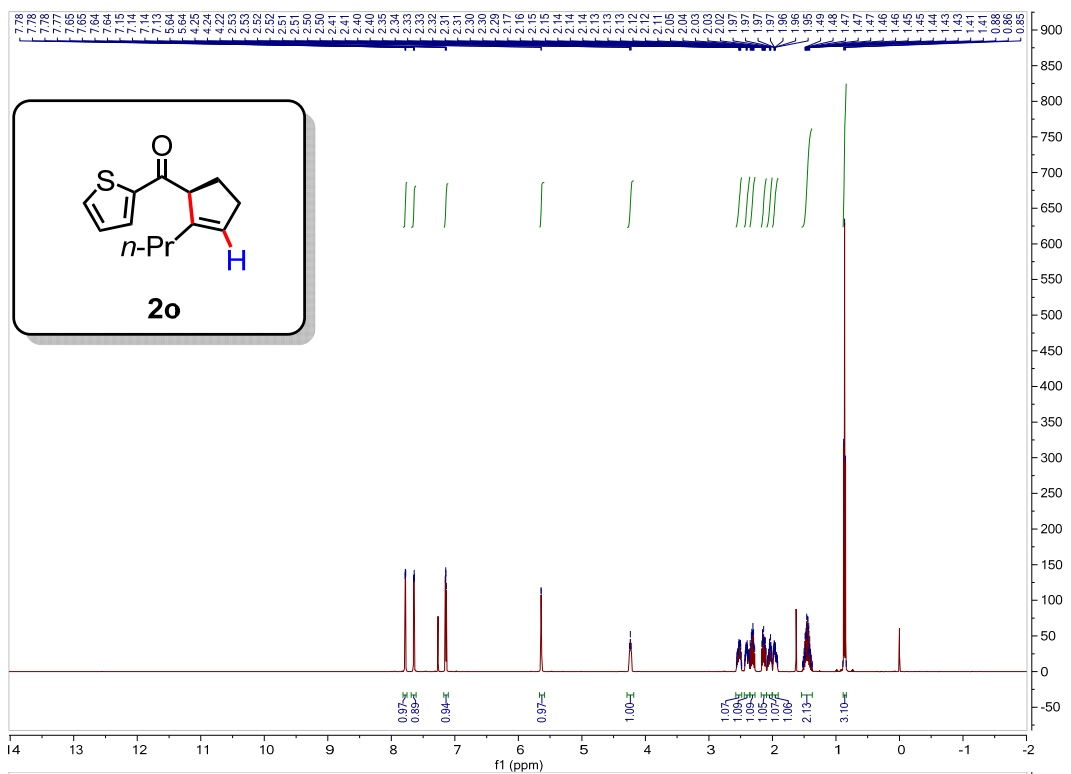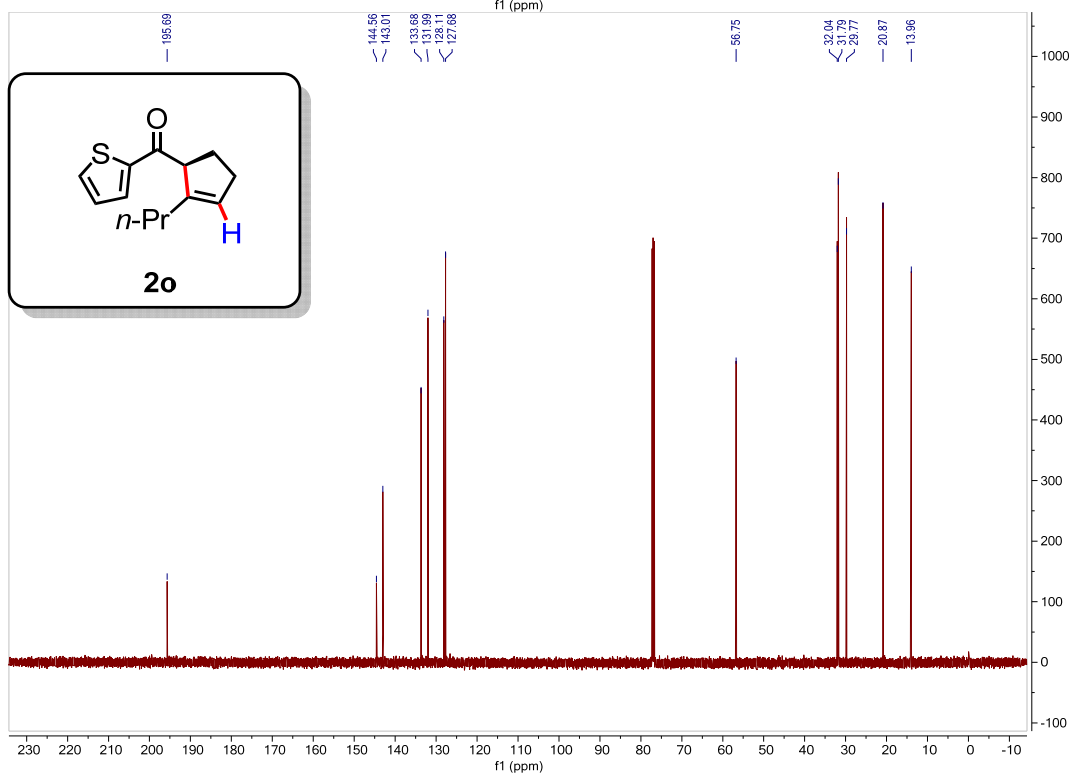

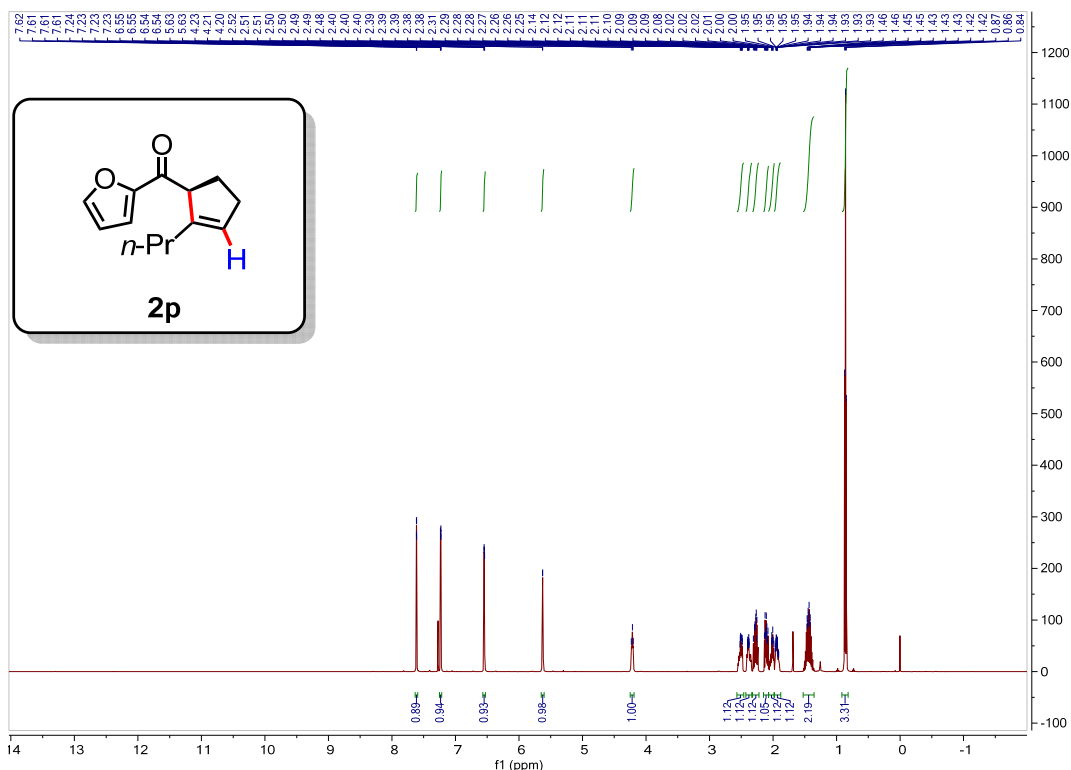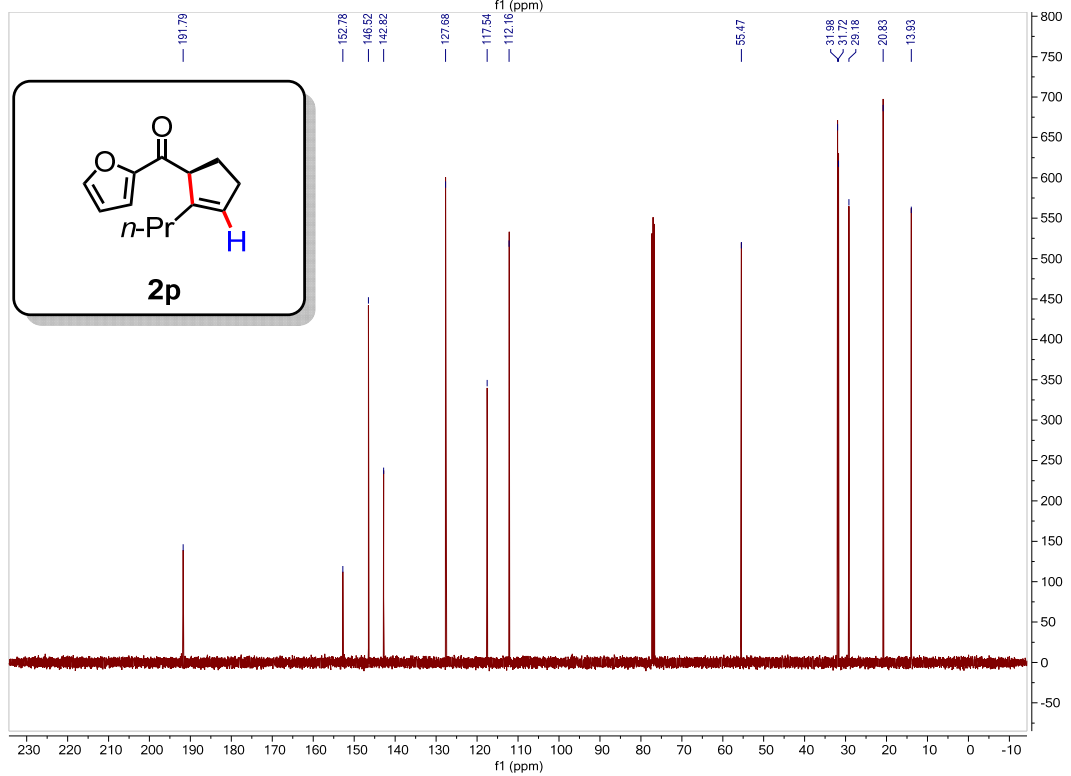

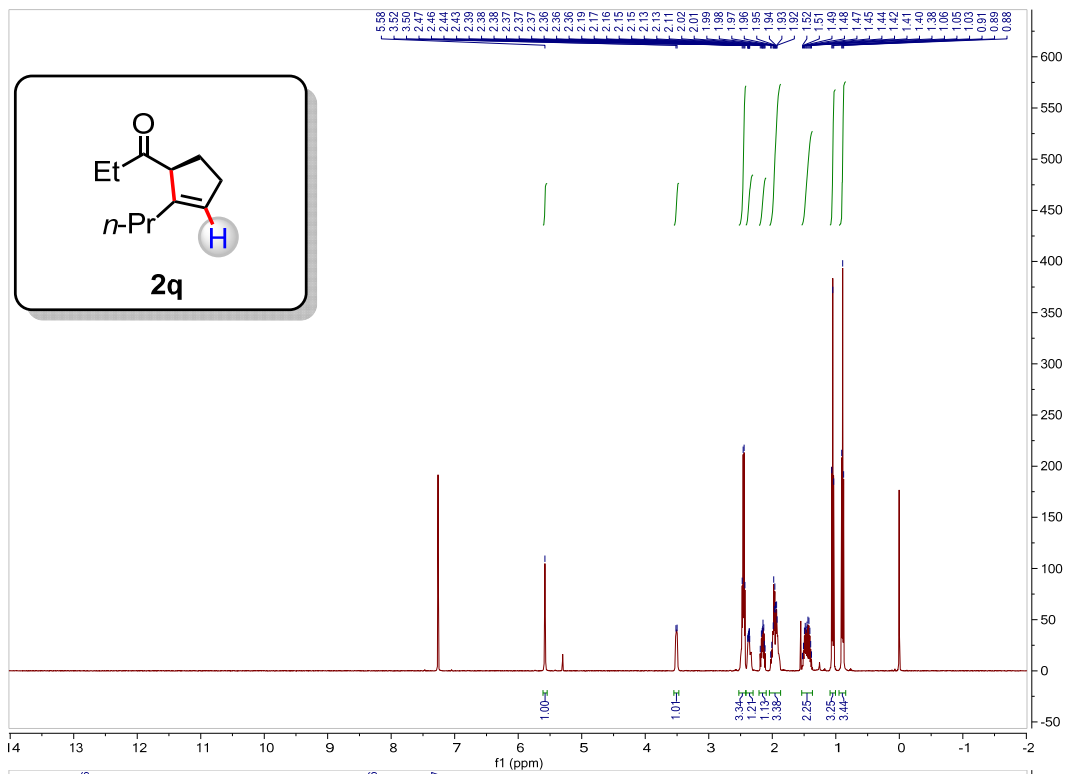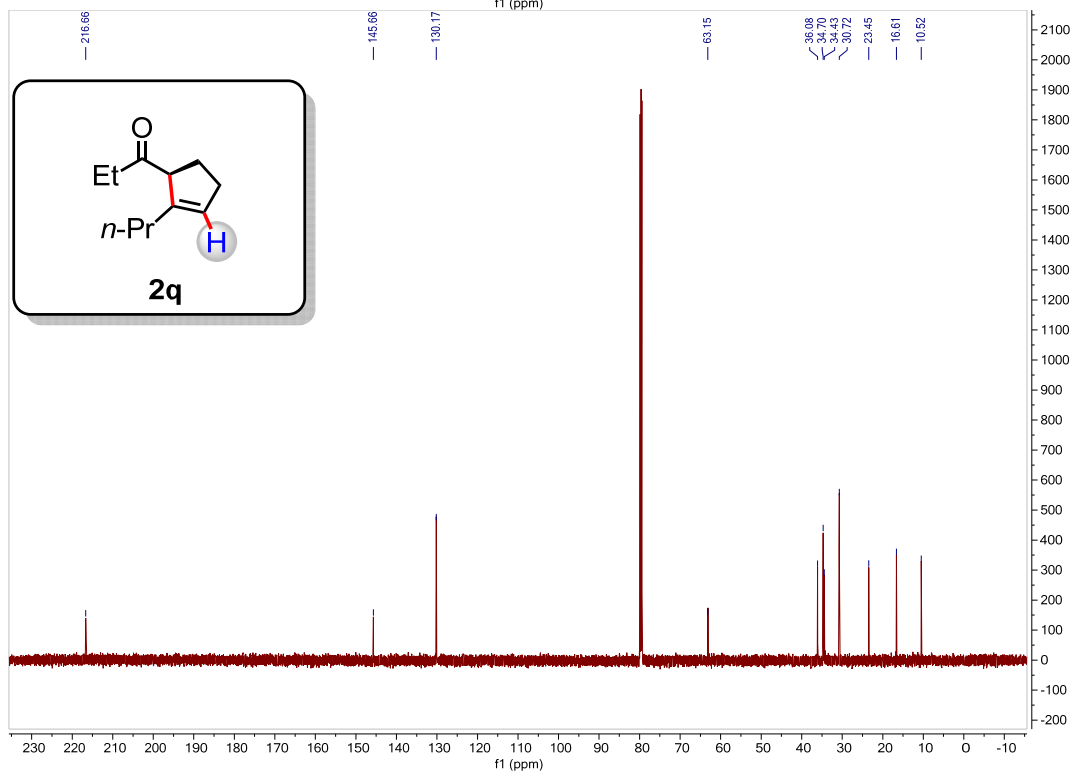

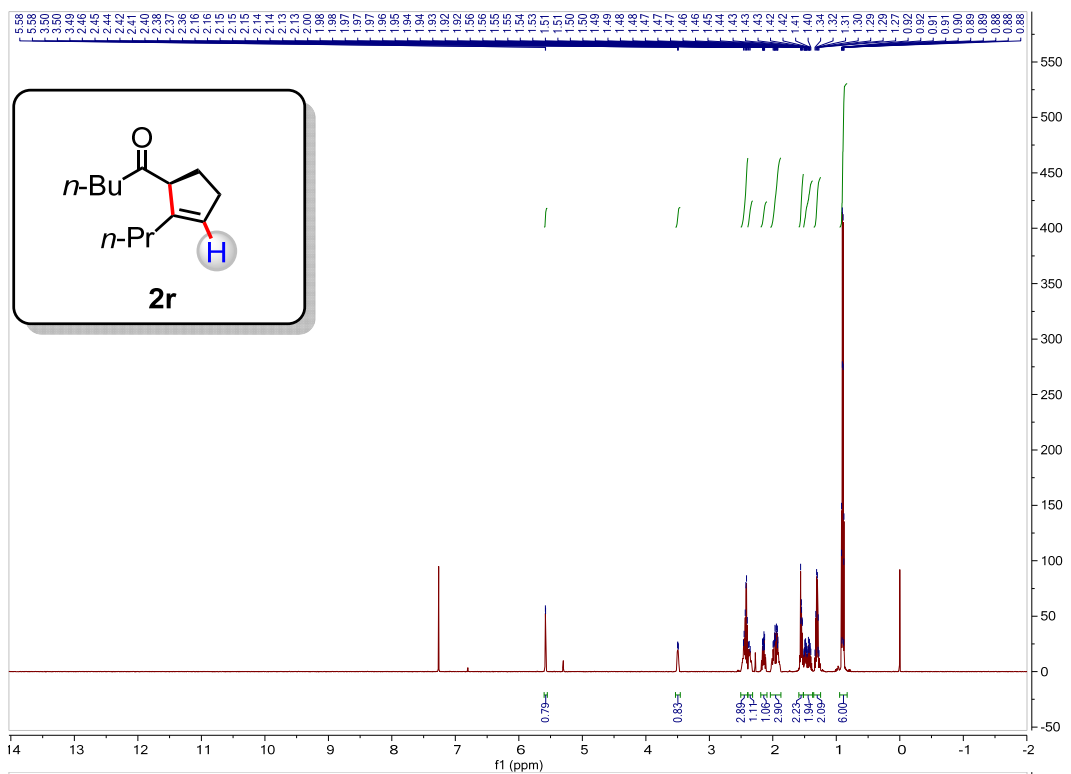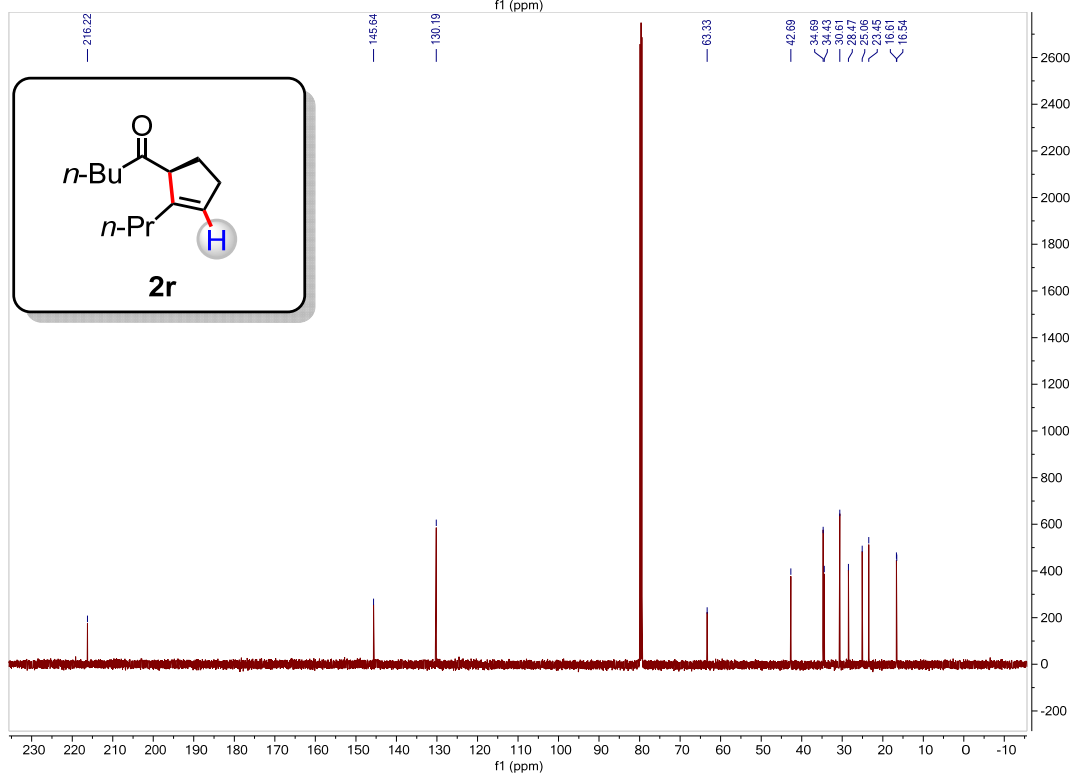

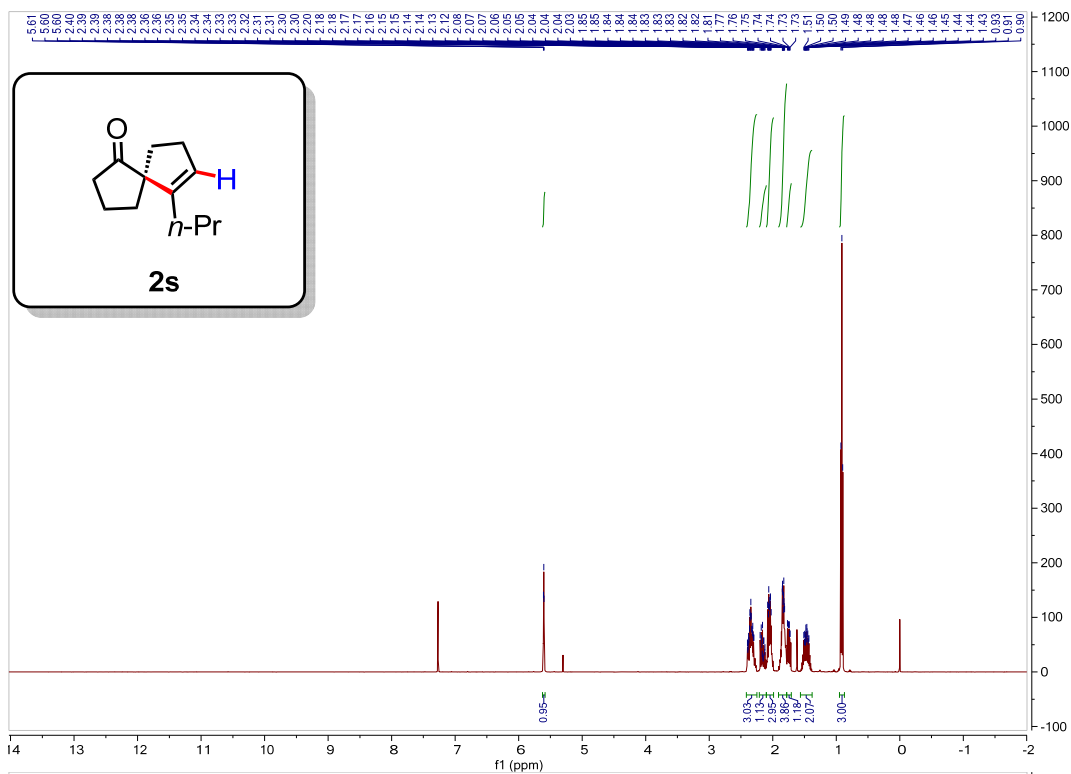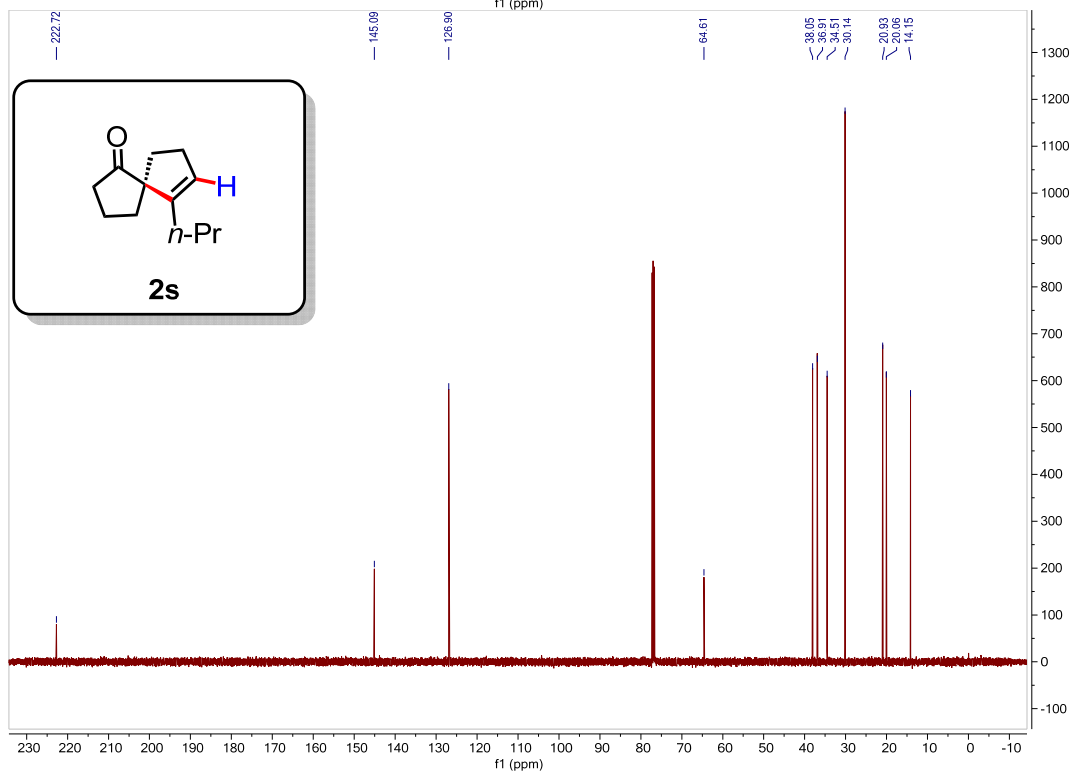



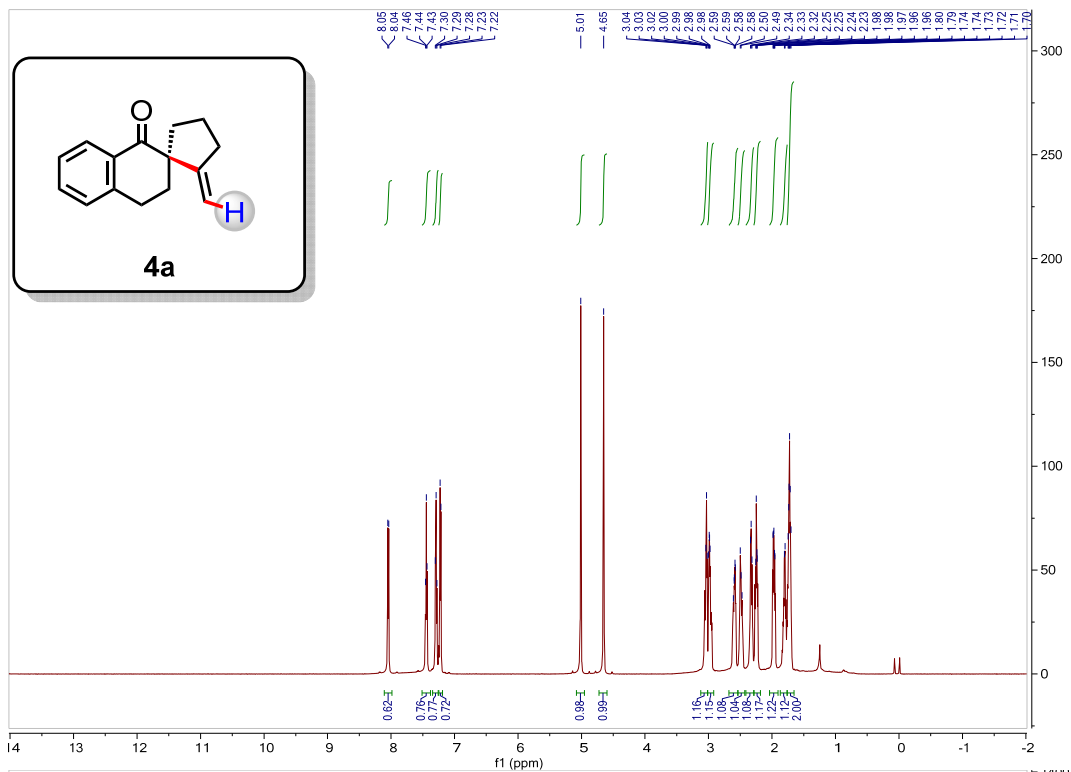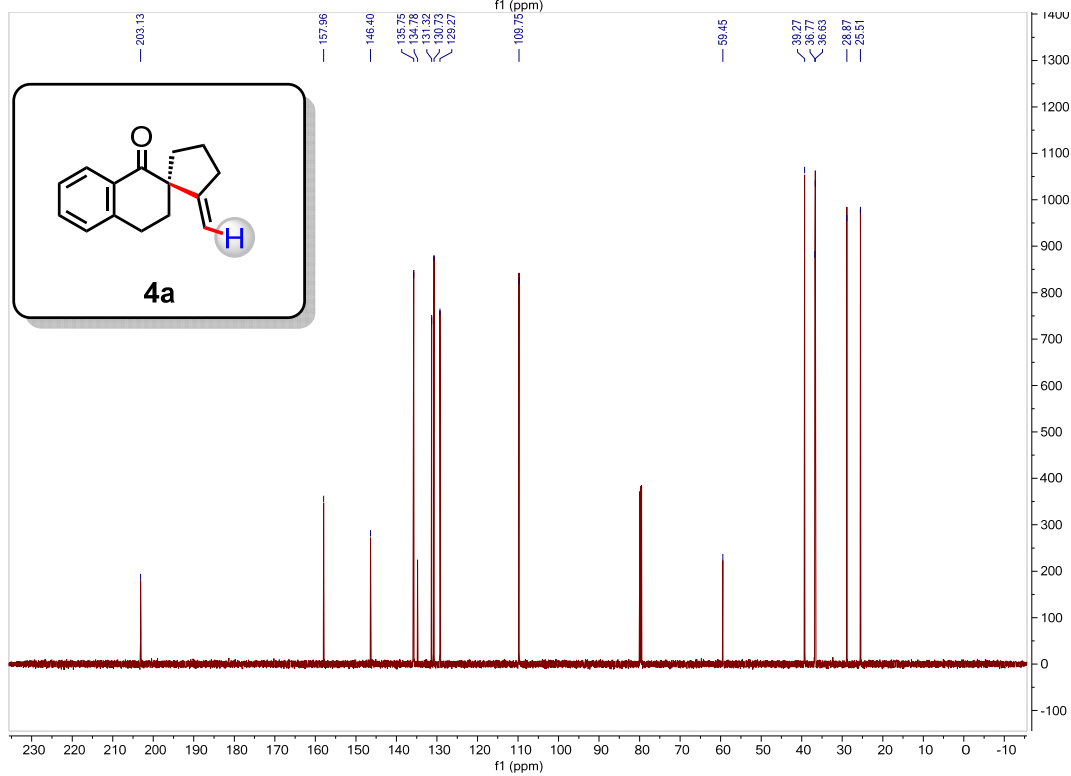

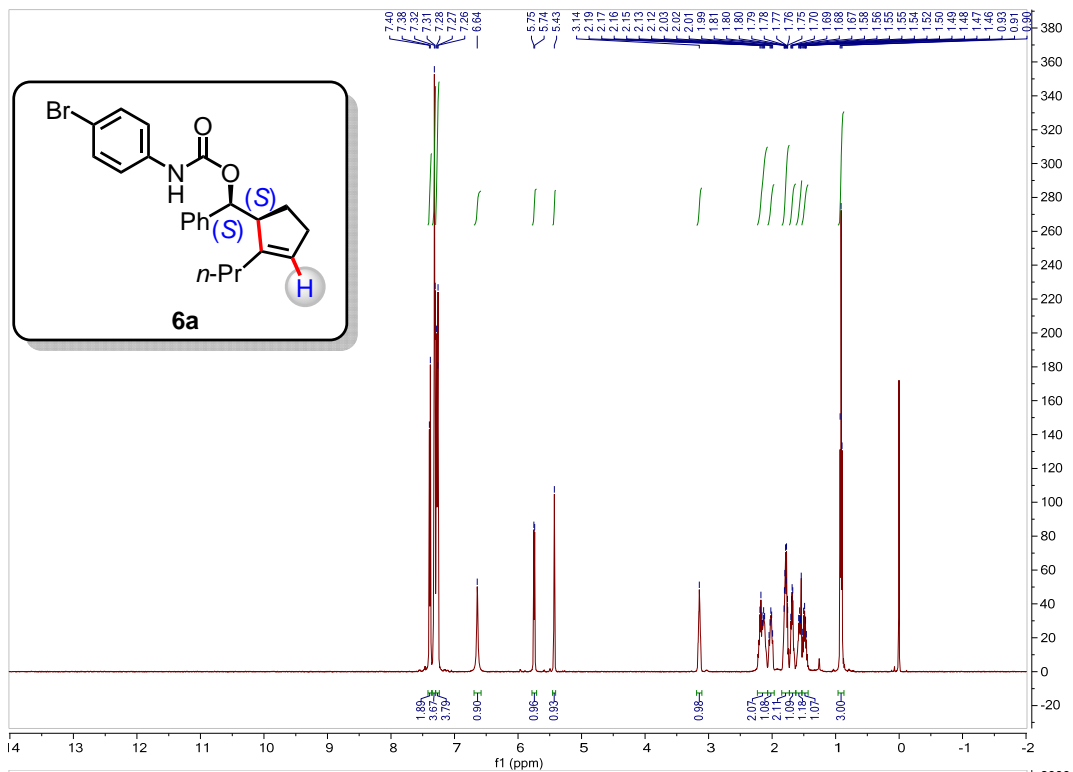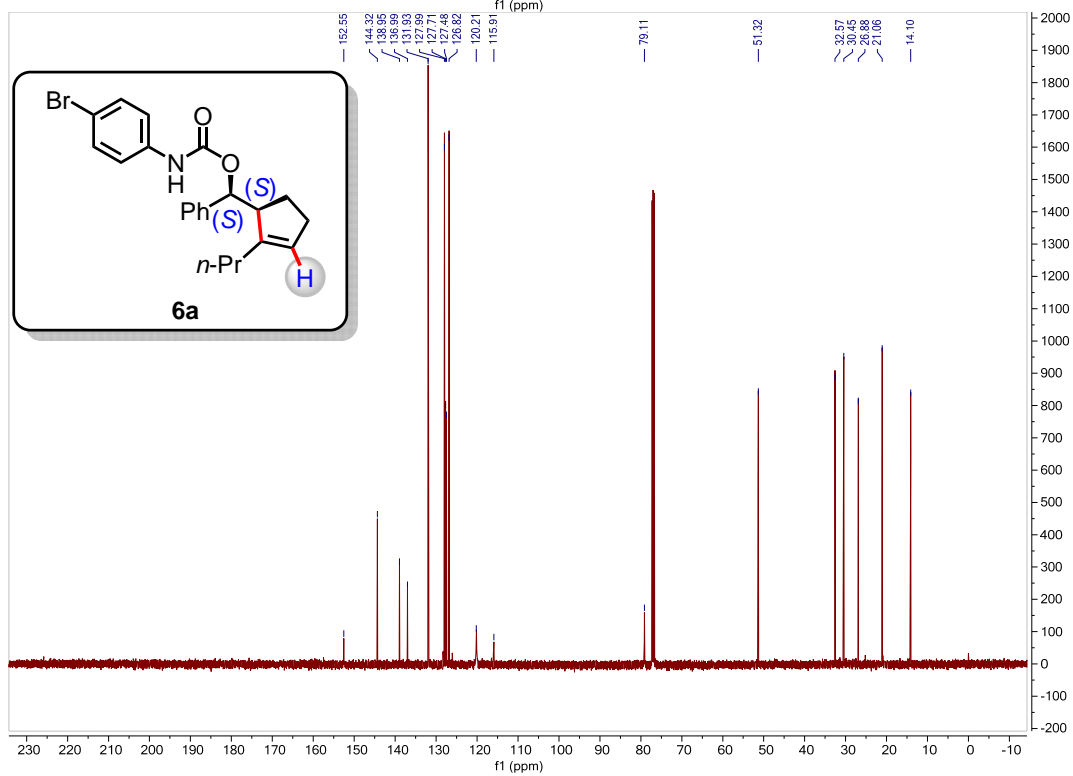

## 7. X-Ray Crystallography Data of 6a

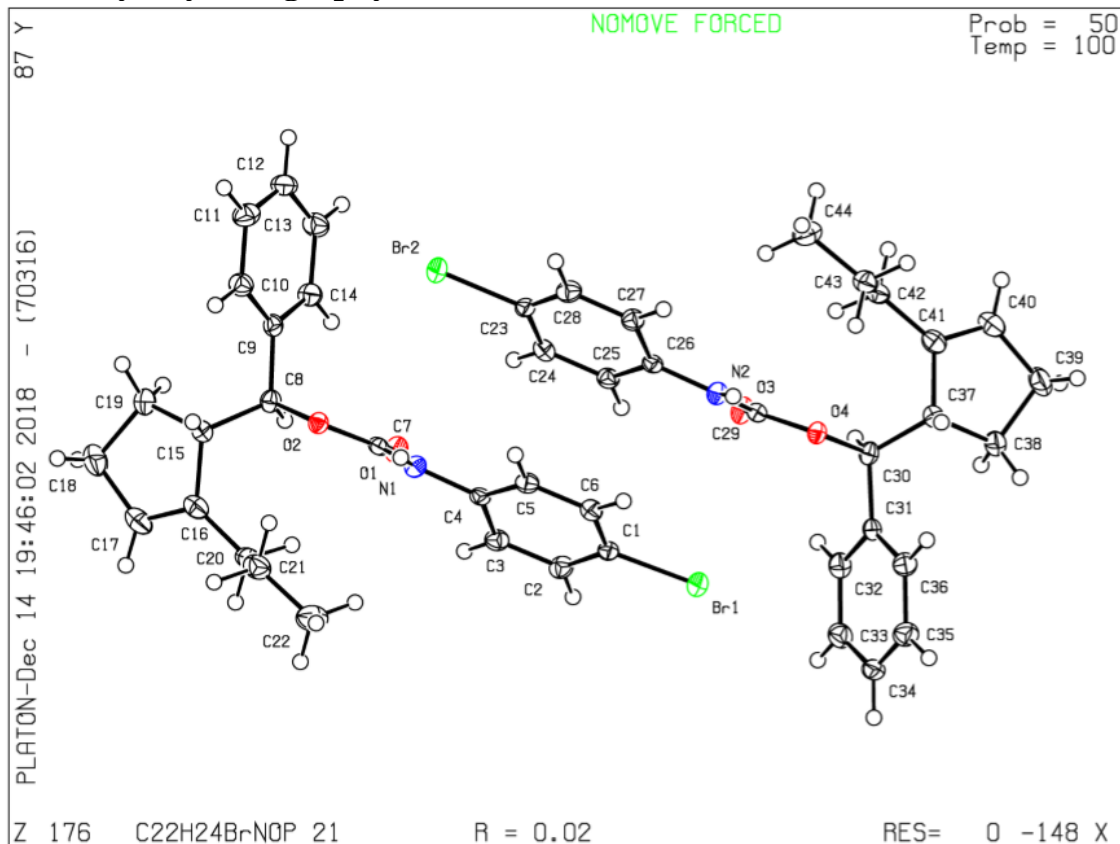

**Table SI-4.** Crystal data and structure refinement for C<sub>22</sub>H<sub>24</sub>BrNO<sub>2</sub>.

|                        |                                                     |                 |
|------------------------|-----------------------------------------------------|-----------------|
| Identification code    | C <sub>22</sub> H <sub>24</sub> BrNO <sub>2</sub>   |                 |
| Empirical formula      | C <sub>22</sub> H <sub>24</sub> Br N O <sub>2</sub> |                 |
| Formula weight         | 414.33                                              |                 |
| Temperature            | 100(2) K                                            |                 |
| Wavelength             | 1.54178 Å                                           |                 |
| Crystal system         | Monoclinic                                          |                 |
| Space group            | P2 <sub>1</sub>                                     |                 |
| Unit cell dimensions   | a = 5.1733(7) Å                                     | α = 90°.        |
|                        | b = 21.213(3) Å                                     | β = 97.186(3)°. |
|                        | c = 17.838(2) Å                                     | γ = 90°.        |
| Volume                 | 1942.2(4) Å <sup>3</sup>                            |                 |
| Z                      | 4                                                   |                 |
| Density (calculated)   | 1.417 Mg/m <sup>3</sup>                             |                 |
| Absorption coefficient | 3.002 mm <sup>-1</sup>                              |                 |
|                        | S-131                                               |                 |

|                                   |                                             |
|-----------------------------------|---------------------------------------------|
| F(000)                            | 856                                         |
| Crystal size                      | 0.600 x 0.320 x 0.250 mm <sup>3</sup>       |
| Theta range for data collection   | 2.496 to 66.756°.                           |
| Index ranges                      | -6<=h<=6, -25<=k<=25, -20<=l<=21            |
| Reflections collected             | 30083                                       |
| Independent reflections           | 6781 [R(int) = 0.0411]                      |
| Completeness to theta = 66.756°   | 99.7 %                                      |
| Absorption correction             | Semi-empirical from equivalents             |
| Max. and min. transmission        | 0.7528 and 0.4524                           |
| Refinement method                 | Full-matrix least-squares on F <sup>2</sup> |
| Data / restraints / parameters    | 6781 / 3 / 478                              |
| Goodness-of-fit on F <sup>2</sup> | 1.080                                       |
| Final R indices [I>2sigma(I)]     | R1 = 0.0220, wR2 = 0.0569                   |
| R indices (all data)              | R1 = 0.0221, wR2 = 0.0570                   |
| Absolute structure parameter      | 0.021(12)                                   |
| Extinction coefficient            | n/a                                         |
| Largest diff. peak and hole       | 0.369 and -0.319 e.Å <sup>-3</sup>          |

**Table SI-5.** Atomic coordinates ( $\times 10^4$ ) and equivalent isotropic displacement parameters ( $\text{\AA}^2 \times 10^3$ ) for  $\text{C}_{22}\text{H}_{24}\text{BrNO}_2$ .  $U(\text{eq})$  is defined as one third of the trace of the orthogonalized  $U_{ij}$  tensor.

|       | x       | y       | z       | $U(\text{eq})$ |
|-------|---------|---------|---------|----------------|
| Br(1) | 5552(1) | 4272(1) | 373(1)  | 27(1)          |
| Br(2) | 8026(1) | 5755(1) | 4587(1) | 28(1)          |
| N(1)  | 8293(4) | 4037(1) | 3778(1) | 18(1)          |
| N(2)  | 6281(4) | 5943(1) | 1162(1) | 17(1)          |
| O(1)  | 4149(4) | 4070(1) | 4106(1) | 22(1)          |
| O(2)  | 7713(4) | 3972(1) | 4984(1) | 17(1)          |
| O(3)  | 1851(4) | 5883(1) | 877(1)  | 21(1)          |
| O(4)  | 4533(4) | 6040(1) | -23(1)  | 17(1)          |
| C(1)  | 6504(6) | 4167(1) | 1432(2) | 19(1)          |
| C(2)  | 4892(6) | 3817(1) | 1835(2) | 22(1)          |
| C(3)  | 5475(6) | 3765(1) | 2614(2) | 21(1)          |
| C(4)  | 7673(5) | 4067(1) | 2983(2) | 16(1)          |
| C(5)  | 9320(5) | 4393(1) | 2562(2) | 19(1)          |
| C(6)  | 8750(6) | 4445(1) | 1784(2) | 21(1)          |
| C(7)  | 6491(5) | 4034(1) | 4275(2) | 17(1)          |
| C(8)  | 6067(5) | 3935(1) | 5595(2) | 18(1)          |
| C(9)  | 6056(5) | 4574(1) | 5963(2) | 18(1)          |
| C(10) | 8155(6) | 4783(1) | 6472(2) | 23(1)          |
| C(11) | 8145(6) | 5384(2) | 6781(2) | 27(1)          |
| C(12) | 6055(6) | 5782(2) | 6582(2) | 26(1)          |
| C(13) | 3961(6) | 5578(2) | 6083(2) | 27(1)          |
| C(14) | 3957(6) | 4974(1) | 5778(2) | 23(1)          |
| C(15) | 7162(5) | 3395(1) | 6112(2) | 20(1)          |
| C(16) | 6529(6) | 2736(1) | 5786(2) | 24(1)          |
| C(17) | 5701(7) | 2367(2) | 6299(2) | 31(1)          |
| C(18) | 5627(8) | 2681(2) | 7049(2) | 38(1)          |
| C(19) | 5897(6) | 3381(2) | 6853(2) | 26(1)          |
| C(20) | 6859(6) | 2541(2) | 4996(2) | 26(1)          |
| C(21) | 9695(6) | 2526(2) | 4827(2) | 29(1)          |
| C(22) | 9871(7) | 2342(2) | 4009(2) | 36(1)          |

|       |         |         |          |       |
|-------|---------|---------|----------|-------|
| C(23) | 7432(5) | 5826(1) | 3517(2)  | 18(1) |
| C(24) | 5238(6) | 5543(1) | 3130(2)  | 20(1) |
| C(25) | 4809(5) | 5585(1) | 2349(2)  | 19(1) |
| C(26) | 6541(5) | 5909(1) | 1959(2)  | 16(1) |
| C(27) | 8711(5) | 6201(1) | 2359(2)  | 20(1) |
| C(28) | 9153(6) | 6160(1) | 3142(2)  | 22(1) |
| C(29) | 4005(5) | 5944(1) | 689(2)   | 17(1) |
| C(30) | 2302(5) | 6083(1) | -624(2)  | 18(1) |
| C(31) | 2150(5) | 5466(1) | -1050(2) | 18(1) |
| C(32) | 341(6)  | 5017(2) | -893(2)  | 23(1) |
| C(33) | 224(6)  | 4438(2) | -1259(2) | 27(1) |
| C(34) | 1896(6) | 4309(2) | -1788(2) | 25(1) |
| C(35) | 3688(6) | 4754(2) | -1950(2) | 26(1) |
| C(36) | 3833(6) | 5330(1) | -1578(2) | 23(1) |
| C(37) | 2767(5) | 6672(1) | -1085(2) | 20(1) |
| C(38) | 830(6)  | 6705(1) | -1822(2) | 26(1) |
| C(39) | 161(8)  | 7410(2) | -1942(2) | 36(1) |
| C(40) | 850(6)  | 7676(2) | -1166(2) | 28(1) |
| C(41) | 2246(5) | 7290(1) | -694(2)  | 22(1) |
| C(42) | 3279(6) | 7452(1) | 107(2)   | 23(1) |
| C(43) | 6244(6) | 7513(2) | 256(2)   | 25(1) |
| C(44) | 7136(7) | 7665(2) | 1081(2)  | 33(1) |

---

**Table SI-6.** Bond lengths [ $\text{\AA}$ ] and angles [ $^\circ$ ] for  $\text{C}_{22}\text{H}_{24}\text{BrNO}_2$ .

---

|             |          |
|-------------|----------|
| Br(1)-C(1)  | 1.904(3) |
| Br(2)-C(23) | 1.901(3) |
| N(1)-C(7)   | 1.364(4) |
| N(1)-C(4)   | 1.417(4) |
| N(1)-H(1N)  | 0.89(2)  |
| N(2)-C(29)  | 1.360(4) |
| N(2)-C(26)  | 1.414(4) |
| N(2)-H(2N)  | 0.86(2)  |
| O(1)-C(7)   | 1.214(4) |
| O(2)-C(7)   | 1.347(3) |
| O(2)-C(8)   | 1.468(3) |
| O(3)-C(29)  | 1.210(3) |
| O(4)-C(29)  | 1.348(3) |
| O(4)-C(30)  | 1.476(3) |
| C(1)-C(6)   | 1.382(4) |
| C(1)-C(2)   | 1.384(4) |
| C(2)-C(3)   | 1.389(4) |
| C(2)-H(2)   | 0.9500   |
| C(3)-C(4)   | 1.395(4) |
| C(3)-H(3)   | 0.9500   |
| C(4)-C(5)   | 1.389(4) |
| C(5)-C(6)   | 1.387(4) |
| C(5)-H(5)   | 0.9500   |
| C(6)-H(6)   | 0.9500   |
| C(8)-C(9)   | 1.506(4) |
| C(8)-C(15)  | 1.534(4) |
| C(8)-H(8)   | 1.0000   |
| C(9)-C(14)  | 1.385(4) |
| C(9)-C(10)  | 1.397(4) |
| C(10)-C(11) | 1.388(4) |
| C(10)-H(10) | 0.9500   |
| C(11)-C(12) | 1.384(5) |
| C(11)-H(11) | 0.9500   |

|              |          |
|--------------|----------|
| C(12)-C(13)  | 1.383(5) |
| C(12)-H(12)  | 0.9500   |
| C(13)-C(14)  | 1.392(4) |
| C(13)-H(13)  | 0.9500   |
| C(14)-H(14)  | 0.9500   |
| C(15)-C(16)  | 1.532(4) |
| C(15)-C(19)  | 1.548(4) |
| C(15)-H(15)  | 1.0000   |
| C(16)-C(17)  | 1.317(5) |
| C(16)-C(20)  | 1.499(4) |
| C(17)-C(18)  | 1.498(5) |
| C(17)-H(17)  | 0.9500   |
| C(18)-C(19)  | 1.535(5) |
| C(18)-H(18A) | 0.9900   |
| C(18)-H(18B) | 0.9900   |
| C(19)-H(19A) | 0.9900   |
| C(19)-H(19B) | 0.9900   |
| C(20)-C(21)  | 1.535(4) |
| C(20)-H(20A) | 0.9900   |
| C(20)-H(20B) | 0.9900   |
| C(21)-C(22)  | 1.524(5) |
| C(21)-H(21A) | 0.9900   |
| C(21)-H(21B) | 0.9900   |
| C(22)-H(22A) | 0.9800   |
| C(22)-H(22B) | 0.9800   |
| C(22)-H(22C) | 0.9800   |
| C(23)-C(28)  | 1.375(4) |
| C(23)-C(24)  | 1.389(4) |
| C(24)-C(25)  | 1.387(4) |
| C(24)-H(24)  | 0.9500   |
| C(25)-C(26)  | 1.383(4) |
| C(25)-H(25)  | 0.9500   |
| C(26)-C(27)  | 1.397(4) |
| C(27)-C(28)  | 1.388(4) |
| C(27)-H(27)  | 0.9500   |



|              |          |
|--------------|----------|
| C(28)-H(28)  | 0.9500   |
| C(30)-C(31)  | 1.511(4) |
| C(30)-C(37)  | 1.532(4) |
| C(30)-H(30)  | 1.0000   |
| C(31)-C(32)  | 1.387(4) |
| C(31)-C(36)  | 1.391(4) |
| C(32)-C(33)  | 1.391(5) |
| C(32)-H(32)  | 0.9500   |
| C(33)-C(34)  | 1.384(5) |
| C(33)-H(33)  | 0.9500   |
| C(34)-C(35)  | 1.378(5) |
| C(34)-H(34)  | 0.9500   |
| C(35)-C(36)  | 1.388(4) |
| C(35)-H(35)  | 0.9500   |
| C(36)-H(36)  | 0.9500   |
| C(37)-C(41)  | 1.525(4) |
| C(37)-C(38)  | 1.551(4) |
| C(37)-H(37)  | 1.0000   |
| C(38)-C(39)  | 1.544(4) |
| C(38)-H(38A) | 0.9900   |
| C(38)-H(38B) | 0.9900   |
| C(39)-C(40)  | 1.494(5) |
| C(39)-H(39A) | 0.9900   |
| C(39)-H(39B) | 0.9900   |
| C(40)-C(41)  | 1.322(4) |
| C(40)-H(40)  | 0.9500   |
| C(41)-C(42)  | 1.502(4) |
| C(42)-C(43)  | 1.529(4) |
| C(42)-H(42A) | 0.9900   |
| C(42)-H(42B) | 0.9900   |
| C(43)-C(44)  | 1.521(4) |
| C(43)-H(43A) | 0.9900   |
| C(43)-H(43B) | 0.9900   |
| C(44)-H(44A) | 0.9800   |
| C(44)-H(44B) | 0.9800   |

|                  |          |
|------------------|----------|
| C(44)-H(44C)     | 0.9800   |
| C(7)-N(1)-C(4)   | 124.2(2) |
| C(7)-N(1)-H(1N)  | 120(2)   |
| C(4)-N(1)-H(1N)  | 116(2)   |
| C(29)-N(2)-C(26) | 126.2(2) |
| C(29)-N(2)-H(2N) | 118(2)   |
| C(26)-N(2)-H(2N) | 115(2)   |
| C(7)-O(2)-C(8)   | 117.0(2) |
| C(29)-O(4)-C(30) | 117.4(2) |
| C(6)-C(1)-C(2)   | 121.3(3) |
| C(6)-C(1)-Br(1)  | 120.0(2) |
| C(2)-C(1)-Br(1)  | 118.7(2) |
| C(1)-C(2)-C(3)   | 119.5(3) |
| C(1)-C(2)-H(2)   | 120.2    |
| C(3)-C(2)-H(2)   | 120.2    |
| C(2)-C(3)-C(4)   | 119.9(3) |
| C(2)-C(3)-H(3)   | 120.1    |
| C(4)-C(3)-H(3)   | 120.1    |
| C(5)-C(4)-C(3)   | 119.5(3) |
| C(5)-C(4)-N(1)   | 119.1(2) |
| C(3)-C(4)-N(1)   | 121.4(3) |
| C(6)-C(5)-C(4)   | 120.8(3) |
| C(6)-C(5)-H(5)   | 119.6    |
| C(4)-C(5)-H(5)   | 119.6    |
| C(1)-C(6)-C(5)   | 118.9(3) |
| C(1)-C(6)-H(6)   | 120.5    |
| C(5)-C(6)-H(6)   | 120.5    |
| O(1)-C(7)-O(2)   | 125.1(3) |
| O(1)-C(7)-N(1)   | 125.6(3) |
| O(2)-C(7)-N(1)   | 109.3(2) |
| O(2)-C(8)-C(9)   | 108.1(2) |
| O(2)-C(8)-C(15)  | 106.3(2) |
| C(9)-C(8)-C(15)  | 115.6(2) |
| O(2)-C(8)-H(8)   | 108.9    |

|                    |          |
|--------------------|----------|
| C(9)-C(8)-H(8)     | 108.9    |
| C(15)-C(8)-H(8)    | 108.9    |
| C(14)-C(9)-C(10)   | 118.8(3) |
| C(14)-C(9)-C(8)    | 119.5(3) |
| C(10)-C(9)-C(8)    | 121.6(3) |
| C(11)-C(10)-C(9)   | 120.5(3) |
| C(11)-C(10)-H(10)  | 119.7    |
| C(9)-C(10)-H(10)   | 119.7    |
| C(12)-C(11)-C(10)  | 120.0(3) |
| C(12)-C(11)-H(11)  | 120.0    |
| C(10)-C(11)-H(11)  | 120.0    |
| C(13)-C(12)-C(11)  | 119.9(3) |
| C(13)-C(12)-H(12)  | 120.0    |
| C(11)-C(12)-H(12)  | 120.0    |
| C(12)-C(13)-C(14)  | 120.1(3) |
| C(12)-C(13)-H(13)  | 119.9    |
| C(14)-C(13)-H(13)  | 119.9    |
| C(9)-C(14)-C(13)   | 120.6(3) |
| C(9)-C(14)-H(14)   | 119.7    |
| C(13)-C(14)-H(14)  | 119.7    |
| C(16)-C(15)-C(8)   | 114.1(2) |
| C(16)-C(15)-C(19)  | 102.4(2) |
| C(8)-C(15)-C(19)   | 111.3(2) |
| C(16)-C(15)-H(15)  | 109.6    |
| C(8)-C(15)-H(15)   | 109.6    |
| C(19)-C(15)-H(15)  | 109.6    |
| C(17)-C(16)-C(20)  | 125.1(3) |
| C(17)-C(16)-C(15)  | 110.6(3) |
| C(20)-C(16)-C(15)  | 124.3(3) |
| C(16)-C(17)-C(18)  | 113.7(3) |
| C(16)-C(17)-H(17)  | 123.1    |
| C(18)-C(17)-H(17)  | 123.1    |
| C(17)-C(18)-C(19)  | 102.4(3) |
| C(17)-C(18)-H(18A) | 111.3    |
| C(19)-C(18)-H(18A) | 111.3    |

|                     |          |
|---------------------|----------|
| C(17)-C(18)-H(18B)  | 111.3    |
| C(19)-C(18)-H(18B)  | 111.3    |
| H(18A)-C(18)-H(18B) | 109.2    |
| C(18)-C(19)-C(15)   | 105.8(3) |
| C(18)-C(19)-H(19A)  | 110.6    |
| C(15)-C(19)-H(19A)  | 110.6    |
| C(18)-C(19)-H(19B)  | 110.6    |
| C(15)-C(19)-H(19B)  | 110.6    |
| H(19A)-C(19)-H(19B) | 108.7    |
| C(16)-C(20)-C(21)   | 114.5(3) |
| C(16)-C(20)-H(20A)  | 108.6    |
| C(21)-C(20)-H(20A)  | 108.6    |
| C(16)-C(20)-H(20B)  | 108.6    |
| C(21)-C(20)-H(20B)  | 108.6    |
| H(20A)-C(20)-H(20B) | 107.6    |
| C(22)-C(21)-C(20)   | 111.5(3) |
| C(22)-C(21)-H(21A)  | 109.3    |
| C(20)-C(21)-H(21A)  | 109.3    |
| C(22)-C(21)-H(21B)  | 109.3    |
| C(20)-C(21)-H(21B)  | 109.3    |
| H(21A)-C(21)-H(21B) | 108.0    |
| C(21)-C(22)-H(22A)  | 109.5    |
| C(21)-C(22)-H(22B)  | 109.5    |
| H(22A)-C(22)-H(22B) | 109.5    |
| C(21)-C(22)-H(22C)  | 109.5    |
| H(22A)-C(22)-H(22C) | 109.5    |
| H(22B)-C(22)-H(22C) | 109.5    |
| C(28)-C(23)-C(24)   | 121.3(3) |
| C(28)-C(23)-Br(2)   | 119.8(2) |
| C(24)-C(23)-Br(2)   | 118.9(2) |
| C(25)-C(24)-C(23)   | 119.3(3) |
| C(25)-C(24)-H(24)   | 120.4    |
| C(23)-C(24)-H(24)   | 120.4    |
| C(26)-C(25)-C(24)   | 120.3(3) |
| C(26)-C(25)-H(25)   | 119.8    |

|                   |          |
|-------------------|----------|
| C(24)-C(25)-H(25) | 119.8    |
| C(25)-C(26)-C(27) | 119.5(3) |
| C(25)-C(26)-N(2)  | 123.0(2) |
| C(27)-C(26)-N(2)  | 117.4(2) |
| C(28)-C(27)-C(26) | 120.5(3) |
| C(28)-C(27)-H(27) | 119.8    |
| C(26)-C(27)-H(27) | 119.8    |
| C(23)-C(28)-C(27) | 119.1(3) |
| C(23)-C(28)-H(28) | 120.5    |
| C(27)-C(28)-H(28) | 120.5    |
| O(3)-C(29)-O(4)   | 125.4(2) |
| O(3)-C(29)-N(2)   | 125.7(3) |
| O(4)-C(29)-N(2)   | 108.8(2) |
| O(4)-C(30)-C(31)  | 107.3(2) |
| O(4)-C(30)-C(37)  | 106.2(2) |
| C(31)-C(30)-C(37) | 116.0(2) |
| O(4)-C(30)-H(30)  | 109.0    |
| C(31)-C(30)-H(30) | 109.0    |
| C(37)-C(30)-H(30) | 109.0    |
| C(32)-C(31)-C(36) | 119.3(3) |
| C(32)-C(31)-C(30) | 119.1(3) |
| C(36)-C(31)-C(30) | 121.5(3) |
| C(31)-C(32)-C(33) | 120.2(3) |
| C(31)-C(32)-H(32) | 119.9    |
| C(33)-C(32)-H(32) | 119.9    |
| C(34)-C(33)-C(32) | 120.0(3) |
| C(34)-C(33)-H(33) | 120.0    |
| C(32)-C(33)-H(33) | 120.0    |
| C(35)-C(34)-C(33) | 120.2(3) |
| C(35)-C(34)-H(34) | 119.9    |
| C(33)-C(34)-H(34) | 119.9    |
| C(34)-C(35)-C(36) | 120.0(3) |
| C(34)-C(35)-H(35) | 120.0    |
| C(36)-C(35)-H(35) | 120.0    |
| C(35)-C(36)-C(31) | 120.3(3) |

|                     |          |
|---------------------|----------|
| C(35)-C(36)-H(36)   | 119.8    |
| C(31)-C(36)-H(36)   | 119.8    |
| C(41)-C(37)-C(30)   | 114.0(2) |
| C(41)-C(37)-C(38)   | 102.5(2) |
| C(30)-C(37)-C(38)   | 111.3(2) |
| C(41)-C(37)-H(37)   | 109.6    |
| C(30)-C(37)-H(37)   | 109.6    |
| C(38)-C(37)-H(37)   | 109.6    |
| C(39)-C(38)-C(37)   | 105.7(2) |
| C(39)-C(38)-H(38A)  | 110.6    |
| C(37)-C(38)-H(38A)  | 110.6    |
| C(39)-C(38)-H(38B)  | 110.6    |
| C(37)-C(38)-H(38B)  | 110.6    |
| H(38A)-C(38)-H(38B) | 108.7    |
| C(40)-C(39)-C(38)   | 102.3(3) |
| C(40)-C(39)-H(39A)  | 111.3    |
| C(38)-C(39)-H(39A)  | 111.3    |
| C(40)-C(39)-H(39B)  | 111.3    |
| C(38)-C(39)-H(39B)  | 111.3    |
| H(39A)-C(39)-H(39B) | 109.2    |
| C(41)-C(40)-C(39)   | 113.9(3) |
| C(41)-C(40)-H(40)   | 123.1    |
| C(39)-C(40)-H(40)   | 123.1    |
| C(40)-C(41)-C(42)   | 124.5(3) |
| C(40)-C(41)-C(37)   | 110.7(3) |
| C(42)-C(41)-C(37)   | 124.7(3) |
| C(41)-C(42)-C(43)   | 114.5(2) |
| C(41)-C(42)-H(42A)  | 108.6    |
| C(43)-C(42)-H(42A)  | 108.6    |
| C(41)-C(42)-H(42B)  | 108.6    |
| C(43)-C(42)-H(42B)  | 108.6    |
| H(42A)-C(42)-H(42B) | 107.6    |
| C(44)-C(43)-C(42)   | 111.2(3) |
| C(44)-C(43)-H(43A)  | 109.4    |
| C(42)-C(43)-H(43A)  | 109.4    |

|                     |       |
|---------------------|-------|
| C(44)-C(43)-H(43B)  | 109.4 |
| C(42)-C(43)-H(43B)  | 109.4 |
| H(43A)-C(43)-H(43B) | 108.0 |
| C(43)-C(44)-H(44A)  | 109.5 |
| C(43)-C(44)-H(44B)  | 109.5 |
| H(44A)-C(44)-H(44B) | 109.5 |
| C(43)-C(44)-H(44C)  | 109.5 |
| H(44A)-C(44)-H(44C) | 109.5 |
| H(44B)-C(44)-H(44C) | 109.5 |

---

Symmetry transformations used to generate equivalent atoms:

**Table SI-7.** Anisotropic displacement parameters ( $\text{\AA}^2 \times 10^3$ ) for  $\text{C}_{22}\text{H}_{24}\text{BrNO}_2$ . The anisotropic displacement factor exponent takes the form:  $-2p^2 [ h^2 a^* 2U^{11} + \dots + 2 h k a^* b^* U^{12} ]$

|       | U <sup>11</sup> | U <sup>22</sup> | U <sup>33</sup> | U <sup>23</sup> | U <sup>13</sup> | U <sup>12</sup> |
|-------|-----------------|-----------------|-----------------|-----------------|-----------------|-----------------|
| Br(1) | 37(1)           | 24(1)           | 18(1)           | 1(1)            | -3(1)           | -1(1)           |
| Br(2) | 39(1)           | 26(1)           | 16(1)           | 2(1)            | -2(1)           | -2(1)           |
| N(1)  | 15(1)           | 20(1)           | 18(1)           | -1(1)           | 1(1)            | -1(1)           |
| N(2)  | 15(1)           | 21(1)           | 16(1)           | 1(1)            | 4(1)            | -1(1)           |
| O(1)  | 16(1)           | 29(1)           | 21(1)           | 1(1)            | 1(1)            | 1(1)            |
| O(2)  | 16(1)           | 18(1)           | 16(1)           | 1(1)            | 2(1)            | -1(1)           |
| O(3)  | 16(1)           | 31(1)           | 18(1)           | 2(1)            | 3(1)            | 0(1)            |
| O(4)  | 16(1)           | 20(1)           | 14(1)           | 1(1)            | 0(1)            | -1(1)           |
| C(1)  | 25(1)           | 15(1)           | 17(1)           | -2(1)           | 1(1)            | 5(1)            |
| C(2)  | 19(1)           | 23(2)           | 21(1)           | -2(1)           | -2(1)           | 0(1)            |
| C(3)  | 20(1)           | 19(1)           | 23(2)           | -2(1)           | 5(1)            | -2(1)           |
| C(4)  | 17(1)           | 12(1)           | 18(1)           | -1(1)           | 0(1)            | 4(1)            |
| C(5)  | 17(1)           | 18(2)           | 22(1)           | -2(1)           | 2(1)            | -1(1)           |
| C(6)  | 24(1)           | 17(1)           | 21(1)           | 1(1)            | 4(1)            | -2(1)           |
| C(7)  | 19(1)           | 11(1)           | 19(1)           | 0(1)            | 1(1)            | 0(1)            |
| C(8)  | 18(1)           | 21(1)           | 17(1)           | 1(1)            | 4(1)            | 1(1)            |
| C(9)  | 20(1)           | 19(1)           | 16(1)           | 2(1)            | 4(1)            | -2(1)           |
| C(10) | 22(1)           | 21(1)           | 25(2)           | -1(1)           | 1(1)            | -1(1)           |
| C(11) | 28(2)           | 26(2)           | 27(2)           | -6(1)           | 2(1)            | -6(1)           |
| C(12) | 35(2)           | 19(1)           | 27(2)           | -4(1)           | 10(1)           | -3(1)           |
| C(13) | 29(2)           | 22(2)           | 29(2)           | 0(1)            | 6(1)            | 6(1)            |
| C(14) | 23(1)           | 22(2)           | 24(2)           | -1(1)           | 2(1)            | 1(1)            |
| C(15) | 22(1)           | 17(1)           | 20(1)           | 2(1)            | 2(1)            | 0(1)            |
| C(16) | 23(1)           | 18(1)           | 30(2)           | 2(1)            | 1(1)            | 1(1)            |
| C(17) | 33(2)           | 19(2)           | 39(2)           | 6(1)            | 3(1)            | -2(1)           |
| C(18) | 51(2)           | 31(2)           | 33(2)           | 11(2)           | 11(2)           | -2(2)           |
| C(19) | 32(2)           | 26(2)           | 21(2)           | 4(1)            | 6(1)            | -1(1)           |
| C(20) | 29(2)           | 16(1)           | 29(2)           | -2(1)           | -2(1)           | 0(1)            |
| C(21) | 29(2)           | 23(2)           | 34(2)           | -1(1)           | 2(1)            | 6(1)            |



|       |       |       |       |       |        |       |
|-------|-------|-------|-------|-------|--------|-------|
| C(22) | 40(2) | 30(2) | 39(2) | -7(2) | 9(2)   | 2(2)  |
| C(23) | 24(1) | 16(1) | 15(1) | -2(1) | -1(1)  | 6(1)  |
| C(24) | 21(1) | 16(1) | 23(2) | 3(1)  | 4(1)   | 0(1)  |
| C(25) | 19(1) | 16(1) | 21(1) | 0(1)  | -1(1)  | -2(1) |
| C(26) | 17(1) | 13(1) | 18(1) | -1(1) | 2(1)   | 3(1)  |
| C(27) | 19(1) | 19(1) | 21(1) | -1(1) | 2(1)   | -2(1) |
| C(28) | 18(1) | 22(2) | 24(2) | -4(1) | 0(1)   | -1(1) |
| C(29) | 20(1) | 13(1) | 17(1) | 0(1)  | 2(1)   | 1(1)  |
| C(30) | 16(1) | 22(2) | 15(1) | 2(1)  | 1(1)   | 1(1)  |
| C(31) | 20(1) | 17(1) | 16(1) | 2(1)  | -2(1)  | 3(1)  |
| C(32) | 23(1) | 25(2) | 22(2) | 3(1)  | 3(1)   | 2(1)  |
| C(33) | 30(2) | 22(2) | 27(2) | 2(1)  | -2(1)  | -4(1) |
| C(34) | 34(2) | 17(1) | 23(1) | -2(1) | -5(1)  | 4(1)  |
| C(35) | 28(2) | 25(2) | 25(2) | -3(1) | 3(1)   | 6(1)  |
| C(36) | 22(1) | 23(2) | 23(2) | -1(1) | 3(1)   | 0(1)  |
| C(37) | 22(1) | 18(1) | 20(1) | 2(1)  | 2(1)   | 1(1)  |
| C(38) | 32(2) | 22(2) | 22(2) | 3(1)  | -2(1)  | -1(1) |
| C(39) | 48(2) | 24(2) | 32(2) | 9(1)  | -10(2) | -1(2) |
| C(40) | 27(2) | 19(2) | 35(2) | 3(1)  | 0(1)   | 0(1)  |
| C(41) | 19(1) | 19(1) | 27(2) | 2(1)  | 5(1)   | -3(1) |
| C(42) | 28(2) | 16(1) | 24(2) | -1(1) | 6(1)   | 2(1)  |
| C(43) | 29(2) | 20(2) | 26(2) | -1(1) | 5(1)   | -2(1) |
| C(44) | 40(2) | 30(2) | 29(2) | -8(1) | -1(1)  | -1(2) |

---

**Table SI-8.** Hydrogen coordinates ( $\times 10^4$ ) and isotropic displacement parameters ( $\text{\AA}^2 \times 10^3$ ) for  $\text{C}_{22}\text{H}_{24}\text{BrNO}_2$ .

|        | x        | y        | z        | U(eq) |
|--------|----------|----------|----------|-------|
| H(1N)  | 9980(50) | 4058(16) | 3953(18) | 21    |
| H(2N)  | 7700(50) | 5998(17) | 970(19)  | 21    |
| H(2)   | 3396     | 3613     | 1581     | 26    |
| H(3)   | 4380     | 3526     | 2895     | 25    |
| H(5)   | 10855    | 4584     | 2811     | 23    |
| H(6)   | 9885     | 4667     | 1498     | 25    |
| H(8)   | 4249     | 3827     | 5374     | 22    |
| H(10)  | 9600     | 4512     | 6608     | 27    |
| H(11)  | 9574     | 5521     | 7129     | 33    |
| H(12)  | 6059     | 6195     | 6787     | 32    |
| H(13)  | 2521     | 5851     | 5948     | 32    |
| H(14)  | 2503     | 4835     | 5440     | 27    |
| H(15)  | 9092     | 3443     | 6232     | 24    |
| H(17)  | 5197     | 1941     | 6204     | 37    |
| H(18A) | 7088     | 2539     | 7422     | 45    |
| H(18B) | 3960     | 2598     | 7249     | 45    |
| H(19A) | 7014     | 3602     | 7263     | 32    |
| H(19B) | 4168     | 3588     | 6781     | 32    |
| H(20A) | 5866     | 2837     | 4639     | 31    |
| H(20B) | 6092     | 2117     | 4902     | 31    |
| H(21A) | 10491    | 2946     | 4928     | 35    |
| H(21B) | 10691    | 2219     | 5168     | 35    |
| H(22A) | 9085     | 1925     | 3908     | 54    |
| H(22B) | 11703    | 2329     | 3922     | 54    |
| H(22C) | 8936     | 2653     | 3671     | 54    |
| H(24)  | 4045     | 5323     | 3398     | 24    |
| H(25)  | 3318     | 5391     | 2080     | 23    |
| H(27)  | 9892     | 6428     | 2094     | 24    |
| H(28)  | 10625    | 6360     | 3414     | 26    |
| H(30)  | 667      | 6141     | -386     | 21    |

|        |       |      |       |    |
|--------|-------|------|-------|----|
| H(32)  | -821  | 5107 | -534  | 28 |
| H(33)  | -1003 | 4129 | -1147 | 32 |
| H(34)  | 1807  | 3914 | -2040 | 30 |
| H(35)  | 4826  | 4666 | -2315 | 31 |
| H(36)  | 5087  | 5634 | -1686 | 27 |
| H(37)  | 4594  | 6670 | -1214 | 24 |
| H(38A) | 1641  | 6536 | -2254 | 31 |
| H(38B) | -761  | 6458 | -1769 | 31 |
| H(39A) | 1215  | 7605 | -2306 | 43 |
| H(39B) | -1711 | 7470 | -2122 | 43 |
| H(40)  | 332   | 8084 | -1026 | 33 |
| H(42A) | 2716  | 7122 | 444   | 27 |
| H(42B) | 2490  | 7855 | 241   | 27 |
| H(43A) | 7056  | 7114 | 119   | 30 |
| H(43B) | 6826  | 7852 | -67   | 30 |
| H(44A) | 6292  | 8053 | 1221  | 50 |
| H(44B) | 9031  | 7721 | 1155  | 50 |
| H(44C) | 6661  | 7317 | 1399  | 50 |

---

**Table SI-9.** Torsion angles [°] for C<sub>22</sub>H<sub>24</sub>BrNO<sub>2</sub>.

---

|                         |           |
|-------------------------|-----------|
| C(6)-C(1)-C(2)-C(3)     | 2.8(4)    |
| Br(1)-C(1)-C(2)-C(3)    | -176.3(2) |
| C(1)-C(2)-C(3)-C(4)     | 0.1(4)    |
| C(2)-C(3)-C(4)-C(5)     | -2.8(4)   |
| C(2)-C(3)-C(4)-N(1)     | 178.5(3)  |
| C(7)-N(1)-C(4)-C(5)     | 145.5(3)  |
| C(7)-N(1)-C(4)-C(3)     | -35.8(4)  |
| C(3)-C(4)-C(5)-C(6)     | 2.6(4)    |
| N(1)-C(4)-C(5)-C(6)     | -178.6(2) |
| C(2)-C(1)-C(6)-C(5)     | -3.0(4)   |
| Br(1)-C(1)-C(6)-C(5)    | 176.1(2)  |
| C(4)-C(5)-C(6)-C(1)     | 0.2(4)    |
| C(8)-O(2)-C(7)-O(1)     | 1.0(4)    |
| C(8)-O(2)-C(7)-N(1)     | -177.8(2) |
| C(4)-N(1)-C(7)-O(1)     | -1.7(4)   |
| C(4)-N(1)-C(7)-O(2)     | 177.0(2)  |
| C(7)-O(2)-C(8)-C(9)     | -100.4(3) |
| C(7)-O(2)-C(8)-C(15)    | 134.9(2)  |
| O(2)-C(8)-C(9)-C(14)    | 100.3(3)  |
| C(15)-C(8)-C(9)-C(14)   | -140.8(3) |
| O(2)-C(8)-C(9)-C(10)    | -77.7(3)  |
| C(15)-C(8)-C(9)-C(10)   | 41.3(4)   |
| C(14)-C(9)-C(10)-C(11)  | -0.6(4)   |
| C(8)-C(9)-C(10)-C(11)   | 177.4(3)  |
| C(9)-C(10)-C(11)-C(12)  | -0.5(5)   |
| C(10)-C(11)-C(12)-C(13) | 0.9(5)    |
| C(11)-C(12)-C(13)-C(14) | -0.3(5)   |
| C(10)-C(9)-C(14)-C(13)  | 1.2(4)    |
| C(8)-C(9)-C(14)-C(13)   | -176.9(3) |
| C(12)-C(13)-C(14)-C(9)  | -0.7(5)   |
| O(2)-C(8)-C(15)-C(16)   | -74.6(3)  |
| C(9)-C(8)-C(15)-C(16)   | 165.4(2)  |
| O(2)-C(8)-C(15)-C(19)   | 170.1(2)  |

|                         |           |
|-------------------------|-----------|
| C(9)-C(8)-C(15)-C(19)   | 50.2(3)   |
| C(8)-C(15)-C(16)-C(17)  | -133.8(3) |
| C(19)-C(15)-C(16)-C(17) | -13.4(3)  |
| C(8)-C(15)-C(16)-C(20)  | 47.2(4)   |
| C(19)-C(15)-C(16)-C(20) | 167.6(3)  |
| C(20)-C(16)-C(17)-C(18) | 178.4(3)  |
| C(15)-C(16)-C(17)-C(18) | -0.6(4)   |
| C(16)-C(17)-C(18)-C(19) | 14.4(4)   |
| C(17)-C(18)-C(19)-C(15) | -21.7(3)  |
| C(16)-C(15)-C(19)-C(18) | 21.5(3)   |
| C(8)-C(15)-C(19)-C(18)  | 143.7(3)  |
| C(17)-C(16)-C(20)-C(21) | -112.7(4) |
| C(15)-C(16)-C(20)-C(21) | 66.2(4)   |
| C(16)-C(20)-C(21)-C(22) | -178.4(3) |
| C(28)-C(23)-C(24)-C(25) | 1.5(4)    |
| Br(2)-C(23)-C(24)-C(25) | -179.1(2) |
| C(23)-C(24)-C(25)-C(26) | -0.3(4)   |
| C(24)-C(25)-C(26)-C(27) | -0.9(4)   |
| C(24)-C(25)-C(26)-N(2)  | 176.8(2)  |
| C(29)-N(2)-C(26)-C(25)  | 32.0(4)   |
| C(29)-N(2)-C(26)-C(27)  | -150.3(3) |
| C(25)-C(26)-C(27)-C(28) | 0.9(4)    |
| N(2)-C(26)-C(27)-C(28)  | -176.9(3) |
| C(24)-C(23)-C(28)-C(27) | -1.5(4)   |
| Br(2)-C(23)-C(28)-C(27) | 179.2(2)  |
| C(26)-C(27)-C(28)-C(23) | 0.3(4)    |
| C(30)-O(4)-C(29)-O(3)   | 0.8(4)    |
| C(30)-O(4)-C(29)-N(2)   | -177.6(2) |
| C(26)-N(2)-C(29)-O(3)   | -4.0(4)   |
| C(26)-N(2)-C(29)-O(4)   | 174.4(2)  |
| C(29)-O(4)-C(30)-C(31)  | -103.7(3) |
| C(29)-O(4)-C(30)-C(37)  | 131.6(2)  |
| O(4)-C(30)-C(31)-C(32)  | 100.5(3)  |
| C(37)-C(30)-C(31)-C(32) | -140.9(3) |
| O(4)-C(30)-C(31)-C(36)  | -77.5(3)  |

|                         |           |
|-------------------------|-----------|
| C(37)-C(30)-C(31)-C(36) | 41.0(4)   |
| C(36)-C(31)-C(32)-C(33) | 0.3(4)    |
| C(30)-C(31)-C(32)-C(33) | -177.8(3) |
| C(31)-C(32)-C(33)-C(34) | -0.7(4)   |
| C(32)-C(33)-C(34)-C(35) | 0.4(4)    |
| C(33)-C(34)-C(35)-C(36) | 0.4(4)    |
| C(34)-C(35)-C(36)-C(31) | -0.9(4)   |
| C(32)-C(31)-C(36)-C(35) | 0.5(4)    |
| C(30)-C(31)-C(36)-C(35) | 178.6(3)  |
| O(4)-C(30)-C(37)-C(41)  | -75.1(3)  |
| C(31)-C(30)-C(37)-C(41) | 165.7(2)  |
| O(4)-C(30)-C(37)-C(38)  | 169.6(2)  |
| C(31)-C(30)-C(37)-C(38) | 50.4(3)   |
| C(41)-C(37)-C(38)-C(39) | 21.0(3)   |
| C(30)-C(37)-C(38)-C(39) | 143.2(3)  |
| C(37)-C(38)-C(39)-C(40) | -20.9(3)  |
| C(38)-C(39)-C(40)-C(41) | 13.5(4)   |
| C(39)-C(40)-C(41)-C(42) | 177.5(3)  |
| C(39)-C(40)-C(41)-C(37) | 0.1(4)    |
| C(30)-C(37)-C(41)-C(40) | -133.9(3) |
| C(38)-C(37)-C(41)-C(40) | -13.5(3)  |
| C(30)-C(37)-C(41)-C(42) | 48.7(4)   |
| C(38)-C(37)-C(41)-C(42) | 169.1(3)  |
| C(40)-C(41)-C(42)-C(43) | -111.9(3) |
| C(37)-C(41)-C(42)-C(43) | 65.1(4)   |
| C(41)-C(42)-C(43)-C(44) | -178.9(3) |

---

Symmetry transformations used to generate equivalent atoms:

**Table SI-10.** Hydrogen bonds for C<sub>22</sub>H<sub>24</sub>BrNO<sub>2</sub> [Å and °].

| D-H...A             | d(D-H)  | d(H...A) | d(D...A) | <(DHA) |
|---------------------|---------|----------|----------|--------|
| N(1)-H(1N)...O(1)#1 | 0.89(2) | 2.14(2)  | 3.013(3) | 167(3) |
| N(2)-H(2N)...O(3)#1 | 0.86(2) | 2.19(3)  | 2.990(3) | 156(3) |

Symmetry transformations used to generate equivalent atoms:

#1 x+1,y,z
